# Supplementary material for: Patients’ perceptions of safety in emergency medical services: an interview study
Source: PubMed Central journal article supplement — BMJ Open. 2020 Oct 21;10(10):e037488. doi: 10.1136/bmjopen-2020-037488 (PMC7580042; doi:10.1136/bmjopen-2020-037488), 2020-10-21
Supplement: bmjopen-2020-037488.draft_revisions.pdf [file bmjopen-2020-037488.draft_revisions.pdf]

# BMJ Open

BMJ Open is committed to open peer review. As part of this commitment we make the peer review history of every article we publish publicly available.

When an article is published we post the peer reviewers' comments and the authors' responses online. We also post the versions of the paper that were used during peer review. These are the versions that the peer review comments apply to.

The versions of the paper that follow are the versions that were submitted during the peer review process. They are not the versions of record or the final published versions. They should not be cited or distributed as the published version of this manuscript.

BMJ Open is an open access journal and the full, final, typeset and author-corrected version of record of the manuscript is available on our site with no access controls, subscription charges or pay-per-view fees (<http://bmjopen.bmj.com>).

If you have any questions on BMJ Open's open peer review process please email [info.bmjopen@bmj.com](mailto:info.bmjopen@bmj.com)

# BMJ Open

## Patients' experiences of safety in emergency medical services – an interview study

|                               |                                                                                                                                                                                                                                                                                                                                                                                                                                                                                                                                                                                                                                                                    |
|-------------------------------|--------------------------------------------------------------------------------------------------------------------------------------------------------------------------------------------------------------------------------------------------------------------------------------------------------------------------------------------------------------------------------------------------------------------------------------------------------------------------------------------------------------------------------------------------------------------------------------------------------------------------------------------------------------------|
| Journal:                      | <i>BMJ Open</i>                                                                                                                                                                                                                                                                                                                                                                                                                                                                                                                                                                                                                                                    |
| Manuscript ID                 | bmjopen-2020-037488                                                                                                                                                                                                                                                                                                                                                                                                                                                                                                                                                                                                                                                |
| Article Type:                 | Original research                                                                                                                                                                                                                                                                                                                                                                                                                                                                                                                                                                                                                                                  |
| Date Submitted by the Author: | 07-Feb-2020                                                                                                                                                                                                                                                                                                                                                                                                                                                                                                                                                                                                                                                        |
| Complete List of Authors:     | Venesoja, Anu; South Karelia Social and Health Care District, Acute care unit; Department of Emergency Medicine and Services, Helsinki University Hospital, Helsinki University, Department of Emergency Medicine and Services<br>Castrén, Maaret; Department of Emergency Medicine and Services, Helsinki University Hospital, Helsinki University, Department of Emergency Medicine and Services<br>Tella, Susanna; LAB University of Applied Sciences; University of Eastern Finland Faculty of Health Sciences<br>Lindström, Veronica ; Karolinska Institutet, Department of Neurobiology, Care Sciences and Society, section of Nursing); Samariten Ambulance |
| Keywords:                     | ACCIDENT & EMERGENCY MEDICINE, QUALITATIVE RESEARCH, Health & safety < HEALTH SERVICES ADMINISTRATION & MANAGEMENT                                                                                                                                                                                                                                                                                                                                                                                                                                                                                                                                                 |
|                               |                                                                                                                                                                                                                                                                                                                                                                                                                                                                                                                                                                                                                                                                    |

SCHOLARONE™  
Manuscripts

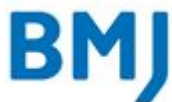

I, the Submitting Author has the right to grant and does grant on behalf of all authors of the Work (as defined in the below author licence), an exclusive licence and/or a non-exclusive licence for contributions from authors who are: i) UK Crown employees; ii) where BMJ has agreed a CC-BY licence shall apply, and/or iii) in accordance with the terms applicable for US Federal Government officers or employees acting as part of their official duties; on a worldwide, perpetual, irrevocable, royalty-free basis to BMJ Publishing Group Ltd ("BMJ") its licensees and where the relevant Journal is co-owned by BMJ to the co-owners of the Journal, to publish the Work in this journal and any other BMJ products and to exploit all rights, as set out in our [licence](#).

The Submitting Author accepts and understands that any supply made under these terms is made by BMJ to the Submitting Author unless you are acting as an employee on behalf of your employer or a postgraduate student of an affiliated institution which is paying any applicable article publishing charge ("APC") for Open Access articles. Where the Submitting Author wishes to make the Work available on an Open Access basis (and intends to pay the relevant APC), the terms of reuse of such Open Access shall be governed by a Creative Commons licence – details of these licences and which [Creative Commons](#) licence will apply to this Work are set out in our licence referred to above.

Other than as permitted in any relevant BMJ Author's Self Archiving Policies, I confirm this Work has not been accepted for publication elsewhere, is not being considered for publication elsewhere and does not duplicate material already published. I confirm all authors consent to publication of this Work and authorise the granting of this licence.

1  
2  
3  
4  
5 **PATIENTS' EXPERIENCES OF SAFETY IN EMERGENCY MEDICAL SERVICES –**  
6  
7 **AN INTERVIEW STUDY**  
8  
9

10 Anu Venesoja, RN, MHSc, PhD-student <sup>1,2</sup>; Maaret Castrén, MD, PhD <sup>2</sup>; Susanna Tella,  
11 RN, PhD <sup>3,4</sup>; Veronica Lindström, RN, PhD <sup>5,6</sup>  
12  
13  
14  
15

16  
17 <sup>1</sup> South Carelia Social and Healthcare District, Finland; <sup>2</sup> Department of Emergency  
18 Medicine and Services, Helsinki University Hospital, Helsinki University, Helsinki, Finland;  
19 <sup>3</sup> Helsinki University Hospital, Finland; <sup>4</sup> Samariten Ambulance, Stockholm, Sweden; <sup>5</sup>  
20 Karolinska Institutet, Department of Neurobiology, Care Sciences, and Society Division of  
21 Nursing Stockholm, Sweden <sup>6</sup> LAB University of Applied Sciences, Finland; <sup>7</sup> University of  
22 Eastern Finland.  
23  
24  
25  
26  
27  
28  
29

30 **Short running title:** EMS patients' experiences of safety  
31  
32

33 **Corresponding author:**  
34

35  
36 Anu Venesoja  
37

38 Address: Timonkatu 29, FI-55100 Imatra, Finland  
39

40 E-mail: [anu.venesoja@helsinki.fi](mailto:anu.venesoja@helsinki.fi)  
41

42 Telephone: +358-405575824  
43  
44  
45

46 Word count: 4606  
47  
48  
49  
50  
51  
52  
53  
54  
55  
56  
57  
58  
59  
60

1  
2  
3 **PATIENTS' EXPERIENCES OF SAFETY IN EMERGENCY MEDICAL SERVICES –**  
4  
5 **AN INTERVIEW STUDY**  
6  
7  
8

9  
10 **ABSTRACT**  
11

12 **Background:** Research on patient safety in Emergency Medical Services (EMS) has mainly  
13  
14 focused on the organization and/or the prehospital nurses' perspective. Little is known about  
15  
16 how patients experience safety in EMS. This study aims to describe patients' experiences  
17  
18 and sense of safety in EMS.  
19

20  
21 **Methods:** A qualitative design with individual interviews of EMS patients (n=21) and an  
22  
23 inductive qualitative content analysis were used.  
24  
25

26  
27 **Results:** Patients' experiences of prehospital nurses' ability or inability to show or use their  
28  
29 medical, technical, and driving skills were factors affecting the sense of safety. When  
30  
31 patients' perceived a lack of professionalism and knowledge among prehospital nurses, the  
32  
33 patients felt unsafe. Patients highlighted equality in the encounter, the quality of the  
34  
35 information given by prehospital nurses, and the opportunity to participate in the care as  
36  
37 important factors creating a sense of safety during the EMS encounter. Altogether patients'  
38  
39 experiences of safety in EMS were connected to their confidence in the prehospital nurses.  
40  
41

42  
43 **Conclusions:** Overall, patients felt safe during their EMS encounter, but prehospital nurses'  
44  
45 professional competence alone is not enough for patients to feel safe. Lack of  
46  
47 communication or professionalism may compromise patients' sense of safety. Further work  
48  
49 is needed to explore how patients can be involved in improving safety in EMS.  
50  
51

52  
53  
54 **Keywords:** Ambulance service; patient experience; qualitative study; safety; prehospital  
55  
56 nurse  
57  
58  
59  
60

## Strengths and limitations of this study

- This study reveals what patients consider important for feeling safe in the EMS.
- Interviews offered the opportunity to gain knowledge about patient safety in the EMS from the patients' perspective.
- Patients' feelings of safety in the EMS are related to how well prehospital nurses inspire confidence in their skills.
- Prehospital nurses' professional competence alone is not sufficient for patients to feel safe in the EMS.
- A limitation is that the interviews were done in a small hospital district, which could limit the transferability of the results.

## BACKGROUND

"To err is human"[1], but it can at worst cause disastrous results for patients seeking care and for the organization caring for the patients. Systematic development and research are therefore needed to ensure and improve patient safety and quality of care. Errors are described to usually be caused by faulty systems, processes, or conditions in the organization rather than by individual health care workers, and thus, all health care actors, including patients, should be involved in developing the safety culture in health care. Global recommendations and guidelines to improve patient safety include the patients as active team members whenever possible[1-3]. Despite recommendations and guidelines, patients are, however, an underused resource when monitoring safety in health care[4].

The World Health Organization (WHO) defines patient safety as "the prevention of errors and adverse effects to patients associated with health care", and it has been noted that safety culture in health care affects patient safety[2]. There are also similarities between safety culture and patient safety culture[5-9]. The theories of patient safety culture[5] and safety culture[10,11] are defined as dynamic and multilayered constructs. Researchers have shown that patient safety culture and safety culture both include three inter-related dimensions or levels. The "Organizational dimension" illustrates the actions by which management aims to ensure workplace safety or patient safety. The "Social process" or "group level" represents members' actions and interactions with others, and the "psychological dimension" or "individual level" involves an individual's subjective experience and understanding of safety or patient safety[5,10,11]. Considering these safety culture dimensions or levels, it is essential to recognize how these three dimensions or levels affect patients' experience of safety.

## **Safety and patient safety in emergency medical services**

Emergency medical services (EMS) can be considered a challenging and constantly changing environment compared with other emergency care settings in hospitals. The hospital environment is built for patient care and this environment changes less than EMS. The dynamic environment in EMS could compromise both prehospital nurses' and patients' safety. For example, transporting a patient to hospital by ambulance could be a hazardous situation. The risks of traffic accidents are known to increase if driving with blue lights and sirens [8,12,13].

Patient safety studies within the EMS setting have mainly investigated adverse events, mishaps, near-misses, occupational hazards, and patient safety or quality of care, and these previous studies have mainly focused on the organization or prehospital nurses' perspective and have not included the patients' point of view on safety[14-18]. Patient safety from the patients' viewpoint has mainly been investigated in hospital settings, showing that patients give valuable insights into improving or assessing patient safety[19-22]. As the EMS and hospital environment differs, there is a need to investigate patients' experiences of safety in the EMS. Therefore, the aim of this study was to describe patients' experiences and sense of safety in the EMS.

## **METHODS**

A qualitative study design with individual interviews was used to explore patients' experiences of safety in the EMS.

### **Setting**

The study was carried out in eastern Finland, a health care district covering approximately 132 000 inhabitants. There is one central hospital in the district and ambulance services covers the whole area (6872.10 km<sup>2</sup>), including both rural and urban regions. Ambulance



1  
2  
3 transports vary between 1 and over 100 km. In 2017, there were about 22 100 EMS requests  
4  
5 in the area according to official statistics. At present (year 2018), there are 11 ambulances,  
6  
7 two “one prehospital nurse units” (same equipment as in the ambulance and point-of-care  
8  
9 devices, not capable of transporting the patient), and one prehospital nurse officer  
10  
11 (operational supervisor of the shift, participates in challenging tasks). All of the ambulances  
12  
13 are manned by at least one prehospital nurse qualified in advanced life support techniques  
14  
15 and trained to handle mass casualty situations. In Finland, there are advanced-level  
16  
17 ambulances and basic-level ambulances. The former is equipped with two prehospital  
18  
19 nurses or one prehospital nurse and another qualified person, e.g. nurse or other health  
20  
21 care professional or rescue worker. The education level among advanced-level prehospital  
22  
23 nurses is at least a registered nurse (210 credits) with advanced life support education (30  
24  
25 credits) or a prehospital nurse with 240 credits. Basic-level ambulances are manned by at  
26  
27 least one emergency medical technician (EMT). Another qualified person in a basic-level  
28  
29 ambulance can be a nurse, other health care professional, or rescue worker[23,24]. In  
30  
31 Finland, the prehospital nurse either drives the ambulance or takes care of the patient during  
32  
33 transport. The highest educated ambulance personnel is always responsible for patient  
34  
35 care, but when the patient is assessed as low priority, a nurse, EMT, or other health care  
36  
37 professional can attend to the patient during transport.  
38  
39  
40  
41  
42  
43  
44  
45

### 46 **Data collection and participants**

47  
48 Data collection was undertaken at the central hospital emergency department (ED), where  
49  
50 patients are transported by EMS. Data were collected via semi-structured interviews  
51  
52 during March 2018. The interviews were conducted by the first author, a prehospital nurse  
53  
54 with 20 years' working experience in the EMS, and who has not had any professional or  
55  
56 personal contact with the participants beforehand. A purposeful data collection [25] was  
57  
58 used, aiming to achieve variation among participants and an information-rich material  
59  
60

1  
2  
3 without risking patient safety. Inclusion criteria were as follows: the patient was transported  
4  
5 by the EMS to the ED after an emergency call to the emergency response centre (ERC)  
6  
7 and the patient was assessed as low priority in the ED or the patient's priority was  
8  
9 assessed as low after treatment in the ED. Additional inclusion criteria were that the  
10  
11 patient was over 18 years of age, sober, and fully understanding and speaking Finnish.  
12  
13 Exclusion criteria were that the patient needed urgent treatment in the hospital, was not  
14  
15 sober (> 1.0 ‰), or had used other drugs and inter-hospital transports. Additional  
16  
17 exclusion criteria were age < 18 years, incapable of communicating in Finnish, or  
18  
19 presence of dementia, confusion, or terminal disease. ED nurses identified eligible  
20  
21 participants. The first author received a list of eligible participants' from the ED nurse. The  
22  
23 first author gave oral and written information about the study and asked about participation  
24  
25 after patients had received their initial assessment and treatment at the ED.  
26  
27  
28  
29

30  
31 In total, 22 patients were asked to participate, 21 of whom agreed to participate in the study.  
32  
33 One male refused the interview without providing a reason. All interviews were performed  
34  
35 during daytime (between 8 am to 4 pm). The first, second, and last authors (the first and last  
36  
37 authors with working experience in EMS as prehospital nurses, and the second author with  
38  
39 experience as an EMS physician) together devised the interview questions. The interviews  
40  
41 started with an open-ended question "*Can you tell me about your experience of the EMS*  
42  
43 *encounter?*" To encourage patients to share their experiences, additional questions were  
44  
45 asked concerning waiting time, assessment, treatment, transportation, and the handover at  
46  
47 the ED. The interviews concluded by asking the patients to describe what made them feel  
48  
49 safe or insecure during the EMS encounter. The interviews lasted between 10 and 20  
50  
51 minutes. The interviews continued until no more variation among the patients' experiences  
52  
53 was identified. All the interviews were recorded with a digital recorder and transcribed  
54  
55  
56  
57  
58  
59  
60

1  
2  
3 verbatim by the first author. Two of the interviews were translated from Finnish into English  
4  
5 to achieve transparency among all authors participating in the study.  
6  
7  
8

### 9 **Patient and public involvement**

10 Patients or public were not involved in the design and conduct of this study.  
11  
12  
13

### 14 **Data analysis**

15 An inductive qualitative content analysis was used to analyse the data [26]. The analysis  
16  
17 began after all interviews had been listened to and transcribed. The text was then read  
18  
19 several times to obtain a sense of the whole and to identify patients' expressions about their  
20  
21 experiences of safety and the EMS. All patient-expressed experiences identified were then  
22  
23 translated into English by the first author. The experiences were single words or short  
24  
25 sentences. In the first phase of open coding, the expressions that were similar received the  
26  
27 same open code. The third author, who had no experience in EMS, but had working  
28  
29 knowledge of patient safety research, read the transcripts and translated patient-expressed  
30  
31 text with the aim of increasing the reliability of the process and verifying the first phase of  
32  
33 open coding.  
34  
35  
36  
37  
38  
39  
40

41 After the open coding, codes were collected into a coding sheet consisting of codes related  
42  
43 to each other. These coding sheets were then abstracted into sub-categories, after which  
44  
45 the sub-categories were grouped into generic categories and finally into the main category.  
46  
47 Generic categories reflect factors that affect patients' sense of safety, and sub-categories  
48  
49 indicate the themes on which the main category was formed. During the analysis there was  
50  
51 a recurrent movement between the whole, the parts, and the whole. By being close, moving  
52  
53 backward and forward in the text during the analysis, the authors were striving to be as  
54  
55 reflective and open to the data as possible. The authors also discussed the balance between  
56  
57 their pre-understanding and openness to the content during the analysis. In every phase,  
58  
59  
60

the analysis continued after consensus between the researchers was reached. The last phase in the analysis was the conceptualization of the results, displayed in Figure 1.

### Ethical considerations

This study was approved by the Ethics Committee of Helsinki University Hospital (HUS/3529/2017). The patients received written information about the study purpose with contact information for the responsible researcher, and they had the possibility to ask questions about the research from the first author. The patients filled out a form affirming their voluntary participation in the study. The patients were informed that they have the right to withdraw from the study at any phase. During the interviews the first author observed the patients and was discontinued the discussion if any changes occurred in the patient's physical or mental condition.

### RESULTS

A total of 21 patients participated in the study. Their medical condition was classified in the ED as low priority. The main reason for seeking EMS care was cardiac-related symptoms or breathing difficulties, as displayed in Table 1. Two of the patients did not describe their health problem or the reason for requesting an ambulance.

Table 1. Description of patients.

|                  | Female<br>n=12 | Male<br>n=9  |
|------------------|----------------|--------------|
| Age range (mean) | 44–91 (74.5)   | 41–86 (68.1) |

|                                                          |   |   |
|----------------------------------------------------------|---|---|
| Transported from urban area                              | 7 | 5 |
| Transported from rural area                              | 5 | 4 |
| <i>Primary condition assessed by ambulance attendant</i> |   |   |
| Breathing difficulties                                   | 4 | 1 |
| Cardiac-related symptoms                                 | 3 | 2 |
| Gastrointestinal problems                                | 2 | 1 |
| Lower body pain                                          | 1 | 1 |
| Minor injury                                             | - | 2 |
| Neurological symptoms                                    | - | 2 |
| Missing data                                             | - | 2 |

The main category *Patients' confidence in the EMS* is described as prehospital nurses' social skills and contextual factors affecting patients' care and experience of safety. The main category underpinned by the generic categories and sub-categories is displayed in Figure 1. The generic categories with their sub-categories are presented below with illustrative quotations.

### **Prehospital nurses' social skills**

Sub-categories: *Equal treatment, Information, and Patients' possibility to influence their care and safety* underpin the generic category of Prehospital nurses' social skills. Equality in the care, the possibility to get information, and opportunity to participate in their care affected patients' sense of safety in EMS. From the patients' point of view, fair treatment was not always the case among prehospital nurses.

## Equal treatment

According to the patients, equal treatment and a reliable patient-prehospital nurse relationship generated a sense of safety in the EMS. The patients noted that it is essential that prehospital nurses' behaviour is calm, natural, and friendly. The patients expressed that a bit of humour and small talk during the care lighten the atmosphere and help to create a good patient - prehospital nurse relationship.

*"They didn't feel like officials. They were like human to human." (Pt5)*

On the other hand, patients described feelings of unfair treatment and insecurity in care when prehospital nurses' behaviour created a sense of being rushed, when the nurses were negative or too official, or when the nurses lacked communication skills. The patients also stated that the prehospital nurses did not always take their concerns seriously and sometimes ignored them altogether. This was reflected in how patients described situations where their mental and/or physical condition created a feeling of insecurity, e.g. if they had difficulties with breathing, felt lonely, or had to wait for the ambulance for a long time. Feeling insecure as a result of unfair treatment caused a sense of being unsafe among the patients.

*"Waiting is the worst, especially if you are alone and there isn't anyone with you"*  
*(Pt6)*

*"The journey was unsafe because I had breathing problems" (Pt16)*

## Information

Most patients mentioned that the prehospital nurses gave enough information about the measurements, a student participant, environmental conditions, treatment, and medication as well as about driving with lights and sirens on. Also, if the prehospital nurse had contacted the hospital beforehand, the patients expressed that the information had transferred to the hospital personnel. The patients describe that in these situations their treatment in the

1  
2  
3 hospital started smoothly and quickly. However, some patients described not getting enough  
4 information. Usually the lack of information concerned measurements or the patient's  
5 medication during care. Even these patients maintained confidence in the prehospital  
6 nurses and their professionalism because of the feeling that they received help from EMS  
7 personnel. Lack of information thus had negligible impact on patients' feelings of safety in  
8 the EMS.  
9

10  
11  
12  
13  
14  
15  
16  
17 *"Ambulance personnel interviewed me and they took all sorts of measurements and*  
18 *I don't know all the measurements they took" (Pt13)*  
19

20  
21  
22  
23 Patients' possibility to influence their care and safety

24 According to the patients, their possibilities to influence care and safety varied. Patients'  
25 possibility to affect their transport position had an impact on their safety experience.  
26 Especially those suffering from breathing problems stated that they wanted to sit on the seat  
27 rather than lay on the stretcher even if they were placed in an upright position. However,  
28 prehospital nurses usually ignored this wish without explaining why it was not possible.  
29 Although some of the patients said that they did not have the chance to affect how they were  
30 moved to the ambulance or what position or where to stay during the transport, however  
31 they did not automatically define this as a negative thing.  
32  
33  
34  
35  
36  
37  
38  
39  
40  
41  
42  
43

44  
45 *"They didn't let me walk anymore, they were pushing (with the stretchers) the old*  
46 *granny ... it sort of gives a nice feeling that somebody is still taking care of the old*  
47 *granny" (Pt5)*  
48  
49  
50

51  
52 In some situations, regarding safety, the patients took an active role. For example, they  
53 asked the prehospital nurses to put safety belts on or they asked to reduce ambulance  
54 speed if they felt that the speed compromised their safety.  
55  
56  
57  
58  
59  
60

1  
2  
3 *"I said that at least put the seatbelt on me. If you drive off the road, I fly out of here*  
4  
5 *(from the stretchers) because I don't have the seatbelt on"* (Pt10)  
6  
7  
8

### 9 **Contextual factors affecting care**

10  
11 Sub-categories: *Society and physical environment*, and *Prehospital nurses' professional*  
12 *competence and Prehospital nurses' driving skills* underpin the generic category Contextual  
13 factors affecting care. The patients feel that EMS provides an essential public safety  
14 function. They also described that the physical environment (e.g. road and weather  
15 conditions, ambulance suspension, and conditions inside the ambulance during the  
16 transport) affects their experience of safety in the EMS. Prehospital nurses' technical and  
17 driving skills were highlighted when the patients talked about their experiences of factors  
18 affecting the care and safety in EMS.  
19  
20  
21  
22  
23  
24  
25  
26  
27  
28  
29

#### 30 31 Society and physical environment

32  
33 Society and physical environment markedly affect patients' feelings of safety in EMS. The  
34 patients feel that EMS provides an essential public safety function. Almost all of the patients  
35 interviewed had some preconceived notions of how the EMS works, expectations based on  
36 their own experiences or on how the service has been described in the media. Quick  
37 response times increase patients' experience of safety. However, the experience of quick  
38 response time varied between the patients. Patients described a feeling of relief and security  
39 when the prehospital nurses arrived and brought help to them with good equipment. They  
40 mentioned that they felt safe while the ambulance transported them to hospital.  
41  
42  
43  
44  
45  
46  
47  
48  
49  
50  
51

52  
53 *" Because I know that every time when I call an ambulance, help is near"* (Pt13)  
54

55 Some environmental issues reduced patients' feeling of safety or made them uncomfortable.  
56 Bad, bumpy roads or poor suspension in the ambulance made patients feel worse during  
57 the transport. The experience of feeling bad increased if the temperature was too hot or too  
58  
59  
60



1  
2  
3 cold during the transport. Uncomfortable and narrow stretchers and difficulties in getting  
4  
5 inside the ambulance impair the experience of the care.  
6  
7

8 *"Why did the ambulance have such bad and noisy suspension? Was the road so*  
9 *bad or was it the ambulance suspension?" (Pt10)*  
10  
11  
12  
13

14 Prehospital nurses' professional competence

15  
16 Patients stated that prehospital nurses' professional competence made them feel safe  
17 during care. According to the patients, good professional competence means asking  
18 questions related to their health problems, background information about previous illness,  
19 medication, home situation, etc., and taking a lot of measurements and giving medication  
20 when needed. These factors made the patients feel that the treatment had started  
21 immediately, and prehospital nurses were interested in their health problem. Also, the  
22 patients mentioned that when prehospital nurses supervised and gave guidance to the  
23 student it had an effect on the patient's experience of the prehospital nurse's professional  
24 competence. Patients noted that the prehospital nurses mainly had good professional  
25 competence from their point of view.  
26  
27  
28  
29  
30  
31  
32  
33  
34  
35  
36  
37  
38  
39

40 *"The guys inserted an i.v. (intravenous cannula) and did measurements. Very*  
41 *professional personnel inserted the i.v. into my forearm, so they are very well*  
42 *educated" (Pt11)*  
43  
44  
45  
46

47 *"They took care of me and measured my blood pressure and gave me the*  
48 *medication orally and that made me feel safe" (Pt8)*  
49  
50  
51

52 However, some of the patients perceived that prehospital nurses lacked professional  
53 competence, and this affected their sense of safety. This situation occurred when  
54 prehospital nurses were uncertain of what had caused the patients' health problem or when  
55 the patient became aware that the prehospital nurse had a lack of knowledge, e.g. when the  
56  
57  
58  
59  
60

1  
2  
3 only solution to the patients' problem in the nurses' view was to transport the patient to the  
4 hospital. Also, when the prehospital nurses lacked communication skills and were unable to  
5 put in an i.v., these were interpreted as a lack of professional competence by the patients.  
6  
7  
8  
9  
10 These factors made the patient feel uncertain and unsafe.

11  
12  
13 *"They said that they don't understand, and they brought me here (hospital)... they*  
14 *tried to insert an i.v. in my forearm and it failed" (Pt3)*  
15  
16  
17

### 18 19 Prehospital nurses' driving skills

20  
21 For the most part, the patients felt that the prehospital nurses had good driving skills,  
22 reflected in "smooth and fast transportation" or not driving too fast. Also, if the driver took  
23 notice of the weather and road conditions and adjusted the driving style to these, the patient  
24 had an impression of good driving skills and safe transportation. However, some of the  
25 patients felt unsafe and insecure if the ambulance speed was too high, especially if the  
26 weather conditions were bad or the roads were slippery or uneven.  
27  
28  
29  
30  
31  
32  
33

34  
35 *"The hail was falling, it was the size of ping pong balls, and other cars had stopped*  
36 *at the roadside but the ambulance was going very fast" (Pt10)*  
37  
38  
39  
40  
41

## 42 **DISCUSSION**

43  
44 In this study, the perception of fairness, the possibility to get information, and the opportunity  
45 to participate in care affected the patient's sense of safety in the EMS. A previous study[27]  
46 showed that shared information and being treated in a friendly and respectful manner are  
47 important when involving patients in patient safety. If the patient feels objectified by the  
48 prehospital nurse, this may cause a feeling of "suffering from care"[28], leading to a sense  
49 of unsafety. Previous knowledge of patient experiences of safety in hospital settings[19-22]  
50 highlights that being treated fairly is important to patients, and based on our findings this is  
51  
52  
53  
54  
55  
56  
57  
58  
59  
60

1  
2  
3 also true in the context of EMS. If we consider the patient a team member in the EMS rather  
4  
5 than a patient or an object, it becomes clear why a good patient-prehospital nurse  
6  
7 relationship is so essential to the patient's sense of safety. In the EMS, the prehospital nurse  
8  
9 should be considered the team leader who in turn treats the patient like a team member.  
10  
11 Edmonson[29] concludes that "the action of team leaders promotes team psychological  
12  
13 safety" and "trust and respect in horizontal group relationships promote team psychological  
14  
15 safety". These conclusions may help us to understand why patients experience equality,  
16  
17 getting enough information, and having an opportunity to participate in care as crucial in  
18  
19 feeling safe.  
20  
21  
22

23  
24 As stated by O'Hara et al.[21], our study also reveals that patient safety is a more critical  
25  
26 issue from the patients' perspective than from the perspective of health care workers and  
27  
28 organizations. In health care overall and in the EMS setting, it is crucial that health care  
29  
30 workers support patient participation and provide relevant information to the patients.  
31  
32 According to the conclusions of Sahlström et al.[27] and Edmonson[29], by the prehospital  
33  
34 nurses seeing the patient as a team member, they can create a psychologically safe  
35  
36 environment for the patients. Patients then are more likely to talk about their concerns, to  
37  
38 get an experience of interaction, and to feel safe in the EMS encounter.  
39  
40  
41

42  
43 O'Hara et al. have shown that most of the patients' safety experiences could not be classified  
44  
45 as patient safety issues or adverse events. Despite this, the authors noted that patients'  
46  
47 experiences offer a valuable perspective on how health care professionals can develop  
48  
49 safety and improve the patient encounter in health care.[21] In our study, we did not classify  
50  
51 patients' negative experiences as adverse events, and conversely, having a sense of safety  
52  
53 in the EMS is not the same as actually receiving safe care. However, based on patients'  
54  
55 experiences, valuable information emerged on how to improve patient safety and the patient  
56  
57 encounter in EMS. Some of the patients had experienced, especially with driving, a situation  
58  
59  
60

1  
2  
3 that could have compromised the safety of the patient and the prehospital nurse. Prehospital  
4  
5 nurses' communication (with the patient or other health care professional) and clinical  
6  
7 judgment were important when patients described what makes them feel safe when cared  
8  
9 for by prehospital nurses. Our findings were similar to those of a review study[31]. In that  
10  
11 study, patient safety issues in EMS were categorized into seven different themes: clinical  
12  
13 judgment, adverse events and error reporting, communications, ground vehicle safety,  
14  
15 aircraft safety, interfacility transport, and field intubation[31]. Furthermore, a study  
16  
17 conducted by Togher et al.[32] and also our study emphasizes the importance of a short  
18  
19 waiting time, patients' confidence in the prehospital nurses, and prehospital nurses'  
20  
21 professional skills and communication. Our study found that these factors also influence  
22  
23 patients' safety experience. Even a short waiting time has a marked impact on patients'  
24  
25 experience of safety in our study a short waiting time according to patients ranged from a  
26  
27 few to 30 minutes.  
28  
29  
30  
31  
32

33  
34 Overall, the interviewed patients appeared to feel safe in the EMS and to have confidence  
35  
36 in EMS personnel. Clearly, confidence in the care provider is the main factor affecting  
37  
38 patients' sense of safety in the EMS. In addition, medical knowledge and driving skills are  
39  
40 factors directly related to a positive safety experience for the patient. However, prehospital  
41  
42 nurses' professional competence and valid driving skills are meaningless in maintaining  
43  
44 patients' confidence if the nurse does not treat the patient in a fair and humane manner.  
45  
46 Therefore, prehospital nurses should become more aware of their social interactions with  
47  
48 patients and the importance of these interactions to patients' perception of safety.  
49  
50  
51

52  
53 The generic category *Factors affecting patients' sense of participation* reflects both the  
54  
55 "social process" or "a group level" and the "psychological dimension" or "an individual  
56  
57 level"[5,10,11] and the generic category *Contextual factors affecting care* reflects the  
58  
59 "organizational dimension"[5,10,11] Our findings are in line with the inter-related layers  
60

1  
2  
3 described in patient safety culture and safety culture[5,10,11], but also highlight the gap  
4  
5 between what patient safety means to the prehospital nurse or the EMS organization and  
6  
7 what patient safety means to the patient. Furthermore, based on this study and a former  
8  
9 study[33], prehospital nurses, EMS organizations, and vocational training providers need  
10  
11 additional knowledge about other factors affecting patients' safety experience in the EMS.  
12  
13 Prehospital nurses require more education to improve their social skills and to be able to  
14  
15 foster psychological safety for the patient. The curriculum in nurse training should thus be  
16  
17 expanded to include development of social skills.  
18  
19  
20  
21  
22

### 23 **Study strengths and limitations**

24  
25 It could be a strength or a limitation that the researchers had a deep pre-understanding of  
26  
27 the research topic. Deep theoretical and clinical experience helps to understand patients'  
28  
29 experiences of the EMS and also to put these into a clinical context. However, this could  
30  
31 also cause a bias via a lack of openness to the subject. To reduce this potential bias, we  
32  
33 move back and forward between the interviews and the expressions and between the  
34  
35 categories and the interviews during the analysis. Also, one of the researchers had no  
36  
37 experience with EMS, but had working knowledge of patient safety, and this reduced the  
38  
39 risk of bias caused by preconceptions.  
40  
41  
42  
43

44  
45 The patients were recruited from only one health care district area, which could reduce  
46  
47 extrapolation of the results. However, patients' characteristics cover the most common EMS  
48  
49 patient groups according to the ERC official statistics. Another limitation is the exclusion  
50  
51 criteria; the excluded patients could have valuable insight into how they experience safety  
52  
53 when prehospital nurses must use much support equipment and different kinds of transfer  
54  
55 methods.  
56  
57  
58  
59  
60

1  
2  
3 The interviews were performed when the patient was admitted to the ED. This may also be  
4 considered a limitation or a strength: a limitation due to the patient's experiences of illness,  
5 a strength due to their memory of the prehospital nurses and the EMS encounter being fresh  
6 and unaffected by other people's opinions. Because of the timing of the interviews, one  
7 might assume that the care in the EMS was still in patients' recent memory. The short  
8 duration of the interviews may be a limitation. The reason for short interviews was often the  
9 patient's illness or fatigue or the limited experience of the interviewer. However, the  
10 interviewer approached the subject with an open question and continued with more specific  
11 questions. Therefore, the interviews concluded when no new information emerged.  
12  
13  
14  
15  
16  
17  
18  
19  
20  
21  
22

23  
24 Even if the interviews were done alone with the patient, it is possible that the patients were  
25 hesitant to openly share their views. There could have been barriers to the patients  
26 disclosing their concerns caused by for instance "I do not want to be a troublemaker", "I  
27 don't know how to raise my concern", or "I do not want to harm my relationship with members  
28 of the medical team"[34]. To reduce these concerns, the interviewer introduced herself as a  
29 researcher, wore casual attire, and informed the patient that interviews are analysed  
30 anonymously. Moreover, we informed the patients that participating or withdrawing or  
31 anything that they say will not influence their treatment in the hospital or EMS. Despite  
32 certain limitations, this study offers valuable insights into patients' experience of safety in  
33 EMS.  
34  
35  
36  
37  
38  
39  
40  
41  
42  
43  
44  
45  
46  
47  
48

## 49 **CONCLUSIONS**

50  
51 Prehospital nurses' social interactions seem to be associated with patients' experience of  
52 safety. Thus, more attention should be directed to prehospital nurses' social skills and their  
53 ability to create a psychologically safe environment for the patient. In addition, this study  
54 adds knowledge about the factors contributing to or reducing patients' perception of safety  
55  
56  
57  
58  
59  
60

1  
2  
3 when attended to by prehospital nurses. This information is valuable for development of  
4  
5 EMS organizations and protocols, improving their quality and safety performance. However,  
6  
7 EMS organizations and prehospital nurses must continue to develop the other elements of  
8  
9 patient safety in the EMS.  
10  
11  
12  
13

## 14 **ACKNOWLEDGEMENTS**

15  
16 We thank the EMS patients who shared their experiences with us. We also thank the  
17  
18 emergency department nurses for valuable help in recruiting patients.  
19  
20  
21

## 22 **CONFLICT OF INTEREST**

23  
24 All authors declare that they have no competing interests.  
25  
26  
27

## 28 **AUTHORS' CONTRIBUTIONS**

29  
30 All authors contributed to this study as follows: study design (AV, VL, MC), data collection  
31  
32 (AV), data analysis (AV, VL, ST), and writing the manuscript (AV, VL, MC, ST). All authors  
33  
34 read and approved the final manuscript.  
35  
36  
37

## 38 **FUNDING**

39  
40 Funding was provided by Finnish State Research Funding.  
41  
42  
43

## 44 **AVAILABILITY OF DATA AND MATERIAL**

45  
46 The data used and analysed during the study are available from the corresponding author  
47  
48 on reasonable request.  
49  
50  
51

## 52 **CONCENT FOR PUBLICATION**

53  
54 Not applicable.  
55  
56  
57  
58  
59  
60

## REFERENCES

1. Institute of Medicine (US) Committee on Quality of Health Care in America; Kohn LT, Corrigan JM, Donaldson MS, eds. *To Err is Human: Building a Safer Health System*. Washington (DC): National Academies Press (US); 2000. doi:10.17226/9728.
2. World Health Organization. Exploring patient participation in reducing health-care related safety risks. World Health Organization, Copenhagen. 2013. Available from: [http://www.euro.who.int/\\_\\_data/assets/pdf\\_file/0010/185779/e96814.pdf](http://www.euro.who.int/__data/assets/pdf_file/0010/185779/e96814.pdf) Accessed: 15 November 2019.
3. World Health Organization. Patient engagement. Technical series on safer primary care. Geneva: WHO, 2016. Available from: <https://apps.who.int/iris/bitstream/handle/10665/252269/9789241511629-eng.pdf>. Accessed: 15 November 2019.
4. Vincent C, Burnett S, Carthey J. Safety measurement and monitoring in healthcare: A framework to guide clinical teams and healthcare organizations in maintaining safety. *BMJ Qual Saf* 2014;23:670-677. doi:10.1136/bmjqs-2013-002757.
5. Reiman T, Pietikäinen E, Oedewald P. Multilayered approach to patient safety culture. *Qual Saf Health Care* 2010;19. doi:10.1136/qshc.2008.029793.
6. Pietikäinen E, Reiman T, Oedewald P. Turvallisuuskulttuurityö organisaation toiminnan kehittämisenä terveydenhuollossa. VTT Tiedotteita - Research Notes 2456. 2008. Available from: <https://www.vtt.fi/inf/pdf/tiedotteet/2008/T2456.pdf>. Accessed: 15 November 2019.
7. Flin R. Measuring safety culture in healthcare: A case for accurate diagnosis. *Saf Sci*. 2007;45:653-667 doi:10.1016/j.ssci.2007.04.003.
8. Holgate R. The opinion of emergency medical service personnel regarding safety in pre-hospital emergency care practice. Johannesburg: University of the Witwatersrand, 2015. Available from: <https://pdfs.semanticscholar.org/fbb6/a55bfbf33da065422982f16a79de87fd8a46.pdf>. Accessed: 15 November 2019.



- 1  
2  
3 9. Weaver SJ, Lubomksi LH, Wilson RF, Pfoh ER, Martinez KA, Dy SM. Promoting a  
4 culture of safety as a patient safety strategy: a systematic review. *Ann Intern Med*.  
5 2013;158:369–374. doi:10.7326/0003-4819-158-5-201303051-00002.  
6  
7
- 8  
9 10. Guldenmund FW. Understanding and exploring safety culture. Oisterwijk: BOXPress.  
10 2010:74-85.  
11  
12
- 13  
14 11. Reiman T, Pietikäinen E, Oedewald P. Turvallisuuskulttuuri: Teoria ja arviointi. Espoo:  
15 VTT Technical Research Centre of Finland, 2008. VTT Publications;No. 700. Available  
16 from: <http://www.vtt.fi/inf/pdf/publications/2008/P700.pdf> Accessed: 15 November 2019.  
17  
18
- 19  
20 12. Auvinen P, Palukka H, Tiilikka T. Palvelujärjestelmä murroksessa - ensihoidon ja  
21 sairaankuljetuksen työ- ja toimintakäytänteet. Juvenes print – Tampereen Yliopistopaino  
22 Oy. 2012. Available from: <http://urn.fi/URN:ISBN:978-951-44-9018-7> Accessed: 15  
23 November 2019.  
24  
25
- 26  
27 13. Brice JH, Studnek JR, Bigham BL, et al. EMS provider and patient safety during  
28 response and transport: Proceedings of an ambulance safety conference. *Prehosp Emerg*  
29 *Care*. 2012;16:3-19. doi:10.3109/10903127.2011.626106.  
30  
31
- 32  
33 14. Salminen-Tuomaala M, Leikkola P, Paavilainen E. Patient and staff safety incidents  
34 and near misses in out-of-hospital emergency care. *Emergency Med* 2014;4:219.  
35 doi:10.4172/2165-7548.1000219.  
36  
37
- 38  
39 15. Salminen-Tuomaala M, Leikkola P, Paavilainen E. Emergency health care  
40 professionals' experiences of factors that influence care quality and safety. *Clin Nurs Stud*.  
41 2015;3:60-68. doi:10.5430/cns.v3n3p60.  
42  
43
- 44  
45 16. Bigham BL, Buick JE, Brooks SC, Morrison M, Shojanian KG, Morrison LJ. Patient  
46 safety in emergency medical services: A systematic review of the literature. *Prehosp*  
47 *Emerg Care*. 2012;16:20-35 doi:10.3109/10903127.2011.621045.  
48  
49
- 50  
51 17. Coster JE, Irving AD, Turner JK, Phung VH, Siriwardena AN. Prioritizing novel and  
52 existing ambulance performance measures through expert and lay consensus: A three-  
53 stage multimethod consensus study. *Health Expect*. 2018;21:249–260.  
54  
55
- 56  
57 doi:10.1111/hex.12610.  
58  
59  
60

- 1  
2  
3 18. Fairbanks RJ, Crittenden CN, O'Gara KG, et al. Emergency medical services provider  
4 perceptions of the nature of adverse events and near-misses in out-of-hospital care: An  
5 ethnographic view. *Acad Emerg Med*. 2008;15:633-640. doi:10.1111/j.1553-  
6 2712.2008.00147.x.  
7  
8  
9  
10  
11 19. Rainey H, Ehrich K, Mackintosh N, Sandall J. The role of patients and their relatives in  
12 'speaking up' about their own safety - a qualitative study of acute illness. *Health Expect*.  
13 2015;18:392-405. doi: 10.1111/hex.12044.  
14  
15  
16  
17 20. Sahlström M, Partanen P, Azimirad M, Selander T, Turunen H. Patient participation in  
18 patient safety—An exploration of promoting factors. *J Nurs Manag*. 2019;27:84-92. doi:  
19 10.1111/jonm.12651.  
20  
21  
22  
23 21. Lawton R, O'Hara JK, Sheard L, et al. Can patient involvement improve patient safety?  
24 A cluster randomised control trial of the patient reporting and action for a safe environment  
25 (PRASE) intervention. *BMJ Qual Saf*. 2017;26:622-631. doi:10.1136/bmjqs-2016-005570.  
26  
27  
28  
29 22. McTier L, Botti M, Duke M. Patient participation in medication safety during an acute  
30 care admission. *Health Expect*. 2015;18:1744-1756. doi:10.1111/hex.12167.  
31  
32  
33  
34 23. Health Care Act 1326:2010. Ministry of Social Affairs and Health, Finland. 2013.  
35  
36  
37 24. Ministry of Social Affairs and Health decree of prehospital emergency care 585:2017.  
38 Ministry of Social Affairs and Health, Finland. 2017.  
39  
40  
41  
42 25. Patton MQ. *Qualitative research and evaluation methods: Integrating theory and*  
43 *practice*. Fourth edition ed. California, United States of America: SAGE Publications, Inc.;  
44 2015:52-53.  
45  
46  
47  
48 26. Elo S, Kyngäs H. The qualitative content analysis process. *J Adv Nurs*. 2008;62:107-  
49 115. doi:10.1111/j.1365-2648.2007.04569.x.  
50  
51  
52  
53 27. Bishop AC, Macdonald M. Patient involvement in patient safety: A qualitative study of  
54 nursing staff and patient perceptions. *J Patient Saf*. 2017;13:82-87.  
55 doi:10.1097/PTS.000000000000123.  
56  
57  
58  
59  
60

- 1  
2  
3 28. Ahlenius M, Lindström V, Vicente V. Patients' experience of being badly treated in the  
4 ambulance service: A qualitative study of deviation reports in Sweden. *Int Emerg Nurs*.  
5 2017;30:25-30 doi:10.1016/j.ienj.2016.07.004.  
6  
7  
8  
9 29. Edmondson, A. "Psychological Safety, Trust and Learning: A Group-level Lens." In:  
10 Kramer R., Cook K. eds. *Trust and Distrust in Organizations: Dilemmas and Approaches*,  
11 239–272. New York: Russell Sage Foundation. 2004.  
12  
13  
14  
15 30. Ahl C, Nyström M. To handle the unexpected - the meaning of caring in pre-hospital  
16 emergency care. *Int Emerg Nurs*. 2012;20:33-41. doi:10.1016/j.ienj.2011.03.001.  
17  
18  
19  
20 31. Bigham BL, Bull E, Morrison M, et al. Patient safety in emergency medical services:  
21 Executive summary and recommendations from the niagara summit. *CJEM*. 2011;13:13-  
22 18. doi:10.2310/8000.2011.100232.  
23  
24  
25  
26 32. Togher FJ, O'Cathain A, Phung V-, Turner J, Siriwardena AN. Reassurance as a key  
27 outcome valued by emergency ambulance service users: A qualitative interview study.  
28 *Health Expect*. 2015;18:2951-2961. doi:10.1111/hex.12279.  
29  
30  
31  
32 33. Sjölin H, Lindström V, Hult H, Ringsted C, Kurland L. What an ambulance nurse needs  
33 to know: A content analysis of curricula in the specialist nursing programme in prehospital  
34 emergency care. *Int Emerg Nurs*. 2015;23:127-132. doi:10.1016/j.ienj.2014.09.002.  
35  
36  
37  
38 34. Bell SK, Roche SD, Mueller A, et al. Speaking up about care concerns in the ICU:  
39 Patient and family experiences, attitudes and perceived barriers. *BMJ Qual Saf*.  
40 2018;27:928-936. doi:10.1136/bmjqs-2017-007525.  
41  
42  
43  
44  
45  
46  
47  
48  
49  
50  
51  
52  
53  
54  
55  
56  
57  
58  
59  
60

1  
2  
3  
4  
5  
6  
7 I, the Submitting Author has the right to grant and does grant on behalf of all authors of the Work (as  
8 defined in the below author licence), an exclusive licence and/or a non-exclusive licence for  
9 contributions from authors who are: i) UK Crown employees; ii) where BMJ has agreed a CC-BY  
10 licence shall apply, and/or iii) in accordance with the terms applicable for US Federal Government  
11 officers or employees acting as part of their official duties; on a worldwide, perpetual, irrevocable,  
12 royalty-free basis to BMJ Publishing Group Ltd ("BMJ") its licensees and where the relevant Journal is  
13 co-owned by BMJ to the co-owners of the Journal, to publish the Work in BMJ Open and any other BMJ  
14 products and to exploit all rights, as set out in our [licence](#).

15  
16 The Submitting Author accepts and understands that any supply made under these terms is made by  
17 BMJ to the Submitting Author unless you are acting as an employee on behalf of your employer or a  
18 postgraduate student of an affiliated institution which is paying any applicable article publishing charge  
19 ("APC") for Open Access articles. Where the Submitting Author wishes to make the Work available on  
20 an Open Access basis (and intends to pay the relevant APC), the terms of reuse of such Open Access  
21 shall be governed by a Creative Commons licence – details of these licences and which [Creative](#)  
22 [Commons](#) licence will apply to this Work are set out in our licence referred to above.  
23  
24  
25  
26  
27  
28  
29  
30  
31  
32  
33  
34  
35  
36  
37  
38  
39  
40  
41  
42  
43  
44  
45  
46  
47  
48  
49  
50  
51  
52  
53  
54  
55  
56  
57  
58  
59  
60

1  
2  
3  
4  
5  
6  
7  
8  
9  
10  
11  
12  
13  
14  
15  
16  
17  
18  
19  
20  
21  
22  
23  
24  
25  
26  
27  
28  
29  
30  
31  
32  
33  
34  
35  
36  
37  
38  
39  
40  
41  
42  
43  
44  
45  
46  
47  
48  
49  
50  
51  
52  
53  
54  
55  
56  
57  
58  
59  
60

For peer review only

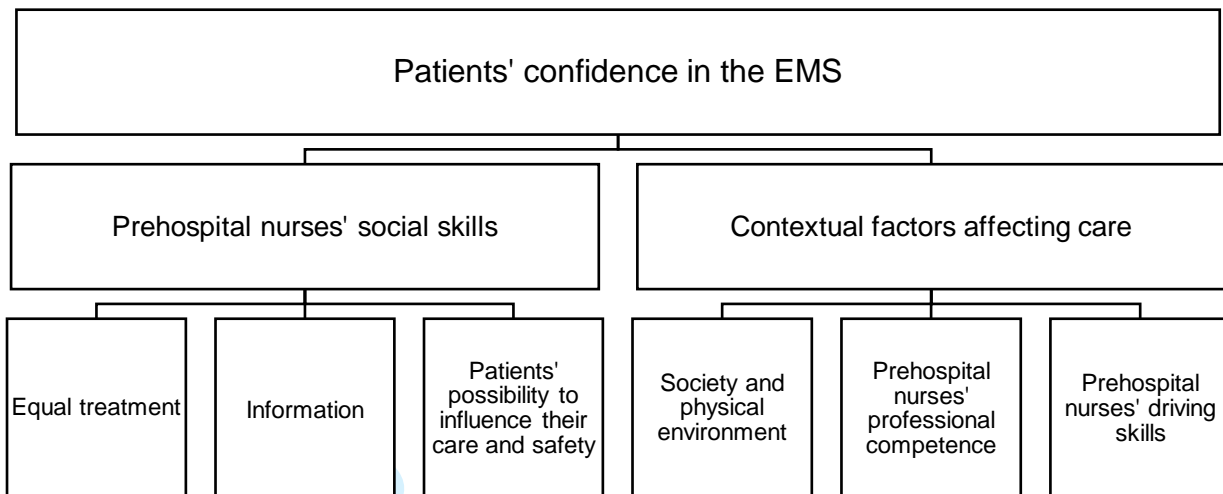

Figure 1. Patients' confidence in the EMS.

## COREQ (CONsolidated criteria for REporting Qualitative research) Checklist

A checklist of items that should be included in reports of qualitative research. You must report the page number in your manuscript where you consider each of the items listed in this checklist. If you have not included this information, either revise your manuscript accordingly before submitting or note N/A.

| Topic                                          | Item No. | Guide Questions/Description                                                                                                                              | Reported on Page No. |
|------------------------------------------------|----------|----------------------------------------------------------------------------------------------------------------------------------------------------------|----------------------|
| <b>Domain 1: Research team and reflexivity</b> |          |                                                                                                                                                          |                      |
| <i>Personal characteristics</i>                |          |                                                                                                                                                          |                      |
| Interviewer/facilitator                        | 1        | Which author/s conducted the interview or focus group?                                                                                                   |                      |
| Credentials                                    | 2        | What were the researcher's credentials? E.g. PhD, MD                                                                                                     |                      |
| Occupation                                     | 3        | What was their occupation at the time of the study?                                                                                                      |                      |
| Gender                                         | 4        | Was the researcher male or female?                                                                                                                       |                      |
| Experience and training                        | 5        | What experience or training did the researcher have?                                                                                                     |                      |
| <i>Relationship with participants</i>          |          |                                                                                                                                                          |                      |
| Relationship established                       | 6        | Was a relationship established prior to study commencement?                                                                                              |                      |
| Participant knowledge of the interviewer       | 7        | What did the participants know about the researcher? e.g. personal goals, reasons for doing the research                                                 |                      |
| Interviewer characteristics                    | 8        | What characteristics were reported about the interviewer/facilitator? e.g. Bias, assumptions, reasons and interests in the research topic                |                      |
| <b>Domain 2: Study design</b>                  |          |                                                                                                                                                          |                      |
| <i>Theoretical framework</i>                   |          |                                                                                                                                                          |                      |
| Methodological orientation and Theory          | 9        | What methodological orientation was stated to underpin the study? e.g. grounded theory, discourse analysis, ethnography, phenomenology, content analysis |                      |
| <i>Participant selection</i>                   |          |                                                                                                                                                          |                      |
| Sampling                                       | 10       | How were participants selected? e.g. purposive, convenience, consecutive, snowball                                                                       |                      |
| Method of approach                             | 11       | How were participants approached? e.g. face-to-face, telephone, mail, email                                                                              |                      |
| Sample size                                    | 12       | How many participants were in the study?                                                                                                                 |                      |
| Non-participation                              | 13       | How many people refused to participate or dropped out? Reasons?                                                                                          |                      |
| <i>Setting</i>                                 |          |                                                                                                                                                          |                      |
| Setting of data collection                     | 14       | Where was the data collected? e.g. home, clinic, workplace                                                                                               |                      |
| Presence of non-participants                   | 15       | Was anyone else present besides the participants and researchers?                                                                                        |                      |
| Description of sample                          | 16       | What are the important characteristics of the sample? e.g. demographic data, date                                                                        |                      |
| <i>Data collection</i>                         |          |                                                                                                                                                          |                      |
| Interview guide                                | 17       | Were questions, prompts, guides provided by the authors? Was it pilot tested?                                                                            |                      |
| Repeat interviews                              | 18       | Were repeat interviews carried out? If yes, how many?                                                                                                    |                      |
| Audio/visual recording                         | 19       | Did the research use audio or visual recording to collect the data?                                                                                      |                      |
| Field notes                                    | 20       | Were field notes made during and/or after the interview or focus group?                                                                                  |                      |
| Duration                                       | 21       | What was the duration of the interviews or focus group?                                                                                                  |                      |
| Data saturation                                | 22       | Was data saturation discussed?                                                                                                                           |                      |
| Transcripts returned                           | 23       | Were transcripts returned to participants for comment and/or                                                                                             |                      |

| Topic                                  | Item No. | Guide Questions/Description                                                                                                        | Reported on Page No. |
|----------------------------------------|----------|------------------------------------------------------------------------------------------------------------------------------------|----------------------|
|                                        |          | correction?                                                                                                                        |                      |
| <b>Domain 3: analysis and findings</b> |          |                                                                                                                                    |                      |
| <i>Data analysis</i>                   |          |                                                                                                                                    |                      |
| Number of data coders                  | 24       | How many data coders coded the data?                                                                                               |                      |
| Description of the coding tree         | 25       | Did authors provide a description of the coding tree?                                                                              |                      |
| Derivation of themes                   | 26       | Were themes identified in advance or derived from the data?                                                                        |                      |
| Software                               | 27       | What software, if applicable, was used to manage the data?                                                                         |                      |
| Participant checking                   | 28       | Did participants provide feedback on the findings?                                                                                 |                      |
| <i>Reporting</i>                       |          |                                                                                                                                    |                      |
| Quotations presented                   | 29       | Were participant quotations presented to illustrate the themes/findings?<br>Was each quotation identified? e.g. participant number |                      |
| Data and findings consistent           | 30       | Was there consistency between the data presented and the findings?                                                                 |                      |
| Clarity of major themes                | 31       | Were major themes clearly presented in the findings?                                                                               |                      |
| Clarity of minor themes                | 32       | Is there a description of diverse cases or discussion of minor themes?                                                             |                      |

Developed from: Tong A, Sainsbury P, Craig J. Consolidated criteria for reporting qualitative research (COREQ): a 32-item checklist for interviews and focus groups. *International Journal for Quality in Health Care*. 2007. Volume 19, Number 6: pp. 349 – 357

**Once you have completed this checklist, please save a copy and upload it as part of your submission. DO NOT include this checklist as part of the main manuscript document. It must be uploaded as a separate file.**



# BMJ Open

## PATIENTS' SENSE OF THEIR SAFETY IN EMERGENCY MEDICAL SERVICES – AN INTERVIEW STUDY

|                                 |                                                                                                                                                                                                                                                                                                                                                                                                                                                                                                                                                                                                                                                                    |
|---------------------------------|--------------------------------------------------------------------------------------------------------------------------------------------------------------------------------------------------------------------------------------------------------------------------------------------------------------------------------------------------------------------------------------------------------------------------------------------------------------------------------------------------------------------------------------------------------------------------------------------------------------------------------------------------------------------|
| Journal:                        | <i>BMJ Open</i>                                                                                                                                                                                                                                                                                                                                                                                                                                                                                                                                                                                                                                                    |
| Manuscript ID                   | bmjopen-2020-037488.R1                                                                                                                                                                                                                                                                                                                                                                                                                                                                                                                                                                                                                                             |
| Article Type:                   | Original research                                                                                                                                                                                                                                                                                                                                                                                                                                                                                                                                                                                                                                                  |
| Date Submitted by the Author:   | 08-Jun-2020                                                                                                                                                                                                                                                                                                                                                                                                                                                                                                                                                                                                                                                        |
| Complete List of Authors:       | Venesoja, Anu; South Karelia Social and Health Care District, Acute care unit; Department of Emergency Medicine and Services, Helsinki University Hospital, Helsinki University, Department of Emergency Medicine and Services<br>Castrén, Maaret; Department of Emergency Medicine and Services, Helsinki University Hospital, Helsinki University, Department of Emergency Medicine and Services<br>Tella, Susanna; LAB University of Applied Sciences; University of Eastern Finland Faculty of Health Sciences<br>Lindström, Veronica ; Karolinska Institutet, Department of Neurobiology, Care Sciences and Society, section of Nursing); Samariten Ambulance |
| <b>Primary Subject Heading</b>: | Nursing                                                                                                                                                                                                                                                                                                                                                                                                                                                                                                                                                                                                                                                            |
| Secondary Subject Heading:      | Emergency medicine, Qualitative research                                                                                                                                                                                                                                                                                                                                                                                                                                                                                                                                                                                                                           |
| Keywords:                       | ACCIDENT & EMERGENCY MEDICINE, QUALITATIVE RESEARCH, Health & safety < HEALTH SERVICES ADMINISTRATION & MANAGEMENT                                                                                                                                                                                                                                                                                                                                                                                                                                                                                                                                                 |
|                                 |                                                                                                                                                                                                                                                                                                                                                                                                                                                                                                                                                                                                                                                                    |

SCHOLARONE™  
Manuscripts

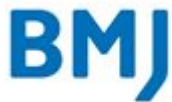

I, the Submitting Author has the right to grant and does grant on behalf of all authors of the Work (as defined in the below author licence), an exclusive licence and/or a non-exclusive licence for contributions from authors who are: i) UK Crown employees; ii) where BMJ has agreed a CC-BY licence shall apply, and/or iii) in accordance with the terms applicable for US Federal Government officers or employees acting as part of their official duties; on a worldwide, perpetual, irrevocable, royalty-free basis to BMJ Publishing Group Ltd ("BMJ") its licensees and where the relevant Journal is co-owned by BMJ to the co-owners of the Journal, to publish the Work in this journal and any other BMJ products and to exploit all rights, as set out in our [licence](#).

The Submitting Author accepts and understands that any supply made under these terms is made by BMJ to the Submitting Author unless you are acting as an employee on behalf of your employer or a postgraduate student of an affiliated institution which is paying any applicable article publishing charge ("APC") for Open Access articles. Where the Submitting Author wishes to make the Work available on an Open Access basis (and intends to pay the relevant APC), the terms of reuse of such Open Access shall be governed by a Creative Commons licence – details of these licences and which [Creative Commons](#) licence will apply to this Work are set out in our licence referred to above.

Other than as permitted in any relevant BMJ Author's Self Archiving Policies, I confirm this Work has not been accepted for publication elsewhere, is not being considered for publication elsewhere and does not duplicate material already published. I confirm all authors consent to publication of this Work and authorise the granting of this licence.

1  
2  
3  
4  
5 **PATIENTS' SENSE OF THEIR SAFETY IN EMERGENCY MEDICAL SERVICES –**  
6  
7 **AN INTERVIEW STUDY**  
8  
9

10 Anu Venesoja, RN, MHSc, PhD-student <sup>1,2</sup>; Maaret Castrén, MD, PhD <sup>2</sup>; Susanna Tella,  
11 RN, PhD <sup>3,4</sup>; Veronica Lindström, RN, PhD <sup>5,6</sup>  
12  
13  
14  
15

16  
17 <sup>1</sup> South Carelia Social and Healthcare District, Finland; <sup>2</sup> Department of Emergency  
18 Medicine and Services, Helsinki University Hospital, Helsinki University, Helsinki, Finland;  
19 <sup>3</sup> Samariten Ambulance, Stockholm, Sweden; <sup>4</sup> Karolinska Institutet, Department of  
20 Neurobiology, Care Sciences, and Society Division of Nursing Stockholm, Sweden <sup>5</sup> LAB  
21 University of Applied Sciences, Finland; <sup>6</sup> University of Eastern Finland.  
22  
23  
24  
25  
26  
27

28 **Short running title:** EMS patients' experiences of safety  
29  
30

31  
32 **Corresponding author:**  
33

34 Anu Venesoja  
35

36 Address: Timonkatu 29, FI-55100 Imatra, Finland  
37

38 E-mail: [anu.venesoja@helsinki.fi](mailto:anu.venesoja@helsinki.fi)  
39

40 Telephone: +358-405575824  
41  
42  
43  
44

45 Word count: 4647  
46  
47  
48  
49  
50  
51  
52  
53  
54  
55  
56  
57  
58  
59  
60

# PATIENTS' SENSE OF THEIR SAFETY IN EMERGENCY MEDICAL SERVICES

## – AN INTERVIEW STUDY

### ABSTRACT

**Background:** Research on patient safety in Emergency Medical Services (EMS) has mainly focused on the organization's and/or the EMS personnel's perspective. Little is known about how patients experience sense of safety in EMS. This study aims to describe the patients' experiences of their sense of safety in EMS.

**Methods:** A qualitative design with individual interviews of EMS patients (n=21) and an inductive qualitative content analysis were used.

**Results:** Patients' experiences of EMS personnel ability or inability to show or use their medical, technical, and driving skills affected the patients' sense of safety. When patients perceived a lack of professionalism and knowledge among EMS personnel, the patients felt unsafe. Patients highlighted equality in the encounter, the quality of the information given by EMS personnel, and the opportunity to participate in the care as important factors creating a sense of safety during the EMS encounter. Altogether, patients' experiences of sense of safety in EMS were connected to their confidence in the EMS personnel.

**Conclusions:** Overall, patients felt safe during their EMS encounter, but the EMS personnel professional competence alone is not enough for patients to feel safe. Lack of communication or professionalism may compromise patients' sense of safety. Further work is needed to explore how patients' experiences of sense of safety can be utilize in improving safety in EMS.

**Keywords:** Ambulance service; patient experience; qualitative study; safety; prehospital nurse

## Strengths and limitations of this study

- The strengths are that detailed, rich information about patients' own experiences in their own words was gained.
- With this study, it was possible to gain knowledge about what patients consider important for feeling safe in the EMS.
- Interviews offered the opportunity to gain knowledge about safety in the EMS from the patients' perspective.
- A limitation is that the interviews were done in a small hospital district, which could limit the transferability of the results.

## BACKGROUND

"To err is human"[1], but it can at worst cause disastrous results for patients seeking care and for the organization caring for the patients. Therefore, systematic development and research are needed to ensure and improve patient safety and quality of care. Errors are described as being usually caused by faulty systems, processes, or conditions in the organization rather than by individual health care workers, and thus, all health care actors, including patients, should be involved in developing the safety culture in health care. Global recommendations and guidelines to improve patient safety include the patients as active team members whenever possible[1-3]. Patients' experiences of difficulties and harms can provide information about safety, which is not obvious to healthcare staff[4].

The World Health Organization (WHO) has defined the term safety culture as *the product of individual and group values, attitudes, perceptions, competencies, and patterns of behavior that determine the commitment to, and the style and proficiency of, an organization's health and safety management*. Another WHO's definition for safety culture is *an integrated pattern of individual and organizational behavior, based upon shared beliefs and values, that continuously seeks to minimize patient harm which may result from the processes of care delivery*. [5] When researchers use the term "patient safety culture", they define sections of safety culture which have an impact to patient safety. [6-9] Considering this relationship between safety culture and patient safety culture, it is essential to recognize how this relationship affect the patients' experience of sense of safety. In this study, safety in emergency medical services (EMS) is explored from the patients' perspective. The EMS includes health care professionals who respond to emergency calls, assessing, treating and transporting patients to health care providers such as the emergency department (ED).

## **Safety and patient safety in emergency medical services**

EMS in its nature can be considered a challenging and constantly changing environment compared with other emergency care settings such as hospitals. The hospital environment is especially built for patient care whereas the EMS personnel treat the patients in their homes, in public, inside the ambulance or outdoors. The not always predictable environment in EMS could compromise both EMS personnel and patients' safety.

Transporting a patient to hospital by ambulance could also be a hazardous situation. The risks of traffic accidents are known to increase if driving with lights and sirens [10-11].

There is some evidence that safety culture and patient and EMS provider safety outcomes are interrelated. It is studied that EMS personnel who reported an error or adverse event (AE) evaluate safety culture lower than those who did not give affirmative response for an error or AE. Furthermore, EMS personnel who reported safety-compromising behavior evaluate safety culture lower than those who did not report safety-compromising behavior.[12]

Otherwise, patient safety studies within the EMS setting have mainly investigated AE, mishaps, near-misses, occupational hazards, and patient safety or quality of care, and these previous studies have mainly focused on the organization's or EMS's personnel perspective and have not included the patients' point of view on safety[13-17]. Patient safety from the patients' viewpoint has mainly been investigated in hospital settings, showing that patients give valuable insights into improving or assessing patient safety[18-20]. As the EMS personnel sometimes has to work in a challenging environment, including risks of driving hazards, there is a need to investigate the patients' experiences of sense of safety in the EMS. Therefore, the aim of this study was to describe the patients' experiences of their sense of safety in the EMS.

## METHODS

A qualitative study design with individual interviews was used to explore patients' experiences of sense of their safety in the EMS.

### Setting

This study was carried out in Finland, where the Hospital Districts are responsible for organizing the EMS. During the study period, there were 21 Hospital Districts and they can produce the EMS by themselves, or they can purchase the EMS from the other party, for example for the rescue departments, other hospital district or private companies. The EMS consists of advanced-level ambulances, usually responding to high priority tasks, staffed with personnel who has the knowledge to make advanced assessment of the patient, initiating treatment, symptom alleviation and if necessary, transport the patient to the next level of care. There are also basic-level ambulances, usually responding to low priority tasks, staffed with personnel who can assess the patients' vital signs, initiating basic cardio-pulmonary resuscitation. The advanced-level ambulances is staffed with two prehospital nurses or one prehospital nurse and another qualified person, e.g. nurse or other health care professional or rescue worker. The education level among advanced-level prehospital nurses is at least a registered nurse (3.5 years) with advanced life support education (one year alongside the work) or a prehospital nurse (4 years). Basic-level ambulances are manned by at least one emergency medical technician (EMT)[21,22]. In addition, every hospital district must have at least one EMS officer (operational supervisor of the shift, participates in challenging tasks) who is an advanced-level prehospital nurse with operative leadership education (for example Masters' degree or one-year operational leadership education) and leadership experience. The highest educated EMS personnel is always responsible for patient care, but when the patient is assessed as low priority, a nurse, EMT, or other health care professional can attend to the patient during transport.



1  
2  
3 This study was carried out in eastern Finland, a health care district covering approximately  
4  
5 132 000 inhabitants. There is one central hospital in the district and ambulance services  
6  
7 covers an area 6872.10 km<sup>2</sup>, including both rural and urban regions. Ambulance transports  
8  
9 vary between 1 and over 100 km. In 2017, there were about 22 100 EMS requests in the  
10  
11 area according to official statistics. At present (in 2018), there are one EMS officer, 11  
12  
13 ambulances, all of them are advanced level ambulances, and in addition there are two units  
14  
15 with the assignments to treat and evaluate low priority patients at home. The units have the  
16  
17 same equipment as the ambulance and point-of-care devices, but they are not capable of  
18  
19 transporting the patient.  
20  
21  
22  
23  
24

### 25 **Data collection and participants**

26  
27 Data collection was undertaken at the central hospital ED, where patients are transported  
28  
29 by EMS. Data were collected via semi-structured interviews during two-week period in  
30  
31 March 2018. The interviews were conducted by the first author, a prehospital nurse with 20  
32  
33 years' working experience in the EMS, who has not had any professional or personal  
34  
35 contact with the participants beforehand. Purposeful sampling [23] was used, aiming to  
36  
37 achieve variation among participants without risking patient safety. The inclusion criteria  
38  
39 were as follows: the patient was transported by the EMS to the ED after an emergency call  
40  
41 to the emergency response centre (ERC). The patient was assessed as low priority in the  
42  
43 ED or the patient was transported to the hospital as high priority, but the priority was  
44  
45 assessed as low after treatment in the ED. The patients needing urgent treatment in the  
46  
47 ED, patients under the influence of alcohol (based on ED nurses' assessment) or drugs  
48  
49 and inter-hospital transports was excluded. Additional exclusion criteria were age being a  
50  
51 minor, incapable of communicating in Finnish, or presence of dementia, confusion, or  
52  
53 terminal disease. ED nurses identified eligible participants. The first author received a list  
54  
55 of eligible participants from the ED nurse. The first author gave oral and written information  
56  
57  
58  
59  
60

1  
2  
3 about the study and asked about participation after patients had received their initial  
4  
5 assessment and treatment at the ED.  
6  
7

8 All interviews were performed during weekdays during daytime (between 8 am to 4 pm),  
9  
10 although some of the interviewed patients had been transported to the ED in the night-time.  
11  
12 The first, second, and last authors (the first and last authors with working experience in EMS  
13  
14 as prehospital nurses, and the second author with experience as an EMS physician)  
15  
16 together devised the interview questions. The interviews started with an open-ended  
17  
18 question “*Can you tell me about your experience of the EMS encounter?*” To encourage  
19  
20 patients to share their experiences, additional questions were asked concerning waiting  
21  
22 time, assessment, treatment, transportation, and the handover at the ED. The interviews  
23  
24 concluded by asking the patients to describe what made them feel safe or insecure during  
25  
26 the EMS encounter. The interview guide is presented in supplementary file 1. Continuous  
27  
28 discussions among the authors were done during the data collection. The interviews lasted  
29  
30 between 10 and 20 minutes. The interviews continued until no new information was obtained  
31  
32 during the interviews. The variations in the interviews started to be limited during interview  
33  
34 15, but six more interviews were conducted aiming to ensure that no new variations would  
35  
36 emerge. All the interviews were recorded with a digital recorder and transcribed verbatim by  
37  
38 the first author. All the transcriptions were anonymised. Two of the interviews were  
39  
40 translated from Finnish into English to achieve transparency among all authors participating  
41  
42 in the study.  
43  
44  
45  
46  
47  
48  
49  
50

### 51 **Patient and public involvement**

52  
53 The patients or the public were not involved in the design and conduct of this study.  
54  
55  
56  
57  
58  
59  
60

## Data analysis

An inductive qualitative content analysis was used to analyse the data[24]. The analysis began after all interviews had been listened to and transcribed. The text was then read several times to obtain a sense of the whole and to identify the patients' expressions about their experiences of sense of safety in the EMS. The experiences were single words or short sentences. The third author, who had no experience in EMS, but had working knowledge of patient safety research, read the transcripts with the aim of increasing the reliability of the process and verifying the first phase of open coding. In the first phase of open coding, the expressions that were similar received the same open code. Coding was made without using any software for analysis. An example of the coding tree is presented in supplementary file 2.

After the open coding, the codes were collected into a coding sheet consisting of codes related to each other. These coding sheets were then abstracted into sub-categories, after which the sub-categories were grouped into generic categories and finally into the main category. During the analysis, there was a recurrent movement between the whole, the parts, and the whole. The authors were held multiple discussions to ensure the reliability and credibility of the analysis, keeping the balance between their pre-understanding and openness to the content during the analysis. In every phase, the analysis continued after consensus between the researchers was reached. The last phase in the analysis was the conceptualization of the results, displayed in Figure 1.

## Ethical considerations

This study was approved by the Ethics Committee of Helsinki University Hospital (HUS/3529/2017). The patients received written information about the purpose of the study with contact information for the responsible researcher, and they had the possibility to ask

the first author questions about the research. The patients filled out a form affirming their voluntary participation in the study. The patients were informed that they have the right to withdraw from the study at any phase. During the interviews, the first author observed the patients and discontinued the discussion if any changes occurred in the patient's physical or mental condition.

## RESULTS

In total, 22 patients were asked to participate, 21 of whom agreed to participate in the study. One male refused the interview without providing a reason. Some of the patients had used EMS more than once and for some of them, this was a first contact to the EMS. The main reason for seeking EMS care was cardiac-related symptoms or breathing difficulties, as displayed in Table 1. Two of the patients did not describe their health problem or the reason for requesting an ambulance.

Table 1. Description of patients.

|                                                | Female<br>n=12 | Male<br>n=9  |
|------------------------------------------------|----------------|--------------|
| Age range (mean)                               | 44–91 (74.5)   | 41–86 (68.1) |
| Transported from urban area                    | 7              | 5            |
| Transported from rural area                    | 5              | 4            |
| <i>Primary condition as patients described</i> |                |              |
| Breathing difficulties                         | 4              | 1            |
| Cardiac-related symptoms                       | 3              | 2            |

|                           |   |   |
|---------------------------|---|---|
| Gastrointestinal problems | 2 | 1 |
| Lower body pain           | 1 | 1 |
| Minor injury              | - | 2 |
| Neurological symptoms     | - | 2 |
| Missing data              | - | 2 |

The main category *Patients' confidence in the EMS* shows that the patients feel safe in the EMS and have confidence in EMS personnel. The patients' confidence in the EMS personnel were divided in two generic categories: *EMS personnel's social skills* and *circumstantial factors affecting patients' care*. EMS personnel social skills consist of subcategories *equal treatment*, *information* and *involvement in care decisions*. Circumstantial factors affecting patients' care be composed of subcategories *environmental factors*, *EMS personnel professional competence* and *EMS personnel driving skills*. (Figure 1). The generic categories with their sub-categories are presented below with illustrative quotations.

### **EMS personnel social skills**

The EMS personnel's social skills included from patient's perspective equality in the care, the possibility to get information, and opportunity to involve in their care affected patients' sense of safety in EMS. From the patients' point of view, equal treatment was not always the case among EMS personnel.

#### **Equal treatment**

According to the patients, equal treatment and a reliable patient-EMS personnel relationship generated a sense of safety in the EMS. The patients noted that it is essential that the EMS personnel's behaviour is calm, natural, and friendly. The patients expressed that a bit of

1  
2  
3 humour and small talk during the care lighten the atmosphere and help to create a good  
4  
5 patient-EMS personnel relationship.  
6  
7

8 *"They didn't feel like officials. They were like human to human." (Pt5)*  
9

10  
11 On the other hand, patients described feelings of condescending and insecurity in care when  
12  
13 the EMS personnel's behaviour created a sense of being rushed, when the personnel were  
14  
15 negative or too official, or when the personnel lacked communication skills. The patients  
16  
17 also stated that the EMS personnel did not always take their concerns seriously and  
18  
19 sometimes ignored them altogether. This was reflected in how patients described situations  
20  
21 where their mental and/or physical condition created a feeling of insecurity, e.g. if they had  
22  
23 difficulties with breathing, felt lonely, or had to wait for the ambulance for a long time. Feeling  
24  
25 insecure as a result of condescending treatment caused a sense of being unsafe among the  
26  
27 patients.  
28  
29  
30  
31

32 *"Waiting is the worst, especially if you are alone and there isn't anyone with you"*  
33

34 *(Pt6)*  
35  
36  
37

### 38 Information

39  
40 Most patients mentioned that the EMS personnel gave enough information about the  
41  
42 assessments, a student participant, environmental conditions, treatment, and medication as  
43  
44 well as about driving with lights and sirens on. In addition, if the EMS personnel had  
45  
46 contacted the hospital beforehand, the patients expressed that the information had  
47  
48 transferred to the hospital personnel. The patients describe that in these situations their  
49  
50 treatment in the hospital started smoothly and quickly. However, some patients described  
51  
52 not getting enough information. Usually, the lack of information concerned what the EMS  
53  
54 personnel has assessed and the assessments results or the patient's medication during  
55  
56 care. Even these patients maintained confidence in the EMS personnel and their  
57  
58  
59  
60

1  
2  
3 professionalism because of the feeling that they received help from EMS personnel. Lack of  
4  
5 information thus had negligible impact on patients' feelings of safety in the EMS.  
6  
7

8 *"Ambulance personnel interviewed me and they took all sorts of assessments and I*  
9 *don't know all the assessments they took"* (Pt13)  
10  
11  
12  
13

#### 14 Involvement in care decisions

15  
16 According to the patients, their involvement in care decisions varied. The patients' possibility  
17  
18 to affect their transport position had an impact on their sense of safety. Especially those  
19  
20 patients suffering from breathing problems stated that they wanted to sit on the seat rather  
21  
22 than lay on the stretcher even if they were placed in an upright position. However, EMS  
23  
24 personnel usually ignored this wish without explaining why it was not possible. Although  
25  
26 some of the patients said that they did not have the chance to affect how they were moved  
27  
28 to the ambulance or what position or where to stay during the transport, however they did  
29  
30 not automatically define this as a negative thing.  
31  
32  
33

34  
35 *"They didn't let me walk anymore, they were pushing (with the stretchers) the old*  
36 *granny ... it sort of gives a nice feeling that somebody is still taking care of the old*  
37 *granny"* (Pt5)  
38  
39  
40  
41  
42

43 In some situations regarding safety, the patients took an active role. For example, they  
44  
45 asked the EMS personnel to put safety belts on or they asked to reduce ambulance speed  
46  
47 if they felt that the speed compromised their safety.  
48  
49

50 *"I said that at least put the seatbelt on me. If you drive off the road, I fly out of here*  
51 *(from the stretchers) because I don't have the seatbelt on"* (Pt10)  
52  
53  
54  
55  
56  
57  
58  
59  
60

### Circumstantial factors affecting care

The patients feel that EMS provides an essential public safety function. They also described that the physical environment (e.g. road and weather conditions, ambulance suspension, and conditions inside the ambulance during the transport) affects their experience of sense of safety in the EMS. The EMS personnel's technical and driving skills were highlighted when the patients talked about their experiences of factors affecting the care and sense of safety in EMS.

#### Environmental factors

Environmental factors markedly affect patients' feelings of safety in EMS. The patients feel that EMS provides an essential public safety function. Almost all of the patients interviewed had some preconceived notions of how the EMS works, expectations based on their own experiences or on how the service has been described in the media. Quick response times increase patients' experience of sense of safety. However, the experience of quick response time varied between the patients. Patients described a feeling of relief and security when the EMS personnel arrived and brought help to them with good equipment. They mentioned that they felt safe while the ambulance transported them to hospital.

*"Because I know that every time when I call an ambulance, help is near" (Pt13)*

Some environmental issues reduced the patients' feeling of safety or made them uncomfortable. Bad, bumpy roads or poor suspension in the ambulance made patients feel worse during the transport. The experience of feeling bad increased if the temperature was too hot or too cold during the transport. Uncomfortable and narrow stretchers and difficulties in getting inside the ambulance impair the experience of the care.

*"Why did the ambulance have such bad and noisy suspension? Was the road so bad or was it the ambulance suspension?" (Pt10)*



### EMS personnel's professional competence

Patients stated that EMS personnel professional competence made them feel safe during care. According to the patients, good professional competence means asking questions related to their health problems, background information about previous illness, medication, home situation, etc., and taking a lot of assessments and giving medication when needed. These factors made the patients feel that the treatment had started immediately and that the EMS personnel were interested in their health problem. Furthermore, the patients mentioned that when the EMS personnel supervised and gave guidance to the student it also had an effect on the patient's experience of the EMS personnel's professional competence. Patients noted that the EMS personnel mainly had good professional competence from their point of view.

*"The guys inserted an IV (intravenous cannula) and did assessments. Very professional personnel inserted the IV into my forearm, so they are very well educated" (Pt11)*

*"They took care of me and measured my blood pressure and gave me the medication orally and that made me feel safe" (Pt8)*

However, some of the patients perceived that the EMS personnel lacked professional competence, and this affected their sense of safety. This situation occurred when the EMS personnel were uncertain of what had caused the patients' health problem or when the patient became aware that the EMS personnel had a lack of knowledge, e.g. when the only solution to the patients' problem in the EMS personnel's view was to transport the patient to the hospital. In addition, when the EMS personnel were unable to put in an IV, the patients interpreted it as a lack of professional competence. These factors made the patient feel uncertain and unsafe.

1  
2  
3 *"They said that they don't understand, and they brought me here (hospital)... they*  
4 *tried to insert an IV in my forearm and it failed" (Pt3)*  
5  
6  
7  
8

### 9 EMS personnel driving skills

10  
11 For the most part, the patients felt that the EMS personnel had good driving skills, reflected  
12 in "smooth and fast transportation" or not driving too fast. Furthermore, if the driver took  
13 notice of the weather and road conditions and adjusted the driving style to these, the patient  
14 had an impression of good driving skills and safe transportation. However, some of the  
15 patients felt unsafe and insecure if the ambulance speed was too high, especially if the  
16 weather conditions were bad or the roads were slippery or uneven.  
17  
18  
19  
20  
21  
22  
23

24  
25  
26 *"The hail was falling, it was the size of ping pong balls, and other cars had stopped*  
27 *at the roadside but the ambulance was going very fast" (Pt10)*  
28  
29  
30  
31

## 32 DISCUSSION

33  
34 Overall, the interviewed patients appeared to feel safe in the EMS and to have confidence  
35 in EMS personnel. Clearly, confidence in the care provider is the main factor affecting  
36 patients' sense of safety in the EMS. In addition, medical knowledge and driving skills are  
37 directly related to a positive sense of safety for the patient. However, the EMS personnel's  
38 professional competence and good driving skills are meaningless in maintaining the  
39 patients' confidence if the EMS personnel does not treat the patient in an equal and humane  
40 manner. Therefore, EMS personnel should become more aware of their social interactions  
41 with patients and the importance of these interactions to patients' perception of safety. In  
42 health care overall and in the EMS setting, it is crucial that health care workers support  
43 patient involvement in care decisions and provide relevant information to the patients. By  
44 the seeing the patient as a team member[19,25], the EMS personnel can create a  
45 psychologically safe environment for the patients. Patients then are more likely to talk about  
46  
47  
48  
49  
50  
51  
52  
53  
54  
55  
56  
57  
58  
59  
60

1  
2  
3 their concerns, to get an experience of interaction, and to feel safe in the EMS encounter.

4  
5 In previous research among other factors, the Finnish patient safety experts stated that trust  
6  
7 in the healthcare professionals and healthcare professionals' attitudes towards patient  
8  
9 participation in general are important, when involve patients to improve patient safety[26].

10  
11  
12 In this study, the perception of equality, the possibility to get information, and the  
13  
14 involvement in care decisions affected the patient's sense of safety in the EMS. A previous  
15  
16 study[28] showed that shared information and being treated in a friendly and respectful  
17  
18 manner are important when involving patients in patient safety. If the patient feels objectified  
19  
20 by the EMS personnel, this may cause a feeling of "suffering from care"[28], leading to a  
21  
22 sense of unsafety. Previous knowledge of patient experiences of safety in hospital  
23  
24 settings[18-20] highlights that being treated equally is important to patients, and based on  
25  
26 our findings this is also true in the context of EMS.  
27  
28  
29

30  
31 In our study, we did not classify the patients' negative experiences as AE, and conversely,  
32  
33 having a sense of safety in the EMS is not the same as actually receiving safe care. Despite  
34  
35 this, in other healthcare settings positive associations have been found between the patient  
36  
37 experiences and patient safety and clinical effectiveness [29]. However, based on patients'  
38  
39 experiences, valuable information emerged on how to improve patient safety and the patient  
40  
41 encounter in EMS. Some of the patients had experienced, especially with driving, a situation  
42  
43 that could have compromised the safety of the patient and the EMS personnel. The EMS  
44  
45 personnel's clinical judgment was important when patients described what makes them feel  
46  
47 safe when cared for by EMS personnel. Like a study conducted by Togher et al.[30], our  
48  
49 study emphasizes the importance of a short waiting time, patients' confidence in the EMS  
50  
51 personnel, and the personnel's professional skills and communication. Our study found that  
52  
53 these factors also influence patients' experiences of sense of safety. However, in our study  
54  
55 a short waiting time according to patients ranged from a few to 30 minutes.  
56  
57  
58  
59  
60

1  
2  
3 In some respects, our findings are in line with the results described in former patient safety  
4 culture studies[6-9]. The generic category *Factors affecting patients' involvement in care*  
5 *decisions* reflects both the “social process” and the “psychological dimension[7] or  
6 teamwork, communication and patient-centred described in other studies[6,8-9]. On the  
7 other hand, generic category *Circumstantial factors affecting care* reflects the  
8 “organizational dimension”[7] or leadership and evidence-based described in the other  
9 studies[6,8-9]. However, our study also highlights the gap between what safety means to  
10 the EMS personnel or the EMS organization and how patients experience sense of safety  
11 in the EMS encounter. Like a study conducted in hospital setting suggests[31], error  
12 management should promote developing a strong safety culture that affords the patient a  
13 role in promoting safety in their care. However, EMS organizations and EMS personnel must  
14 continue to develop the other safety elements in the EMS.

15  
16  
17  
18  
19  
20  
21  
22  
23  
24  
25  
26  
27  
28  
29  
30  
31 Furthermore, based on this study and a former study[32], EMS personnel, EMS  
32 organizations, and vocational training providers need additional knowledge about factors  
33 affecting patients' sense of safety in the EMS. The EMS personnel require more education  
34 to improve their social skills and to be able to foster psychological safety for the patient. The  
35 curriculum in nurse training should thus be expanded to include development of social skills.  
36 Therefore, in the future it could be beneficial to explore the social factor between EMS  
37 personnel and the patients by using ethnographic framework within observational study.  
38  
39  
40  
41  
42  
43  
44  
45  
46  
47  
48

### 49 **Study strengths and limitations**

50  
51 It could be a strength or a limitation that the researchers had a deep pre-understanding of  
52 the research topic. Our deep theoretical and clinical experience helps us to understand  
53 patients' experiences of the EMS and also to put these into a clinical context despite the  
54 short interviews. However, theoretical and clinical experience could also cause a bias via a  
55  
56  
57  
58  
59  
60

1  
2  
3 lack of openness to the subject. To reduce this potential bias, we moved back and forward  
4  
5 between the interviews and the expressions and between the categories and the interviews  
6  
7 during the analysis. In addition, one of the researchers had no experience with EMS, but  
8  
9 had working knowledge of patient safety, and this reduced the risk of bias caused by  
10  
11 preconceptions.  
12  
13

14  
15 The patients were recruited from only one health care district area, which could reduce the  
16  
17 transferability of the results. However, patients' characteristics cover common EMS patient  
18  
19 groups according to the ERC official statistics and therefore it is reasonable to think that the  
20  
21 results can be transferred to similar context. According to the exclusion criteria, we did not  
22  
23 interview high priority patients suffering for multiple traumas or other life-threatening  
24  
25 conditions or inter-hospital transfers. These patients could have given valuable insight into  
26  
27 how they experience sense of safety when EMS personnel must use for example support  
28  
29 equipment and different kinds of transfer methods.  
30  
31  
32

33  
34 The interviews were performed when the patient was admitted to the ED. This may also be  
35  
36 considered a limitation or a strength: a limitation due to the patient's experiences of illness,  
37  
38 a strength due to their memory of the EMS personnel and the EMS encounter being fresh  
39  
40 and unaffected by other people's opinions. Because of the timing of the interviews, one  
41  
42 might assume that the care in the EMS was still in patients' recent memory. The short  
43  
44 duration of the interviews may be a limitation and may have been caused by the patient's  
45  
46 illness or fatigue.  
47  
48

49  
50 Even if the interviews were done alone with the patient, it is possible that the patients were  
51  
52 hesitant to openly share their views. There could have been barriers to the patients  
53  
54 disclosing their concerns caused by for instance "I do not want to be a troublemaker", "I  
55  
56 don't know how to raise my concern", or "I do not want to harm my relationship with members  
57  
58 of the medical team"[33]. To reduce these concerns, the interviewer introduced herself as a  
59  
60

1  
2  
3 researcher, wore casual attire, and informed the patient that interviews are analysed  
4  
5 anonymously. Moreover, we informed the patients that participating or withdrawing or  
6  
7 anything that they say will not influence their treatment in the hospital or EMS. Despite  
8  
9 certain limitations, this study offers valuable insights into patients' experience of sense of  
10  
11 safety in EMS.  
12  
13  
14  
15

## 16 **CONCLUSIONS**

17  
18 The EMS personnel's social interactions seem to be associated with patients' experience of  
19  
20 sense of safety. Thus, more attention should be directed to the EMS personnel's social skills  
21  
22 and their ability to create a psychologically safe environment for the patient. In addition, this  
23  
24 study adds knowledge about the factors contributing to or reducing patients' perception of  
25  
26 safety when attended to by EMS personnel. This information is valuable when EMS  
27  
28 organizations design methods to involve patients in developing EMS organizations' safety  
29  
30 performance.  
31  
32  
33  
34  
35

## 36 **ACKNOWLEDGEMENTS**

37  
38 We thank the EMS patients who shared their experiences with us. We also thank the  
39  
40 emergency department nurses for valuable help in recruiting patients.  
41  
42  
43

## 44 **CONFLICT OF INTEREST**

45  
46 All authors declare that they have no competing interests.  
47  
48  
49

## 50 **AUTHORS' CONTRIBUTIONS**

51  
52 All authors contributed to this study as follows: study design (AV, VL, MC), data collection  
53  
54 (AV), data analysis (AV, VL, ST), and writing the manuscript (AV, VL, MC, ST). All authors  
55  
56 read and approved the final manuscript.  
57  
58  
59  
60

## FUNDING

Funding was provided by Finnish State Research Funding.

## AVAILABILITY OF DATA AND MATERIAL

The data used and analysed during the study are available from the corresponding author on reasonable request.

## CONCENT FOR PUBLICATION

Not applicable.

## REFERENCES

1. Institute of Medicine (US) Committee on Quality of Health Care in America; Kohn LT, Corrigan JM, Donaldson MS, eds. *To Err is Human: Building a Safer Health System*. Washington (DC): National Academies Press (US); 2000. doi:10.17226/9728.
2. World Health Organization. Exploring patient participation in reducing health-care related safety risks. World Health Organization, Copenhagen. 2013. Available from: [http://www.euro.who.int/\\_\\_data/assets/pdf\\_file/0010/185779/e96814.pdf](http://www.euro.who.int/__data/assets/pdf_file/0010/185779/e96814.pdf) Accessed: 15 November 2019.
3. World Health Organization. Patient engagement. Technical series on safer primary care. Geneva: WHO, 2016. Available from: <https://apps.who.int/iris/bitstream/handle/10665/252269/9789241511629-eng.pdf>. Accessed: 15 November 2019.
4. Vincent C, Burnett S, Carthey J. Safety measurement and monitoring in healthcare: A framework to guide clinical teams and healthcare organizations in maintaining safety. *BMJ Qual Saf* 2014;23:670-677. doi:10.1136/bmjqs-2013-002757.
5. World Health Organization (WHO) 2009. Conceptual Framework for the International Classification for Patient Safety, Version 1.1, Final Technical Report.

1  
2  
3 [https://apps.who.int/iris/bitstream/handle/10665/70882/WHO\\_IER\\_PSP\\_2010.2\\_eng.pdf?sequence=1](https://apps.who.int/iris/bitstream/handle/10665/70882/WHO_IER_PSP_2010.2_eng.pdf?sequence=1).

4  
5  
6  
7  
8 6. Sammer, C.E., Lykens, K., Singh, K.P., Mains, D.A. and Lackan, N.A. 2010. What is  
9 Patient Safety Culture? A Review of the Literature. *J Nurs Scholarsh*, 42: 156-165.  
10 doi:10.1111/j.1547-5069.2009.01330.x

11  
12  
13  
14 7. Reiman T, Pietikäinen E, Oedewald P. Multilayered approach to patient safety culture.  
15 *Qual Saf Health Care* 2010;19. doi:10.1136/qshc.2008.029793.

16  
17  
18  
19 8. Stavrianopoulos, T. 2012. The development of patient safety culture. *Health Sci J*, 6(2),  
20 201.

21  
22  
23  
24 9. Reis, C. T., Paiva, S. G., & Sousa, P. 2018. The patient safety culture: a systematic  
25 review by characteristics of hospital survey on patient safety culture dimensions. *Int J Qual*  
26 *Health Care*, 30(9), 660-677. doi: 10.1093/intqhc/mzy080

27  
28  
29  
30 10. Holgate R. The opinion of emergency medical service personnel regarding safety in  
31 pre-hospital emergency care practice. Johannesburg: University of the Witwatersrand,  
32 2015. Available from:  
33 <https://pdfs.semanticscholar.org/fbb6/a55bfbf33da065422982f16a79de87fd8a46.pdf>.  
34 Accessed: 15 November 2019.

35  
36  
37  
38  
39 11. Brice JH, Studnek JR, Bigham BL, et al. EMS provider and patient safety during  
40 response and transport: Proceedings of an ambulance safety conference. *Prehosp Emerg*  
41 *Care*. 2012;16:3-19. doi:10.3109/10903127.2011.626106.

42  
43  
44  
45 12. Weaver MD, Wang HE, Fairbanks RJ, Patterson D. The association between EMS  
46 workplace safety culture and safety outcomes. *Prehosp Emerg Care*. 2012;16(1):43-52.  
47 doi:10.3109/10903127.2011.614048

48  
49  
50  
51  
52 13. Salminen-Tuomaala M, Leikkola P, Paavilainen E. Patient and staff safety incidents  
53 and near misses in out-of-hospital emergency care. *Emergency Med* 2014;4:219.  
54 doi:10.4172/2165-7548.1000219.  
55  
56  
57  
58  
59  
60



- 1  
2  
3 14. Salminen-Tuomaala M, Leikkola P, Paavilainen E. Emergency health care  
4 professionals' experiences of factors that influence care quality and safety. *Clin Nurs Stud*.  
5 2015;3:60-68. doi:10.5430/cns.v3n3p60.  
6  
7
- 8  
9 15. Bigham BL, Buick JE, Brooks SC, Morrison M, Shojanian KG, Morrison LJ. Patient  
10 safety in emergency medical services: A systematic review of the literature. *Prehosp*  
11 *Emerg Care*. 2012;16:20-35 doi:10.3109/10903127.2011.621045.  
12  
13
- 14  
15 16. Coster JE, Irving AD, Turner JK, Phung VH, Siriwardena AN. Prioritizing novel and  
16 existing ambulance performance measures through expert and lay consensus: A three-  
17 stage multimethod consensus study. *Health Expect*. 2018;21:249–260.  
18 doi:10.1111/hex.12610.  
19  
20
- 21  
22 17. Fairbanks RJ, Crittenden CN, O'Gara KG, et al. Emergency medical services provider  
23 perceptions of the nature of adverse events and near-misses in out-of-hospital care: An  
24 ethnographic view. *Acad Emerg Med*. 2008;15:633-640. doi:10.1111/j.1553-  
25 2712.2008.00147.x.  
26  
27
- 28  
29 18. Rainey H, Ehrich K, Mackintosh N, Sandall J. The role of patients and their relatives in  
30 'speaking up' about their own safety - a qualitative study of acute illness. *Health Expect*.  
31 2015;18:392-405. doi: 10.1111/hex.12044.  
32  
33
- 34  
35 19. Sahlström M, Partanen P, Azimirad M, Selander T, Turunen H. Patient participation in  
36 patient safety—An exploration of promoting factors. *J Nurs Manag*. 2019;27:84-92. doi:  
37 10.1111/jonm.12651.  
38  
39
- 40  
41 20. McTier L, Botti M, Duke M. Patient participation in medication safety during an acute  
42 care admission. *Health Expect*. 2015;18:1744-1756. doi:10.1111/hex.12167.  
43  
44
- 45  
46 21. Health Care Act 1326:2010. Ministry of Social Affairs and Health, Finland. 2013.  
47  
48
- 49  
50 22. Ministry of Social Affairs and Health decree of prehospital emergency care 585:2017.  
51 Ministry of Social Affairs and Health, Finland. 2017.  
52  
53
- 54  
55 23. Patton MQ. *Qualitative research and evaluation methods: Integrating theory and*  
56 *practice*. Fourth edition ed. California, United States of America: SAGE Publications, Inc.;  
57 2015:52-53.  
58  
59  
60

- 1  
2  
3 24. Elo S, Kyngäs H. The qualitative content analysis process. *J Adv Nurs*. 2008;62:107-  
4 115. doi:10.1111/j.1365-2648.2007.04569.x.  
5  
6  
7  
8 25. Edmondson, A. "Psychological Safety, Trust and Learning: A Group-level Lens." In:  
9 Kramer R., Cook K. eds. *Trust and Distrust in Organizations: Dilemmas and Approaches*,  
10 239–272. New York: Russell Sage Foundation. 2004.  
11  
12  
13  
14 28. Sahlström M, Partanen P, Rathert C, Turunen H. Patient participation in patient safety  
15 still missing: Patient safety experts' views. *Int J Nurs Pract*. 2016;22(5):461-469.  
16 doi:10.1111/ijn.12476.  
17  
18  
19  
20 29. Bishop AC, Macdonald M. Patient involvement in patient safety: A qualitative study of  
21 nursing staff and patient perceptions. *J Patient Saf*. 2017;13:82-87.  
22 doi:10.1097/PTS.000000000000123.  
23  
24  
25  
26 30. Ahlenius M, Lindström V, Vicente V. Patients' experience of being badly treated in the  
27 ambulance service: A qualitative study of deviation reports in Sweden. *Int Emerg Nurs*.  
28 2017;30:25-30 doi:10.1016/j.ienj.2016.07.004.  
29  
30  
31  
32  
33 31. Doyle C, Lennox L, Bell D. A systematic review of evidence on the links between  
34 patient experience and clinical safety and effectiveness. *BMJ*  
35 *Open* 2013;3:e001570. doi:10.1136/bmjopen-2012-001570  
36  
37  
38  
39 30. Togher FJ, O'Cathain A, Phung V-, Turner J, Siriwardena AN. Reassurance as a key  
40 outcome valued by emergency ambulance service users: A qualitative interview study.  
41 *Health Expect*. 2015;18:2951-2961. doi:10.1111/hex.12279.  
42  
43  
44  
45 31. Sahlström M, Partanen P, Turunen H. Safety as experienced by patients themselves: a  
46 Finnish survey of the most recent period of care. *Res Nurs Health*. 2014;37(3):194-203.  
47 doi:10.1002/nur.21589  
48  
49  
50  
51  
52 32. Sjölin H, Lindström V, Hult H, Ringsted C, Kurland L. What an ambulance nurse needs  
53 to know: A content analysis of curricula in the specialist nursing programme in prehospital  
54 emergency care. *Int Emerg Nurs*. 2015;23:127-132. doi:10.1016/j.ienj.2014.09.002.  
55  
56  
57  
58  
59  
60

1  
2  
3 33. Bell SK, Roche SD, Mueller A, et al. Speaking up about care concerns in the ICU:  
4 Patient and family experiences, attitudes and perceived barriers. *BMJ Qual Saf*.  
5 2018;27:928-936. doi:10.1136/bmjqs-2017-007525.  
6  
7  
8  
9  
10  
11  
12  
13  
14  
15  
16  
17  
18  
19  
20  
21  
22  
23  
24  
25  
26  
27  
28  
29  
30  
31  
32  
33  
34  
35  
36  
37  
38  
39  
40  
41  
42  
43  
44  
45  
46  
47  
48  
49  
50  
51  
52  
53  
54  
55  
56  
57  
58  
59  
60

For peer review only

1  
2  
3  
4  
5  
6  
7  
8  
9  
10  
11  
12  
13  
14  
15  
16  
17  
18  
19  
20  
21  
22  
23  
24  
25  
26  
27  
28  
29  
30  
31  
32  
33  
34  
35  
36  
37  
38  
39  
40  
41  
42  
43  
44  
45  
46  
47  
48  
49  
50  
51  
52  
53  
54  
55  
56  
57  
58  
59  
60

I, the Submitting Author has the right to grant and does grant on behalf of all authors of the Work (as defined in the below author licence), an exclusive licence and/or a non-exclusive licence for contributions from authors who are: i) UK Crown employees; ii) where BMJ has agreed a CC-BY licence shall apply, and/or iii) in accordance with the terms applicable for US Federal Government officers or employees acting as part of their official duties; on a worldwide, perpetual, irrevocable, royalty-free basis to BMJ Publishing Group Ltd ("BMJ") its licensees and where the relevant Journal is co-owned by BMJ to the co-owners of the Journal, to publish the Work in BMJ Open and any other BMJ products and to exploit all rights, as set out in our [licence](#).

The Submitting Author accepts and understands that any supply made under these terms is made by BMJ to the Submitting Author unless you are acting as an employee on behalf of your employer or a postgraduate student of an affiliated institution which is paying any applicable article publishing charge ("APC") for Open Access articles. Where the Submitting Author wishes to make the Work available on an Open Access basis (and intends to pay the relevant APC), the terms of reuse of such Open Access shall be governed by a Creative Commons licence – details of these licences and which [Creative Commons](#) licence will apply to this Work are set out in our licence referred to above.

peer review only

1  
2  
3  
4  
5  
6  
7  
8  
9  
10  
11  
12  
13  
14  
15  
16  
17  
18  
19  
20  
21  
22  
23  
24  
25  
26  
27  
28  
29  
30  
31  
32  
33  
34  
35  
36  
37  
38  
39  
40  
41  
42  
43  
44  
45  
46  
47  
48  
49  
50  
51  
52  
53  
54  
55  
56  
57  
58  
59  
60

For peer review only

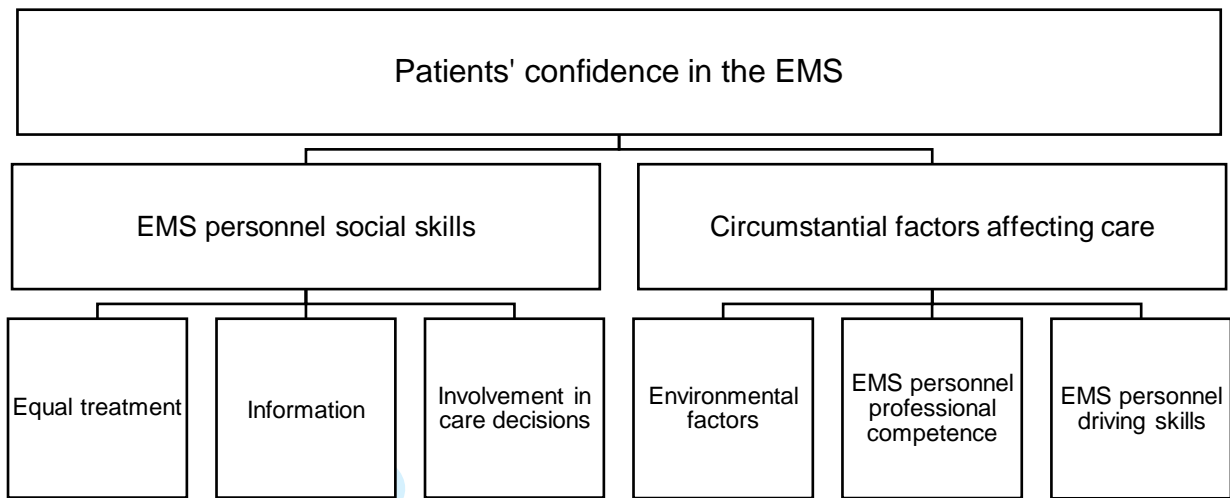

Figure 1. Patients' experiences of sense of their safety in the EMS.

1  
2  
3 Supplementary file 1: Interview guide  
4  
5

- 6 1. Can you tell me about your experience of the EMS encounter?  
7 - Additional questions:  
8 ○ Can you tell me more about the waiting time?  
9 ○ Can you tell me more about the assessment?  
10 ○ Can you tell me more about the treatment?  
11 ○ Can you tell me more about the transportation?  
12 ○ Can you tell me more about the handover at the ED?  
13  
14  
15 2. What made you feel safe during the EMS encounter?  
16 - Follow up question if needed:  
17 ○ Can you tell me more about that?  
18  
19 3. Was there anything that made you feel insecure during the EMS encounter?  
20 - Follow up question if needed:  
21 ○ Can you tell me more about that?  
22  
23 4. Is there something else you want to tell me about the care in the EMS?  
24  
25  
26  
27  
28  
29  
30  
31  
32  
33  
34  
35  
36  
37  
38  
39  
40  
41  
42  
43  
44  
45  
46  
47  
48  
49  
50  
51  
52  
53  
54  
55  
56  
57  
58  
59  
60

## Supplementary file 2: Example of the coding tree

| Patients' descriptions                                                                                                                                                                                                                                                                                                                          | Subcategories                                                                                                     |                                                         |                                                                                    |                       |                                       |                              |
|-------------------------------------------------------------------------------------------------------------------------------------------------------------------------------------------------------------------------------------------------------------------------------------------------------------------------------------------------|-------------------------------------------------------------------------------------------------------------------|---------------------------------------------------------|------------------------------------------------------------------------------------|-----------------------|---------------------------------------|------------------------------|
|                                                                                                                                                                                                                                                                                                                                                 | Equal treatment                                                                                                   | Information                                             | Involvement in care decisions                                                      | Environmental factors | EMS personnel professional competence | EMS personnel driving skills |
| <p><i>They weren't sort of formal. So, they were like a human next to a human. So, I feel that this is a very important thing at least for me personally. So, like if they look like officials/formal and just very formally ask these questions it is different than if they are not as formal. It creates a sort of pleasant feeling.</i></p> | <p>Don't feel nice if acting is too official</p> <p>Natural acting (not too official) makes relationship nice</p> |                                                         |                                                                                    |                       |                                       |                              |
| <p><i>Well then, the ambulance staff interviewed me and they took all sorts of test and I don't know what they took but I think we were there for an hour and then they said that we should get to the hospital because it won't go away otherwise. So, then we came here and now I am here.</i></p>                                            |                                                                                                                   | <p>Lack of information about assessment and results</p> |                                                                                    |                       |                                       |                              |
| <p><i>And nothing else other than lie down inside the ambulance and cannula was inserted into my hand and I have type 1 diabetes so they took my blood sugar levels, there was nothing alarming in those readings and they asked if I want to have pain medications and I said I don't need any and every five minutes</i></p>                  |                                                                                                                   |                                                         | <p>Ask patient need for pain medication</p> <p>Ask patient feelings during the</p> |                       |                                       |                              |



|                                                                                                                                                                                                                                                                                                                                                                                                                                                                                                                                                                                                                                                                                                                                                                                                                    |  |  |                  |                                            |                                                                                                                                                                                       |                        |
|--------------------------------------------------------------------------------------------------------------------------------------------------------------------------------------------------------------------------------------------------------------------------------------------------------------------------------------------------------------------------------------------------------------------------------------------------------------------------------------------------------------------------------------------------------------------------------------------------------------------------------------------------------------------------------------------------------------------------------------------------------------------------------------------------------------------|--|--|------------------|--------------------------------------------|---------------------------------------------------------------------------------------------------------------------------------------------------------------------------------------|------------------------|
| <p>1<br/>2<br/>3<br/>4<br/>5<br/>6<br/>7<br/>8<br/>9<br/>10</p> <p><i>they asked if I was feeling ok. One of the paramedic's was chatting to me and taking down information and then we arrived at the hospital and we came into this treatment room and I could not imagine any better treatment or transportation or anything.</i></p>                                                                                                                                                                                                                                                                                                                                                                                                                                                                           |  |  | <p>transport</p> |                                            |                                                                                                                                                                                       |                        |
| <p>11<br/>12<br/>13<br/>14<br/>15<br/>16</p> <p><i>Well I did not hold on to anything, so I was just able to be sort of relaxed. But it did shake and bounce, so the road is worse there, but we got there regardless.</i></p>                                                                                                                                                                                                                                                                                                                                                                                                                                                                                                                                                                                     |  |  |                  | <p>Shaky and bouncy ride<br/>Bad roads</p> |                                                                                                                                                                                       |                        |
| <p>17<br/>18<br/>19<br/>20<br/>21<br/>22<br/>23<br/>24<br/>25<br/>26<br/>27<br/>28<br/>29<br/>30<br/>31<br/>32<br/>33<br/>34<br/>35<br/>36<br/>37<br/>38</p> <p><i>Well... They did investigations, like for example this morning. So, then they said that they don't understand so they will bring me here. Probably it was somewhat tricky what this illness may be, I don't know. Because it was only two weeks ago when I was here. The transportations were similar. And then when we left home they apparently stopped because I felt that it can't be this smooth on the road. They tried to insert, and it failed so it was not inserted (shows cannula). They can insert it soon at the hospital, apparently the veins are so fragile. That's why it failed. Yeah, I don't know what else to say.</i></p> |  |  |                  |                                            | <p>Lack of knowledge (EMS personnel)<br/>Solution is to transport to the hospital<br/>Uncertainty to put an IV (paramedics try first and then decide to leave it to the hospital)</p> |                        |
| <p>39<br/>40<br/>41<br/>42</p> <p><i>It was good because I was tied securely so I did not sway, and the ambulance</i></p>                                                                                                                                                                                                                                                                                                                                                                                                                                                                                                                                                                                                                                                                                          |  |  |                  |                                            |                                                                                                                                                                                       | <p>Not driving too</p> |

1  
2  
3  
4  
5  
6  
7  
8  
9  
10  
11  
12  
13  
14  
15  
16  
17  
18  
19  
20  
21  
22  
23  
24  
25  
26  
27  
28  
29  
30  
31  
32  
33  
34  
35  
36  
37  
38  
39  
40  
41  
42  
43  
44  
45  
46

1  
2  
3  
4  
5  
6  
7  
8  
9  
10  
11  
12  
13  
14  
15  
16  
17  
18  
19  
20  
21  
22  
23  
24  
25  
26  
27  
28  
29  
30  
31  
32  
33  
34  
35  
36  
37  
38  
39  
40  
41  
42  
43  
44  
45  
46

|                                                                                                                                         |  |  |  |  |  |                                                             |
|-----------------------------------------------------------------------------------------------------------------------------------------|--|--|--|--|--|-------------------------------------------------------------|
| <i>driver did not drive recklessly and then I knew it was safe to be aboard on the way to get treatment. And to be in expert hands.</i> |  |  |  |  |  | fast<br><br>Sens of safety when get transported to hospital |
|-----------------------------------------------------------------------------------------------------------------------------------------|--|--|--|--|--|-------------------------------------------------------------|

For peer review only

1  
2  
3  
4  
5  
6  
7  
8  
9  
10  
11  
12  
13  
14  
15  
16  
17  
18  
19  
20  
21  
22  
23  
24  
25  
26  
27  
28  
29  
30  
31  
32  
33  
34  
35  
36  
37  
38  
39  
40  
41  
42  
43  
44  
45  
46

For peer review only

## COREQ (CONsolidated criteria for REporting Qualitative research) Checklist

A checklist of items that should be included in reports of qualitative research. You must report the page number in your manuscript where you consider each of the items listed in this checklist. If you have not included this information, either revise your manuscript accordingly before submitting or note N/A.

| Topic                                          | Item No. | Guide Questions/Description                                                                                                                              | Reported on Page No. |
|------------------------------------------------|----------|----------------------------------------------------------------------------------------------------------------------------------------------------------|----------------------|
| <b>Domain 1: Research team and reflexivity</b> |          |                                                                                                                                                          |                      |
| <i>Personal characteristics</i>                |          |                                                                                                                                                          |                      |
| Interviewer/facilitator                        | 1        | Which author/s conducted the interview or focus group?                                                                                                   |                      |
| Credentials                                    | 2        | What were the researcher's credentials? E.g. PhD, MD                                                                                                     |                      |
| Occupation                                     | 3        | What was their occupation at the time of the study?                                                                                                      |                      |
| Gender                                         | 4        | Was the researcher male or female?                                                                                                                       |                      |
| Experience and training                        | 5        | What experience or training did the researcher have?                                                                                                     |                      |
| <i>Relationship with participants</i>          |          |                                                                                                                                                          |                      |
| Relationship established                       | 6        | Was a relationship established prior to study commencement?                                                                                              |                      |
| Participant knowledge of the interviewer       | 7        | What did the participants know about the researcher? e.g. personal goals, reasons for doing the research                                                 |                      |
| Interviewer characteristics                    | 8        | What characteristics were reported about the interviewer/facilitator? e.g. Bias, assumptions, reasons and interests in the research topic                |                      |
| <b>Domain 2: Study design</b>                  |          |                                                                                                                                                          |                      |
| <i>Theoretical framework</i>                   |          |                                                                                                                                                          |                      |
| Methodological orientation and Theory          | 9        | What methodological orientation was stated to underpin the study? e.g. grounded theory, discourse analysis, ethnography, phenomenology, content analysis |                      |
| <i>Participant selection</i>                   |          |                                                                                                                                                          |                      |
| Sampling                                       | 10       | How were participants selected? e.g. purposive, convenience, consecutive, snowball                                                                       |                      |
| Method of approach                             | 11       | How were participants approached? e.g. face-to-face, telephone, mail, email                                                                              |                      |
| Sample size                                    | 12       | How many participants were in the study?                                                                                                                 |                      |
| Non-participation                              | 13       | How many people refused to participate or dropped out? Reasons?                                                                                          |                      |
| <i>Setting</i>                                 |          |                                                                                                                                                          |                      |
| Setting of data collection                     | 14       | Where was the data collected? e.g. home, clinic, workplace                                                                                               |                      |
| Presence of non-participants                   | 15       | Was anyone else present besides the participants and researchers?                                                                                        |                      |
| Description of sample                          | 16       | What are the important characteristics of the sample? e.g. demographic data, date                                                                        |                      |
| <i>Data collection</i>                         |          |                                                                                                                                                          |                      |
| Interview guide                                | 17       | Were questions, prompts, guides provided by the authors? Was it pilot tested?                                                                            |                      |
| Repeat interviews                              | 18       | Were repeat interviews carried out? If yes, how many?                                                                                                    |                      |
| Audio/visual recording                         | 19       | Did the research use audio or visual recording to collect the data?                                                                                      |                      |
| Field notes                                    | 20       | Were field notes made during and/or after the interview or focus group?                                                                                  |                      |
| Duration                                       | 21       | What was the duration of the interviews or focus group?                                                                                                  |                      |
| Data saturation                                | 22       | Was data saturation discussed?                                                                                                                           |                      |
| Transcripts returned                           | 23       | Were transcripts returned to participants for comment and/or                                                                                             |                      |

| Topic                                  | Item No. | Guide Questions/Description                                                                                                        | Reported on Page No. |
|----------------------------------------|----------|------------------------------------------------------------------------------------------------------------------------------------|----------------------|
|                                        |          | correction?                                                                                                                        |                      |
| <b>Domain 3: analysis and findings</b> |          |                                                                                                                                    |                      |
| <i>Data analysis</i>                   |          |                                                                                                                                    |                      |
| Number of data coders                  | 24       | How many data coders coded the data?                                                                                               |                      |
| Description of the coding tree         | 25       | Did authors provide a description of the coding tree?                                                                              |                      |
| Derivation of themes                   | 26       | Were themes identified in advance or derived from the data?                                                                        |                      |
| Software                               | 27       | What software, if applicable, was used to manage the data?                                                                         |                      |
| Participant checking                   | 28       | Did participants provide feedback on the findings?                                                                                 |                      |
| <i>Reporting</i>                       |          |                                                                                                                                    |                      |
| Quotations presented                   | 29       | Were participant quotations presented to illustrate the themes/findings?<br>Was each quotation identified? e.g. participant number |                      |
| Data and findings consistent           | 30       | Was there consistency between the data presented and the findings?                                                                 |                      |
| Clarity of major themes                | 31       | Were major themes clearly presented in the findings?                                                                               |                      |
| Clarity of minor themes                | 32       | Is there a description of diverse cases or discussion of minor themes?                                                             |                      |

Developed from: Tong A, Sainsbury P, Craig J. Consolidated criteria for reporting qualitative research (COREQ): a 32-item checklist for interviews and focus groups. *International Journal for Quality in Health Care*. 2007. Volume 19, Number 6: pp. 349 – 357

**Once you have completed this checklist, please save a copy and upload it as part of your submission. DO NOT include this checklist as part of the main manuscript document. It must be uploaded as a separate file.**

# BMJ Open

## PATIENTS' PERCEPTIONS OF SAFETY IN EMERGENCY MEDICAL SERVICES – AN INTERVIEW STUDY

|                                 |                                                                                                                                                                                                                                                                                                                                                                                                                                                                                                                                                                                                                                                                    |
|---------------------------------|--------------------------------------------------------------------------------------------------------------------------------------------------------------------------------------------------------------------------------------------------------------------------------------------------------------------------------------------------------------------------------------------------------------------------------------------------------------------------------------------------------------------------------------------------------------------------------------------------------------------------------------------------------------------|
| Journal:                        | <i>BMJ Open</i>                                                                                                                                                                                                                                                                                                                                                                                                                                                                                                                                                                                                                                                    |
| Manuscript ID                   | bmjopen-2020-037488.R2                                                                                                                                                                                                                                                                                                                                                                                                                                                                                                                                                                                                                                             |
| Article Type:                   | Original research                                                                                                                                                                                                                                                                                                                                                                                                                                                                                                                                                                                                                                                  |
| Date Submitted by the Author:   | 02-Aug-2020                                                                                                                                                                                                                                                                                                                                                                                                                                                                                                                                                                                                                                                        |
| Complete List of Authors:       | Venesoja, Anu; South Karelia Social and Health Care District, Acute care unit; Department of Emergency Medicine and Services, Helsinki University Hospital, Helsinki University, Department of Emergency Medicine and Services<br>Castrén, Maaret; Department of Emergency Medicine and Services, Helsinki University Hospital, Helsinki University, Department of Emergency Medicine and Services<br>Tella, Susanna; LAB University of Applied Sciences; University of Eastern Finland Faculty of Health Sciences<br>Lindström, Veronica ; Karolinska Institutet, Department of Neurobiology, Care Sciences and Society, section of Nursing); Samariten Ambulance |
| <b>Primary Subject Heading</b>: | Nursing                                                                                                                                                                                                                                                                                                                                                                                                                                                                                                                                                                                                                                                            |
| Secondary Subject Heading:      | Emergency medicine, Qualitative research                                                                                                                                                                                                                                                                                                                                                                                                                                                                                                                                                                                                                           |
| Keywords:                       | ACCIDENT & EMERGENCY MEDICINE, QUALITATIVE RESEARCH, Health & safety < HEALTH SERVICES ADMINISTRATION & MANAGEMENT                                                                                                                                                                                                                                                                                                                                                                                                                                                                                                                                                 |
|                                 |                                                                                                                                                                                                                                                                                                                                                                                                                                                                                                                                                                                                                                                                    |

SCHOLARONE™  
Manuscripts

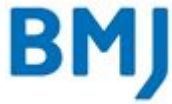

I, the Submitting Author has the right to grant and does grant on behalf of all authors of the Work (as defined in the below author licence), an exclusive licence and/or a non-exclusive licence for contributions from authors who are: i) UK Crown employees; ii) where BMJ has agreed a CC-BY licence shall apply, and/or iii) in accordance with the terms applicable for US Federal Government officers or employees acting as part of their official duties; on a worldwide, perpetual, irrevocable, royalty-free basis to BMJ Publishing Group Ltd ("BMJ") its licensees and where the relevant Journal is co-owned by BMJ to the co-owners of the Journal, to publish the Work in this journal and any other BMJ products and to exploit all rights, as set out in our [licence](#).

The Submitting Author accepts and understands that any supply made under these terms is made by BMJ to the Submitting Author unless you are acting as an employee on behalf of your employer or a postgraduate student of an affiliated institution which is paying any applicable article publishing charge ("APC") for Open Access articles. Where the Submitting Author wishes to make the Work available on an Open Access basis (and intends to pay the relevant APC), the terms of reuse of such Open Access shall be governed by a Creative Commons licence – details of these licences and which [Creative Commons](#) licence will apply to this Work are set out in our licence referred to above.

Other than as permitted in any relevant BMJ Author's Self Archiving Policies, I confirm this Work has not been accepted for publication elsewhere, is not being considered for publication elsewhere and does not duplicate material already published. I confirm all authors consent to publication of this Work and authorise the granting of this licence.

1  
2  
3  
4  
5 **PATIENTS' PERCEPTIONS OF SAFETY IN EMERGENCY MEDICAL SERVICES – AN**  
6  
7 **INTERVIEW STUDY**  
8  
9

10 Anu Venesoja, RN, MHSc, PhD-student <sup>1,2</sup>; Maaret Castrén, MD, PhD <sup>2</sup>; Susanna Tella, RN, PhD  
11  
12 <sup>3,4</sup>; Veronica Lindström, RN, PhD <sup>5,6</sup>  
13  
14

15  
16 <sup>1</sup> South Carelia Social and Healthcare District, Finland; <sup>2</sup> Department of Emergency Medicine and  
17 Services, Helsinki University Hospital, Helsinki University, Helsinki, Finland; <sup>3</sup> LAB University of  
18 Applied Sciences, Finland; <sup>4</sup> University of Eastern Finland; <sup>5</sup> Samariten Ambulance, Stockholm,  
19 Sweden; <sup>6</sup> Karolinska Institutet, Department of Neurobiology, Care Sciences, and Society Division  
20 of Nursing Stockholm, Sweden.  
21  
22  
23  
24  
25

26 **Short running title:** EMS patients' experiences of safety  
27  
28  
29

30 **Corresponding author:**  
31

32 Anu Venesoja  
33

34 Address: Timonkatu 29, FI-55100 Imatra, Finland  
35

36 E-mail: [anu.venesoja@helsinki.fi](mailto:anu.venesoja@helsinki.fi)  
37

38 Telephone: +358-405575824  
39

40 Word count: 4443  
41  
42  
43  
44  
45  
46  
47  
48  
49  
50  
51  
52  
53  
54  
55  
56  
57  
58  
59  
60



# PATIENTS' PERCEPTIONS OF SAFETY IN EMERGENCY MEDICAL SERVICES

## – AN INTERVIEW STUDY

### ABSTRACT

**Background:** Research on patient safety in Emergency Medical Services (EMS) has mainly focused on the organization's and/or the EMS personnel's perspective. Little is known about how patients perceive safety in EMS. This study aims to describe the patients' experiences of their sense of safety in EMS.

**Methods:** A qualitative design with individual interviews of EMS patients (n=21) and an inductive qualitative content analysis were used.

**Results:** Patients' experiences of EMS personnel's ability or inability to show or use their medical, technical, and driving skills affected the patients' sense of safety. When they perceived a lack of professionalism and knowledge among EMS personnel, they felt unsafe. Patients highlighted equality in the encounter, the quality of the information given by EMS personnel, and the opportunity to participate in the care as important factors creating a sense of safety during the EMS encounter. Altogether, patients' perceptions of safety in EMS were connected to their confidence in the EMS personnel.

**Conclusions:** Overall, patients felt safe during their EMS encounter, but the EMS personnel's professional competence alone is not enough for them to feel safe. Lack of communication or professionalism may compromise their sense of safety. Further work is needed to explore how patients' perceptions of safety can be utilized in improving safety in EMS.

**Keywords:** Ambulance service; patient perception; qualitative study; safety; prehospital nurse

### Strengths and limitations of this study

- The strengths are that detailed, rich information about patients' own experiences in their own words was gained.
- This study provides knowledge about what patients consider important for feeling safe in the EMS.
- Interviews offered the opportunity to gain knowledge about safety in the EMS from the patients' perspective.
- A limitation is that the interviews were done in a small hospital district, which could limit the transferability of the results.

## BACKGROUND

"To err is human"[1], but it can at worst cause disastrous results for patients seeking care and for the organization caring for them. Therefore, systematic development and research are needed to ensure and improve patient safety and quality of care. Errors are described as being usually caused by faulty systems, processes, or conditions in the organization rather than by individual health care workers, and thus, all health care actors, including patients, should be involved in developing the safety culture in health care. Global recommendations and guidelines to improve patient safety include the patients as active team members whenever possible[1-3]. Patients' experiences of difficulties and harms can provide information about safety, which is not obvious to healthcare staff[4].

The World Health Organization (WHO) has defined the term safety culture as *the product of individual and group values, attitudes, perceptions, competencies, and patterns of behavior that determine the commitment to, and the style and proficiency of, an organization's health and safety management*. According to WHO, another definition for safety culture is *an integrated pattern of individual and organizational behavior, based upon shared beliefs and values, that continuously seeks to minimize patient harm which may result from the processes of care delivery*. [5] When researchers use the term "patient safety culture", they define sections of safety culture which have an impact on patient safety. [6-9] Considering this relationship between safety culture and patient safety culture, it is essential to recognize how relationship affects the patients' perceptions of safety. In this study, safety in emergency medical services (EMS) is explored from the patients' perspective. The EMS includes health care professionals who respond to emergency calls, assessing, treating, and transporting patients to health care providers such as the emergency department (ED).

### Safety and patient safety in emergency medical services

By nature, EMS can be considered a challenging and constantly changing environment compared with other emergency care settings such as hospitals. The hospital environment is especially built for patient care whereas the EMS personnel treat the patients in their homes, in public, inside the

1  
2  
3 ambulance or outdoors. Because the environment is not always predictable in EMS, it could  
4  
5 compromise the safety of both EMS personnel and patients. Transporting a patient to hospital by  
6  
7 ambulance could also be a hazardous situation. The risks of traffic accidents are known to increase  
8  
9 if driving with lights and sirens [10-11]. There is some evidence that safety culture and patient and  
10  
11 EMS provider safety outcomes are interrelated. EMS personnel who reported an error or adverse  
12  
13 event (AE) evaluate safety culture lower than those who did not report an error or AE. Furthermore,  
14  
15 EMS personnel who reported safety-compromising behavior evaluate safety culture lower than  
16  
17 those who did not.[12]  
18  
19

20  
21 Otherwise, patient safety studies within the EMS setting have mainly investigated AE, mishaps, near-  
22  
23 misses, occupational hazards, and patient safety or quality of care, and these previous studies have  
24  
25 mainly focused on the organization's or EMS personnel's perspective and ignored the patients' point  
26  
27 of view on safety[13-17]. Patient safety from their own viewpoint has mainly been investigated  
28  
29 in hospital settings, showing that they give valuable insights into improving or assessing patient  
30  
31 safety[18-20]. As the EMS personnel sometimes has to work in a challenging environment, including  
32  
33 risks of driving hazards, there is a need to investigate the patients' perceptions of safety in the EMS.  
34  
35 Therefore, the aim of this study was to describe the patients' perceptions of safety in the EMS.  
36  
37  
38  
39  
40  
41

## 42 **METHODS**

43  
44 A qualitative study design with individual interviews was used to explore patients' perceptions of  
45  
46 safety in the EMS.  
47  
48  
49

### 50 **Setting**

51  
52 This study was carried out in Finland, where the Hospital Districts are responsible for organizing the  
53  
54 EMS. The Finnish EMS consists of advanced-level ambulances and basic-level ambulances, and  
55  
56 every hospital district must have at least one EMS officer (operational supervisor of the shift,  
57  
58 participates in challenging tasks). The advanced-level ambulances are staffed with two prehospital  
59  
60

nurses or one prehospital nurse and another qualified person, e.g. nurse or other health care professional or rescue worker. The education level among advanced-level prehospital nurses is at least a registered nurse (3.5 years) with advanced life support education (one year alongside the work) or a prehospital nurse (4 years). Basic-level ambulances are manned by at least one emergency medical technician (EMT)[21,22]. The EMS officer should be an advanced-level prehospital nurse with operative leadership education (for example Masters' degree or one-year operational leadership education) and leadership experience. The highest educated EMS personnel is always responsible for patient care, but when the patient is assessed as low priority, a nurse, EMT, or other health care professional can attend to the them during transport.

The health care district this study was conducted in is eastern Finland and it covers approximately 132 000 inhabitants. There is one central hospital in the district and ambulance services cover an area 6872.10km<sup>2</sup>, including both rural and urban regions. Ambulance transports vary between 1 and over 100km. In 2017, there were about 22 100 EMS requests in the area according to official statistics. At present (in 2018), there are one EMS officer, 11 ambulances, all of them advanced level ambulances, and in addition there are two units with the assignments to treat and evaluate low priority patients at home. The units have the same equipment as the ambulance and point-of-care devices, but they are not capable of transporting the patient.

### **Data collection and participants**

Data collection was undertaken at the central hospital ED, where patients are transported by EMS. Data were collected via semi-structured interviews during a two-week period in March 2018. The interviews were conducted by the first author, a prehospital nurse with 20 years' working experience in the EMS, who has not had any professional or personal contact with the participants beforehand. Purposeful sampling [23] was used, aiming to achieve variation (gender, age, urban/rural area, primary condition) among participants without risking patient safety. The inclusion criteria were as follows: the patient was transported by the EMS to the ED after an

1  
2  
3 emergency call to the emergency response centre (ERC). The patient was assessed as low priority in  
4  
5 the ED or the patient was transported to the hospital as high priority, but the priority was assessed  
6  
7 as low after treatment in the ED. The patients needing urgent treatment in the ED, patients under the  
8  
9 influence of alcohol (based on ED nurses' assessment) or drugs and inter-hospital transports were  
10  
11 excluded. Additional exclusion criteria were being younger than 18 years of age, incapability of  
12  
13 communicating in Finnish, or presence of dementia, confusion, or terminal disease. ED nurses  
14  
15 identified eligible participants. The first author received a list of eligible participants from the ED  
16  
17 nurse, gave oral and written information about the study and asked about participation after patients  
18  
19 had received their initial assessment and treatment at the ED.  
20  
21  
22

23  
24 All interviews were performed on weekdays between 8 am to 4 pm, although some of the interviewed  
25  
26 patients had been transported to the ED in the night-time. The first, second, and last authors (the first  
27  
28 and last authors with working experience in EMS as prehospital nurses, and the second author with  
29  
30 experience as an EMS physician) together devised the interview questions. The interviews started  
31  
32 with an open-ended question: "*Can you tell me about your experience of the EMS encounter?*" To  
33  
34 encourage patients to share their experiences, additional questions were asked concerning waiting  
35  
36 time, assessment, treatment, transportation, and the handover at the ED. The interviews were  
37  
38 concluded by asking the patients to describe what made them feel safe or insecure during the EMS  
39  
40 encounter. The interview guide is presented in supplementary file 1. The authors held multiple  
41  
42 discussions during the data collection. The interviews lasted between 10 and 20 minutes. The  
43  
44 interviews continued until no new information was obtained during the interviews. The variations in  
45  
46 the interviews started to be limited during interview 15, but six more interviews were conducted  
47  
48 aiming to ensure that no new variations would emerge. All the interviews were recorded with a digital  
49  
50 recorder and transcribed verbatim by the first author. All the transcriptions were anonymised. Two  
51  
52 of the interviews were translated from Finnish into English to achieve transparency among all authors  
53  
54 participating in the study.  
55  
56  
57  
58  
59  
60

## **Patient and public involvement**

The patients or the public were not involved in the design and conduct of this study.

## **Data analysis**

An inductive qualitative content analysis was used to analyse the data[24]. The analysis began after all interviews had been listened to and transcribed. The text was then read several times to obtain a sense of the whole and to identify the patients' expressions about their perceptions of safety in the EMS. The expressions were single words or short sentences. The third author, who had no experience in EMS, but had working knowledge of patient safety research, read the transcripts with the aim of increasing the reliability of the process and verifying the first phase of open coding, in which similar expressions received the same open code. The coding was made without using any software for analysis. An example of the coding tree is presented in supplementary file 2.

After the open coding, the codes were collected into a sheet with other related codes. These coding sheets were then abstracted into sub-categories, which were grouped into generic categories and finally into the main category. During the analysis, there was a recurrent movement between the whole and the parts. The authors held multiple discussions to ensure the reliability and credibility of the analysis, keeping the balance between their pre-understanding and openness to the content during the analysis. In every phase, the analysis continued until consensus between the researchers was reached. The last phase in the analysis was the conceptualization of the results, displayed in Figure 1.

## **Ethical considerations**

This study was approved by the Ethics Committee of Helsinki University Hospital (HUS/3529/2017).

The patients received written information about the purpose of the study with contact information for the responsible researcher, and they had the possibility to ask the first author questions about the research. The patients filled out a form affirming their voluntary participation in the study. The

patients were informed that they have the right to withdraw from the study at any phase. During the interviews, the first author observed the patients and discontinued the discussion if any changes occurred in the patient's physical or mental condition.

## RESULTS

In total, 22 patients were asked to participate, 21 of whom agreed to participate in the study. One male refused the interview without providing a reason. Some of the patients had used EMS more than once and for some of them, this was a first contact to the EMS. The main reason for seeking EMS care was cardiac-related symptoms or breathing difficulties, as displayed in Table 1. Two of the patients did not describe their health problem or the reason for requesting an ambulance.

Table 1. Description of patients.

|                                                | Female n=12  | Male n=9     |
|------------------------------------------------|--------------|--------------|
| Age range (mean)                               | 44–91 (74.5) | 41–86 (68.1) |
| Transported from urban area                    | 7            | 5            |
| Transported from rural area                    | 5            | 4            |
| <i>Primary condition as patients described</i> |              |              |
| Breathing difficulties                         | 4            | 1            |
| Cardiac-related symptoms                       | 3            | 2            |
| Gastrointestinal problems                      | 2            | 1            |
| Lower body pain                                | 1            | 1            |
| Minor injury                                   | -            | 2            |
| Neurological symptoms                          | -            | 2            |
| Missing data                                   | 2            | -            |

The main category *Patients' confidence in the EMS* shows that the patients feel safe in the EMS and have confidence in EMS personnel. The patients' confidence in the EMS personnel were divided in two generic categories: *EMS personnel's social skills* and *circumstantial factors affecting patients' care*. EMS personnel's social skills and professional competence consist of subcategories *equal*



1  
2  
3 *treatment, information, involvement in care decisions and EMS personnel's professional competence.*  
4  
5 Circumstantial factors affecting patients' care is composed of subcategories *environmental factors*  
6  
7 and *EMS personnel's driving skills*. (Figure 1). The generic categories with their sub-categories are  
8  
9 presented below with illustrative quotations.  
10  
11  
12  
13

### 14 **EMS personnel social's skills and professional competence**

15  
16 The EMS personnel's social skills and professional competence that affected patients' sense of safety  
17  
18 in EMS included being treated equally, receiving information, being involved in their care, and  
19  
20 getting professional treatment.  
21  
22

#### 23 24 25 **Equal treatment**

26  
27 According to the patients, equal treatment and a reliable patient-EMS personnel relationship  
28  
29 generated a sense of safety in the EMS. The patients noted that it is essential that the EMS personnel's  
30  
31 behaviour is calm, natural, and friendly. They expressed that a bit of humour and small talk during  
32  
33 the care lighten the atmosphere and help to create a good patient-EMS personnel relationship.  
34  
35

36 *"They didn't feel like officials. They were like human to human." (Pt5)*

37  
38 On the other hand, patients said that they felt insecure or that the EMS personnel acted in a  
39  
40 condescending way when the personnel's behaviour was rushed, negative or too official, or when  
41  
42 the personnel lacked communication skills. The patients also stated that the EMS personnel did not  
43  
44 always take their concerns seriously and sometimes ignored them altogether. This was reflected in  
45  
46 how patients described situations where their mental and/or physical condition created a feeling of  
47  
48 insecurity, e.g. if they had difficulties with breathing, felt lonely, or had to wait for the ambulance for  
49  
50 a long time. Feeling insecure because of condescending treatment caused a sense of being unsafe  
51  
52 among the patients.  
53  
54

55  
56  
57 *"Waiting is the worst, especially if you are alone and there isn't anyone with you." (Pt6)*  
58  
59  
60

## Information

Most patients mentioned that the EMS personnel handed over enough information about the assessments, a student presence, environmental conditions, treatment, and medication as well as about driving with lights and sirens on. In addition, if the EMS personnel had contacted the hospital beforehand, the patients expressed that the information had transferred to the hospital personnel. The patients described that in these situations their treatment in the hospital started smoothly and quickly. However, some patients mentioned not getting enough information. Usually, the lack of information concerned what the EMS personnel has assessed, the assessments results or the patient's medication during care. Even these patients maintained confidence in the EMS personnel and their professionalism because of the feeling that they received help from EMS personnel. Lack of information thus had negligible impact on patients' feelings of safety in the EMS.

*"Ambulance personnel interviewed me and they took all sorts of assessments and I don't know all the assessments they took." (Pt13)*

## Involvement in care decisions

According to the patients, their involvement in care decisions varied. The patients' possibility to affect their transport position had an impact on their sense of safety. Especially the ones suffering from breathing problems stated that they wanted to sit on the seat rather than lay on the stretcher even if they were placed in an upright position. However, EMS personnel usually ignored this wish without explaining why it was not possible. Although some of the patients said that they did not have the chance to influence how they were moved to the ambulance or what position or where to stay during the transport, they did not automatically consider it negative.

*"They didn't let me walk anymore, they were pushing (with the stretchers) the old granny ... it sort of gives a nice feeling that somebody is still taking care of the old granny." (Pt5)*

1  
2  
3 In some situations regarding safety, the patients took an active role. For example, they asked the EMS  
4 personnel to put safety belts on or they asked to reduce ambulance speed if they felt that the speed  
5 compromised their safety.  
6  
7  
8

9  
10 *“I said that at least put the seatbelt on me. If you drive off the road, I fly out of here (from*  
11 *the stretchers) because I don't have the seatbelt on.” (Pt10)*  
12  
13  
14

### 15 16 EMS personnel's professional competence

17  
18 Patients stated that EMS personnel's professional competence made them feel safe during care.  
19  
20 According to them, good professional competence means asking questions related to their health  
21 problems, background information about previous illnesses, medication, home situation, etc., and  
22 taking assessments and giving medication when needed. These factors made them feel that the  
23 treatment had started immediately and that the EMS personnel were interested in their health problem.  
24  
25 Furthermore, the patients mentioned that when the EMS personnel supervised and gave guidance to  
26 the student it also had an effect on the patient's perception of the EMS personnel's professional  
27 competence. They noted that the EMS personnel mainly had good professional competence from  
28 their point of view.  
29  
30  
31  
32  
33  
34  
35  
36  
37  
38

39 *“The guys inserted an IV (intravenous cannula) and did assessments. Very professional*  
40 *personnel inserted the IV into my forearm, so they are very well educated.” (Pt11)*  
41  
42

43 *“They took care of me and measured my blood pressure and gave me the medication orally*  
44 *and that made me feel safe.” (Pt8)*  
45  
46  
47

48 However, some of the patients perceived that the EMS personnel lacked professional competence,  
49 and this affected their sense of safety. This situation occurred when the EMS personnel were uncertain  
50 of what had caused the patients' health problem or when the patient became aware that the EMS  
51 personnel had a lack of knowledge, e.g. when the only solution to the problem in the EMS personnel's  
52 view was to transport the patient to the hospital. In addition, when the personnel were unable to put  
53  
54  
55  
56  
57  
58  
59  
60

1  
2  
3 in an IV, the patients interpreted it as a lack of professional competence. These factors made the  
4  
5 patient feel uncertain and unsafe.  
6

7  
8 *“They said that they don’t understand, and they brought me here (hospital)... they tried to*  
9  
10 *insert an IV in my forearm and it failed.” (Pt3)*  
11  
12

### 13 14 **Circumstantial factors affecting care**

15  
16 Environmental factors (e.g. road and weather conditions, ambulance suspension, and conditions  
17  
18 inside the ambulance during the transport) and driving skills create the circumstances where the EMS  
19  
20 patients get treatment. These circumstantial factors were highlighted when the patients talked about  
21  
22 their perceptions of factors affecting the care and sense of safety in EMS.  
23  
24

### 25 26 27 **Environmental factors**

28  
29 Environmental factors markedly affect patients’ feelings of safety in EMS. They feel that EMS  
30  
31 provides an essential public safety function. Almost all of the patients interviewed had some  
32  
33 preconceived notions of how the EMS works, expectations based on their own perceptions or on how  
34  
35 the service has been described in the media. Quick response times increase their perceptions of safety.  
36  
37 However, the experience of a quick response time varied between the patients. They mentioned that  
38  
39 they felt safe while the ambulance transported them to hospital. They also described a feeling of relief  
40  
41 and security when the EMS personnel arrived and brought help to them with good equipment.  
42  
43

44  
45 *” Because I know that every time when I call an ambulance, help is near.” (Pt13)*  
46

47  
48 Some environmental issues reduced the patients’ feeling of safety or made them uncomfortable.  
49  
50 Uncomfortable and narrow stretchers and difficulties in getting inside the ambulance impair the  
51  
52 experience of the care. The experience of feeling bad increased if the temperature was too hot or too  
53  
54 cold during the transport. Bad, bumpy roads or poor suspension in the ambulance also made patients  
55  
56 feel worse.  
57  
58  
59  
60

1  
2  
3 *"Why did the ambulance have such bad and noisy suspension? Was the road so bad or was*  
4 *it the ambulance suspension?" (Pt10)*  
5  
6  
7  
8

### 9 EMS personnel's driving skills

10  
11 For the most part, the patients felt that the EMS personnel had good driving skills, reflected in  
12 "smooth and fast transportation" or not driving too fast. Furthermore, if the driver took notice of the  
13 weather and road conditions and adjusted the driving style accordingly, the patient had an impression  
14 of good driving skills and safe transportation. However, some of the patients felt unsafe and insecure  
15 if the ambulance's speed was too high, especially if the weather conditions were bad or the roads  
16 were slippery or uneven.  
17  
18  
19  
20  
21  
22  
23  
24

25 *"It was hailing, they were the size of ping pong balls, and other cars had stopped at the*  
26 *roadside but the ambulance was going very fast."* (Pt10)  
27  
28  
29  
30  
31

## 32 DISCUSSION

33  
34 Overall, the interviewed patients appeared to feel safe in the EMS and to have confidence in EMS  
35 personnel. Clearly, confidence in the care provider is the main factor affecting patients' sense of  
36 safety in the EMS. In addition, medical knowledge and driving skills are directly related to a  
37 positive sense of safety. However, the EMS personnel's professional competence and good driving  
38 skills are meaningless in maintaining the patients' confidence if the EMS personnel does not treat  
39 them in an equal and humane manner. Therefore, EMS personnel should become more aware of  
40 their social interactions and their importance to patients' perception of safety. In health care overall  
41 and in the EMS setting, it is crucial that health care workers support patient involvement in care  
42 decisions and provide relevant information to the patients. By seeing the patient as a team member  
43 and involving them in their care[19,25], the EMS personnel can create a psychologically safe  
44 environment for the patients. Patients then are more likely to talk about their concerns, to get an  
45 experience of interaction, and to feel safe in the EMS encounter. In previous research, the Finnish  
46  
47  
48  
49  
50  
51  
52  
53  
54  
55  
56  
57  
58  
59  
60

1  
2  
3 patient safety experts stated that trust in the healthcare professionals and their attitudes towards  
4 patient participation in general are important, when involving patients in improving patient  
5 safety[26].  
6  
7  
8  
9

10 In this study, the perception of equality, the possibility to get information, and the involvement in  
11 care decisions affected the patient's sense of safety in the EMS. A previous study[27] showed that  
12 shared information and being treated in a friendly and respectful manner are important according to  
13 patients. If they feel objectified by the EMS personnel, this may cause a feeling of "suffering from  
14 care"[28], leading to a sense of unsafety. Previous knowledge of patient experiences of safety in  
15 hospital settings[18-20] highlights that being treated equally is important to patients, and based on  
16 our findings this is also true in the context of EMS.  
17  
18  
19  
20  
21  
22  
23  
24  
25

26 In other healthcare settings, researchers establish positive associations between the patient  
27 experiences and patient safety and clinical effectiveness[29]. From the experiences, valuable  
28 information emerged on how to improve patient safety and the patient encounter in EMS. The EMS  
29 personnel's clinical judgment was important when patients described what makes them feel safe when  
30 cared for by EMS personnel. On the other hand, some of the patients had experienced, especially with  
31 driving, a situation that could have compromised the safety of the patient and the EMS personnel. A  
32 previous study reveals that EMS users value a short waiting time, confidence, professionalism and  
33 communication[30]. Our study points out that these same factors also influence their perceptions of  
34 their safety. However, in our study a short waiting time according to patients ranged from a few to  
35 30 minutes.  
36  
37  
38  
39  
40  
41  
42  
43  
44  
45  
46  
47  
48

49 In some respects, our findings are in line with the results described in former patient safety culture  
50 studies[6-9]. The categories *equal treatment*, *information* and *involvement in care decisions* reflect  
51 both the "social process" and the "psychological dimension"[7] or teamwork, communication and  
52 patient-centredness described in other studies[6,8-9]. On the other hand, the categories *EMS*  
53 *personnel's professional competence*, *environmental factors* and *EMS personnel's driving skills*  
54  
55  
56  
57  
58  
59  
60

1  
2  
3 reflect the “organizational dimension”[7] or leadership and evidence-based health care described in  
4 the other studies[6,8-9]. Like a study conducted in hospital setting suggests[31], error management  
5 should promote developing a strong safety culture that affords the patient a role in promoting safety  
6 in their care. Our study highlights the gap between what safety means to the EMS personnel or the  
7 EMS organization and what kind of perceptions patients had safety in the EMS encounter. Patient  
8 perception of safety in the EMS is not the same as actually receiving safe care. Therefore, EMS  
9 organizations and EMS personnel must continue to develop the other safety elements in the EMS.  
10 Furthermore, based on this study and a former study[32], EMS personnel, EMS organizations, and  
11 vocational training providers need additional knowledge about factors affecting patients’ sense of  
12 safety in the EMS. The EMS personnel require more education to improve their social skills and to  
13 be able to foster psychological safety for the patient. The curriculum in EMS personnel training  
14 should thus be expanded to include development of social skills. Therefore, in the future it could be  
15 beneficial to explore the social factor between EMS personnel and the patients by using ethnographic  
16 framework within observational study.

### 37 **Study strengths and limitations**

38  
39 It could be a strength or a limitation that the researchers had a deep pre-understanding of the research  
40 topic. Our deep theoretical and clinical experience helps us to understand patients' experiences of the  
41 EMS and also to put these into a clinical context despite the short interviews. However, theoretical  
42 and clinical experience could also cause a bias via a lack of openness to the subject. To reduce this  
43 potential bias, we moved back and forth between the interviews and the expressions and between the  
44 categories and the interviews during the analysis. In addition, one of the researchers had no experience  
45 with EMS, but had working knowledge of patient safety, and this reduced the risk of bias caused by  
46 preconceptions.

47  
48 The patients were recruited from only one health care district area, which could reduce the  
49 transferability of the results. However, patients’ characteristics cover common EMS patient groups  
50  
51  
52  
53  
54  
55  
56  
57  
58  
59  
60

1  
2  
3 according to the ERC official statistics and therefore it is reasonable to think that the results can be  
4 transferred to a similar context. According to the exclusion criteria, we did not interview high priority  
5 patients suffering for multiple traumas or other life-threatening conditions or inter-hospital transfers.  
6  
7 These patients could have given valuable information their perceptions of safety when EMS  
8 personnel must use for example support equipment and different kinds of transfer methods.  
9  
10  
11  
12

13  
14 The interviews were performed when the patient was admitted to the ED. This may also be considered  
15 a limitation or a strength: a limitation due to the patient's experiences of illness, a strength due to  
16 their memory of the EMS personnel and the EMS encounter being fresh and unaffected by other  
17 people's opinions. Because of the timing of the interviews, one might assume that the care in the  
18 EMS was still in the patients' recent memory. The short duration of the interviews may be a limitation  
19 and may have been caused by the patients' illness or fatigue. It is possible that the short duration  
20 would limit the depth of understanding.  
21  
22  
23  
24  
25  
26  
27  
28  
29

30  
31 Even though the interviews were done alone with the patient, it is possible that the patients were  
32 hesitant to openly share their views. There could have been barriers to the patients disclosing their  
33 concerns caused by for instance "I do not want to be a troublemaker", "I do not know how to raise  
34 my concern", or "I do not want to harm my relationship with members of the medical team"[33]. To  
35 reduce these concerns, the interviewer introduced herself as a researcher, wore casual attire, and  
36 informed the patient that interviews are analysed anonymously. Moreover, we informed the patients  
37 that participating or withdrawing or anything that they say will not influence their treatment in the  
38 hospital or EMS. Despite certain limitations, this study offers valuable insights into patients'  
39 perceptions of safety in EMS.  
40  
41  
42  
43  
44  
45  
46  
47  
48  
49  
50  
51

## 52 53 **CONCLUSIONS**

54  
55 The EMS personnel's social interactions seem to be associated with patients' perceptions of safety.  
56  
57 Thus, more attention should be directed to their social skills and their ability to create a  
58  
59  
60



1  
2  
3 psychologically safe environment for the patient. In addition, this study adds to the knowledge about  
4  
5 the factors contributing to or reducing patients' perception of safety when attended to by EMS  
6  
7 personnel. This information is valuable when EMS organizations design methods to involve patients  
8  
9 in developing their safety performance.  
10  
11  
12  
13

## 14 **ACKNOWLEDGEMENTS**

15  
16 We thank the EMS patients who shared their experiences with us. We also thank the emergency  
17  
18 department nurses for valuable help in recruiting patients.  
19  
20  
21

## 22 **CONFLICT OF INTEREST**

23  
24 All authors declare that they have no competing interests.  
25  
26  
27

## 28 **AUTHORS' CONTRIBUTIONS**

29  
30 All authors contributed to this study as follows: study design (AV, VL, MC), data collection (AV),  
31  
32 data analysis (AV, VL, ST), and writing the manuscript (AV, VL, MC, ST). All authors read and  
33  
34 approved the final manuscript.  
35  
36  
37

## 38 **FUNDING**

39  
40 Funding was provided by Finnish State Research Funding.  
41  
42  
43

## 44 **AVAILABILITY OF DATA AND MATERIAL**

45  
46 The data used and analysed during the study are available from the corresponding author on  
47  
48 reasonable request.  
49  
50  
51

## 52 **CONCENT FOR PUBLICATION**

53  
54 Not applicable.  
55  
56  
57  
58  
59  
60

## REFERENCES

1. Institute of Medicine (US) Committee on Quality of Health Care in America; Kohn LT, Corrigan JM, Donaldson MS, eds. *To Err is Human: Building a Safer Health System*. Washington (DC): National Academies Press (US); 2000. doi:10.17226/9728.
2. World Health Organization. Exploring patient participation in reducing health-care related safety risks. World Health Organization, Copenhagen. 2013. Available from: [http://www.euro.who.int/\\_\\_data/assets/pdf\\_file/0010/185779/e96814.pdf](http://www.euro.who.int/__data/assets/pdf_file/0010/185779/e96814.pdf) Accessed: 15 November 2019.
3. World Health Organization. Patient engagement. Technical series on safer primary care. Geneva: WHO, 2016. Available from: <https://apps.who.int/iris/bitstream/handle/10665/252269/9789241511629-eng.pdf>. Accessed: 15 November 2019.
4. Vincent C, Burnett S, Carthey J. Safety measurement and monitoring in healthcare: A framework to guide clinical teams and healthcare organizations in maintaining safety. *BMJ Qual Saf* 2014;23:670-677. doi:10.1136/bmjqs-2013-002757.
5. World Health Organization (WHO) 2009. Conceptual Framework for the International Classification for Patient Safety, Version 1.1, Final Technical Report. [https://apps.who.int/iris/bitstream/handle/10665/70882/WHO\\_IER\\_PSP\\_2010.2\\_eng.pdf?sequence=1](https://apps.who.int/iris/bitstream/handle/10665/70882/WHO_IER_PSP_2010.2_eng.pdf?sequence=1).
6. Sammer, C.E., Lykens, K., Singh, K.P., Mains, D.A. and Lackan, N.A. 2010. What is Patient Safety Culture? A Review of the Literature. *J Nurs Scholarsh*, 42: 156-165. doi:10.1111/j.1547-5069.2009.01330.x
7. Reiman T, Pietikäinen E, Oedewald P. Multilayered approach to patient safety culture. *Qual Saf Health Care* 2010;19. doi:10.1136/qshc.2008.029793.
8. Stavrianopoulos, T. 2012. The development of patient safety culture. *Health Sci J*, 6(2), 201.

- 1  
2  
3 9. Reis, C. T., Paiva, S. G., & Sousa, P. 2018. The patient safety culture: a systematic  
4 review by characteristics of hospital survey on patient safety culture dimensions. *Int J Qual*  
5 *Health Care*, 30(9), 660-677. doi: 10.1093/intqhc/mzy080  
6  
7  
8  
9  
10 10. Holgate R. The opinion of emergency medical service personnel regarding safety in  
11 pre-hospital emergency care practice. Johannesburg: University of the Witwatersrand,  
12 2015. Available from:  
13 <https://pdfs.semanticscholar.org/fbb6/a55bfbf33da065422982f16a79de87fd8a46.pdf>.  
14 Accessed: 15 November 2019.  
15  
16  
17  
18  
19 11. Brice JH, Studnek JR, Bigham BL, et al. EMS provider and patient safety during  
20 response and transport: Proceedings of an ambulance safety conference. *Prehosp Emerg*  
21 *Care*. 2012;16:3-19. doi:10.3109/10903127.2011.626106.  
22  
23  
24  
25 12. Weaver MD, Wang HE, Fairbanks RJ, Patterson D. The association between EMS  
26 workplace safety culture and safety outcomes. *Prehosp Emerg Care*. 2012;16(1):43-52.  
27 doi:10.3109/10903127.2011.614048  
28  
29  
30  
31 13. Salminen-Tuomaala M, Leikkola P, Paavilainen E. Patient and staff safety incidents  
32 and near misses in out-of-hospital emergency care. *Emergency Med* 2014;4:219.  
33 doi:10.4172/2165-7548.1000219.  
34  
35  
36  
37  
38 14. Salminen-Tuomaala M, Leikkola P, Paavilainen E. Emergency health care  
39 professionals' experiences of factors that influence care quality and safety. *Clin Nurs Stud*.  
40 2015;3:60-68. doi:10.5430/cns.v3n3p60.  
41  
42  
43  
44 15. Bigham BL, Buick JE, Brooks SC, Morrison M, Shojania KG, Morrison LJ. Patient  
45 safety in emergency medical services: A systematic review of the literature. *Prehosp*  
46 *Emerg Care*. 2012;16:20-35 doi:10.3109/10903127.2011.621045.  
47  
48  
49  
50  
51 16. Coster JE, Irving AD, Turner JK, Phung VH, Siriwardena AN. Prioritizing novel and  
52 existing ambulance performance measures through expert and lay consensus: A three-  
53 stage multimethod consensus study. *Health Expect*. 2018;21:249–260.  
54 doi:10.1111/hex.12610.  
55  
56  
57  
58  
59  
60

- 1  
2  
3 17. Fairbanks RJ, Crittenden CN, O'Gara KG, et al. Emergency medical services provider  
4 perceptions of the nature of adverse events and near-misses in out-of-hospital care: An  
5 ethnographic view. *Acad Emerg Med*. 2008;15:633-640. doi:10.1111/j.1553-  
6 2712.2008.00147.x.  
7  
8  
9  
10  
11 18. Rainey H, Ehrich K, Mackintosh N, Sandall J. The role of patients and their relatives in  
12 'speaking up' about their own safety - a qualitative study of acute illness. *Health Expect*.  
13 2015;18:392-405. doi: 10.1111/hex.12044.  
14  
15  
16  
17 19. Sahlström M, Partanen P, Azimirad M, Selander T, Turunen H. Patient participation in  
18 patient safety—An exploration of promoting factors. *J Nurs Manag*. 2019;27:84-92. doi:  
19 10.1111/jonm.12651.  
20  
21  
22  
23 20. McTier L, Botti M, Duke M. Patient participation in medication safety during an acute  
24 care admission. *Health Expect*. 2015;18:1744-1756. doi:10.1111/hex.12167.  
25  
26  
27  
28 21. Health Care Act 1326:2010. Ministry of Social Affairs and Health, Finland. 2013.  
29  
30  
31 22. Ministry of Social Affairs and Health decree of prehospital emergency care 585:2017.  
32 Ministry of Social Affairs and Health, Finland. 2017.  
33  
34  
35 23. Patton MQ. *Qualitative research and evaluation methods: Integrating theory and*  
36 *practice*. Fourth edition ed. California, United States of America: SAGE Publications, Inc.;  
37 2015:52-53.  
38  
39  
40  
41 24. Elo S, Kyngäs H. The qualitative content analysis process. *J Adv Nurs*. 2008;62:107-  
42 115. doi:10.1111/j.1365-2648.2007.04569.x.  
43  
44  
45  
46 25. Edmondson, A. "Psychological Safety, Trust and Learning: A Group-level Lens." In:  
47 Kramer R., Cook K. eds. *Trust and Distrust in Organizations: Dilemmas and Approaches*,  
48 239–272. New York: Russell Sage Foundation. 2004.  
49  
50  
51  
52 26. Sahlström M, Partanen P, Rathert C, Turunen H. Patient participation in patient safety  
53 still missing: Patient safety experts' views. *Int J Nurs Pract*. 2016;22(5):461-469.  
54 doi:10.1111/ijn.12476.  
55  
56  
57  
58  
59  
60

- 1  
2  
3 27. Bishop AC, Macdonald M. Patient involvement in patient safety: A qualitative study of  
4 nursing staff and patient perceptions. *J Patient Saf.* 2017;13:82-87.  
5  
6 doi:10.1097/PTS.000000000000123.  
7  
8  
9 28. Ahlenius M, Lindström V, Vicente V. Patients' experience of being badly treated in the  
10 ambulance service: A qualitative study of deviation reports in Sweden. *Int Emerg Nurs.*  
11 2017;30:25-30 doi:10.1016/j.ienj.2016.07.004.  
12  
13  
14  
15 29. Doyle C, Lennox L, Bell D. A systematic review of evidence on the links between  
16 patient experience and clinical safety and effectiveness. *BMJ*  
17 *Open* 2013;3:e001570. doi:10.1136/bmjopen-2012-001570  
18  
19  
20  
21 30. Togher FJ, O'Cathain A, Phung V-, Turner J, Siriwardena AN. Reassurance as a key  
22 outcome valued by emergency ambulance service users: A qualitative interview study.  
23 *Health Expect.* 2015;18:2951-2961. doi:10.1111/hex.12279.  
24  
25  
26  
27 31. Sahlström M, Partanen P, Turunen H. Safety as experienced by patients themselves: a  
28 Finnish survey of the most recent period of care. *Res Nurs Health.* 2014;37(3):194-203.  
29 doi:10.1002/nur.21589  
30  
31  
32  
33 32. Sjölin H, Lindström V, Hult H, Ringsted C, Kurland L. What an ambulance nurse needs  
34 to know: A content analysis of curricula in the specialist nursing programme in prehospital  
35 emergency care. *Int Emerg Nurs.* 2015;23:127-132. doi:10.1016/j.ienj.2014.09.002.  
36  
37  
38  
39 40 33. Bell SK, Roche SD, Mueller A, et al. Speaking up about care concerns in the ICU:  
41 Patient and family experiences, attitudes and perceived barriers. *BMJ Qual Saf.*  
42 2018;27:928-936. doi:10.1136/bmjqs-2017-007525.  
43  
44  
45  
46  
47  
48  
49  
50  
51  
52  
53  
54  
55  
56  
57  
58  
59  
60

1  
2  
3  
4  
5  
6 I, the Submitting Author has the right to grant and does grant on behalf of all authors of the Work (as defined in  
7 the below author licence), an exclusive licence and/or a non-exclusive licence for contributions from authors who  
8 are: i) UK Crown employees; ii) where BMJ has agreed a CC-BY licence shall apply, and/or iii) in accordance  
9 with the terms applicable for US Federal Government officers or employees acting as part of their official duties;  
10 on a worldwide, perpetual, irrevocable, royalty-free basis to BMJ Publishing Group Ltd (“BMJ”) its licensees and  
11 where the relevant Journal is co-owned by BMJ to the co-owners of the Journal, to publish the Work in BMJ  
12 Open and any other BMJ products and to exploit all rights, as set out in our licence.

13  
14 The Submitting Author accepts and understands that any supply made under these terms is made by BMJ to the  
15 Submitting Author unless you are acting as an employee on behalf of your employer or a postgraduate student of  
16 an affiliated institution which is paying any applicable article publishing charge (“APC”) for Open Access  
17 articles. Where the Submitting Author wishes to make the Work available on an Open Access basis (and intends  
18 to pay the relevant APC), the terms of reuse of such Open Access shall be governed by a Creative Commons  
19 licence – details of these licences and which Creative Commons licence will apply to this Work are set out in our  
20 licence referred to above.  
21  
22  
23  
24  
25  
26  
27  
28  
29  
30  
31  
32  
33  
34  
35  
36  
37  
38  
39  
40  
41  
42  
43  
44  
45  
46  
47  
48  
49  
50  
51  
52  
53  
54  
55  
56  
57  
58  
59  
60

1  
2  
3  
4  
5  
6  
7  
8  
9  
10  
11  
12  
13  
14  
15  
16  
17  
18  
19  
20  
21  
22  
23  
24  
25  
26  
27  
28  
29  
30  
31  
32  
33  
34  
35  
36  
37  
38  
39  
40  
41  
42  
43  
44  
45  
46  
47  
48  
49  
50  
51  
52  
53  
54  
55  
56  
57  
58  
59  
60

Figure legend: Overview of the categories

For peer review only

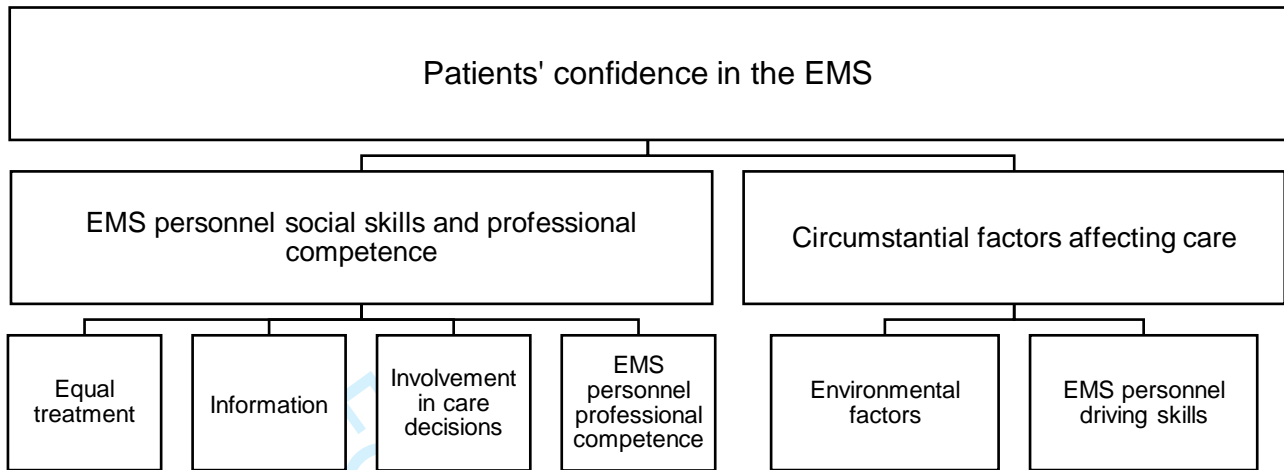

Figure 1. Overview of the categories.



1  
2  
3  
4  
5  
6  
7  
8  
9  
10  
11  
12  
13  
14  
15  
16  
17  
18  
19  
20  
21  
22  
23  
24  
25  
26  
27  
28  
29  
30  
31  
32  
33  
34  
35  
36  
37  
38  
39  
40  
41  
42  
43  
44  
45  
46  
47  
48  
49  
50  
51  
52  
53  
54  
55  
56  
57  
58  
59  
60

## Supplementary file 1: Interview guide

1. Can you tell me about your experience of the EMS encounter?
  - Additional questions:
    - Can you tell me more about the waiting time?
    - Can you tell me more about the assessment?
    - Can you tell me more about the treatment?
    - Can you tell me more about the transportation?
    - Can you tell me more about the handover at the ED?
2. What made you feel safe during the EMS encounter?
  - Follow up question if needed:
    - Can you tell me more about that?
3. Was there anything that made you feel insecure during the EMS encounter?
  - Follow up question if needed:
    - Can you tell me more about that?
4. Is there something else you want to tell me about the care in the EMS?

Supplementary file 2: Example of the coding tree

| Patients' descriptions                                                                                                                                                                                                                                                                                                                          | Subcategories                                                                                                     |                                                         |                                                                                    |                       |                                       |                              |
|-------------------------------------------------------------------------------------------------------------------------------------------------------------------------------------------------------------------------------------------------------------------------------------------------------------------------------------------------|-------------------------------------------------------------------------------------------------------------------|---------------------------------------------------------|------------------------------------------------------------------------------------|-----------------------|---------------------------------------|------------------------------|
|                                                                                                                                                                                                                                                                                                                                                 | Equal treatment                                                                                                   | Information                                             | Involvement in care decisions                                                      | Environmental factors | EMS personnel professional competence | EMS personnel driving skills |
| <p><i>They weren't sort of formal. So, they were like a human next to a human. So, I feel that this is a very important thing at least for me personally. So, like if they look like officials/formal and just very formally ask these questions it is different than if they are not as formal. It creates a sort of pleasant feeling.</i></p> | <p>Don't feel nice if acting is too official</p> <p>Natural acting (not too official) makes relationship nice</p> |                                                         |                                                                                    |                       |                                       |                              |
| <p><i>Well then, the ambulance staff interviewed me and they took all sorts of test and I don't know what they took but I think we were there for an hour and then they said that we should get to the hospital because it won't go away otherwise. So, then we came here and now I am here.</i></p>                                            |                                                                                                                   | <p>Lack of information about assessment and results</p> |                                                                                    |                       |                                       |                              |
| <p><i>And nothing else other than lie down inside the ambulance and cannula was inserted into my hand and I have type 1 diabetes so they took my blood sugar levels, there was nothing alarming in those readings and they asked if I want to have pain medications and I said I don't need any and every five minutes</i></p>                  |                                                                                                                   |                                                         | <p>Ask patient need for pain medication</p> <p>Ask patient feelings during the</p> |                       |                                       |                              |

1  
2  
3  
4  
5  
6  
7  
8  
9  
10  
11  
12  
13  
14  
15  
16  
17  
18  
19  
20  
21  
22  
23  
24  
25  
26  
27  
28  
29  
30  
31  
32  
33  
34  
35  
36  
37  
38  
39  
40  
41  
42  
43  
44  
45  
46

|                                                                                                                                                                                                                                                                                                                                                                                                                                                                                                                                                                                                                                                       |  |  |           |                                    |                                                                                                                                                                                      |                 |
|-------------------------------------------------------------------------------------------------------------------------------------------------------------------------------------------------------------------------------------------------------------------------------------------------------------------------------------------------------------------------------------------------------------------------------------------------------------------------------------------------------------------------------------------------------------------------------------------------------------------------------------------------------|--|--|-----------|------------------------------------|--------------------------------------------------------------------------------------------------------------------------------------------------------------------------------------|-----------------|
| <p><i>they asked if I was feeling ok. One of the paramedic's was chatting to me and taking down information and then we arrived at the hospital and we came into this treatment room and I could not imagine any better treatment or transportation or anything.</i></p>                                                                                                                                                                                                                                                                                                                                                                              |  |  | transport |                                    |                                                                                                                                                                                      |                 |
| <p><i>Well I did not hold on to anything, so I was just able to be sort of relaxed. But it did shake and bounce, so the road is worse there, but we got there regardless.</i></p>                                                                                                                                                                                                                                                                                                                                                                                                                                                                     |  |  |           | Shaky and bouncy ride<br>Bad roads |                                                                                                                                                                                      |                 |
| <p><i>Well... They did investigations, like for example this morning. So, then they said that they don't understand so they will bring me here. Probably it was somewhat tricky what this illness may be, I don't know. Because it was only two weeks ago when I was here. The transportations were similar. And then when we left home they apparently stopped because I felt that it can't be this smooth on the road. They tried to insert, and it failed so it was not inserted (shows cannula). They can insert it soon at the hospital, apparently the veins are so fragile. That's why it failed. Yeah, I don't know what else to say.</i></p> |  |  |           |                                    | Lack of knowledge (EMS personnel)<br><br>Solution is to transport to the hospital<br><br>Uncertainty to put an IV (paramedics try first and then decide to leave it to the hospital) |                 |
| <p><i>It was good because I was tied securely so I did not sway, and the ambulance</i></p>                                                                                                                                                                                                                                                                                                                                                                                                                                                                                                                                                            |  |  |           |                                    |                                                                                                                                                                                      | Not driving too |

1  
2  
3  
4  
5  
6  
7  
8  
9  
10  
11  
12  
13  
14  
15  
16  
17  
18  
19  
20  
21  
22  
23  
24  
25  
26  
27  
28  
29  
30  
31  
32  
33  
34  
35  
36  
37  
38  
39  
40  
41  
42  
43  
44  
45  
46

|                                                                                                                                                |  |  |  |  |  |                                                                      |
|------------------------------------------------------------------------------------------------------------------------------------------------|--|--|--|--|--|----------------------------------------------------------------------|
| <p><i>driver did not drive recklessly and then I knew it was safe to be aboard on the way to get treatment. And to be in expert hands.</i></p> |  |  |  |  |  | <p>fast<br/><br/>Sens of safety when get transported to hospital</p> |
|------------------------------------------------------------------------------------------------------------------------------------------------|--|--|--|--|--|----------------------------------------------------------------------|

For peer review only

1  
2  
3  
4  
5  
6  
7  
8  
9  
10  
11  
12  
13  
14  
15  
16  
17  
18  
19  
20  
21  
22  
23  
24  
25  
26  
27  
28  
29  
30  
31  
32  
33  
34  
35  
36  
37  
38  
39  
40  
41  
42  
43  
44  
45  
46

For peer review only

## COREQ (CONsolidated criteria for REporting Qualitative research) Checklist

A checklist of items that should be included in reports of qualitative research. You must report the page number in your manuscript where you consider each of the items listed in this checklist. If you have not included this information, either revise your manuscript accordingly before submitting or note N/A.

| Topic                                          | Item No. | Guide Questions/Description                                                                                                                              | Reported on Page No. |
|------------------------------------------------|----------|----------------------------------------------------------------------------------------------------------------------------------------------------------|----------------------|
| <b>Domain 1: Research team and reflexivity</b> |          |                                                                                                                                                          |                      |
| <i>Personal characteristics</i>                |          |                                                                                                                                                          |                      |
| Interviewer/facilitator                        | 1        | Which author/s conducted the interview or focus group?                                                                                                   |                      |
| Credentials                                    | 2        | What were the researcher's credentials? E.g. PhD, MD                                                                                                     |                      |
| Occupation                                     | 3        | What was their occupation at the time of the study?                                                                                                      |                      |
| Gender                                         | 4        | Was the researcher male or female?                                                                                                                       |                      |
| Experience and training                        | 5        | What experience or training did the researcher have?                                                                                                     |                      |
| <i>Relationship with participants</i>          |          |                                                                                                                                                          |                      |
| Relationship established                       | 6        | Was a relationship established prior to study commencement?                                                                                              |                      |
| Participant knowledge of the interviewer       | 7        | What did the participants know about the researcher? e.g. personal goals, reasons for doing the research                                                 |                      |
| Interviewer characteristics                    | 8        | What characteristics were reported about the interviewer/facilitator? e.g. Bias, assumptions, reasons and interests in the research topic                |                      |
| <b>Domain 2: Study design</b>                  |          |                                                                                                                                                          |                      |
| <i>Theoretical framework</i>                   |          |                                                                                                                                                          |                      |
| Methodological orientation and Theory          | 9        | What methodological orientation was stated to underpin the study? e.g. grounded theory, discourse analysis, ethnography, phenomenology, content analysis |                      |
| <i>Participant selection</i>                   |          |                                                                                                                                                          |                      |
| Sampling                                       | 10       | How were participants selected? e.g. purposive, convenience, consecutive, snowball                                                                       |                      |
| Method of approach                             | 11       | How were participants approached? e.g. face-to-face, telephone, mail, email                                                                              |                      |
| Sample size                                    | 12       | How many participants were in the study?                                                                                                                 |                      |
| Non-participation                              | 13       | How many people refused to participate or dropped out? Reasons?                                                                                          |                      |
| <i>Setting</i>                                 |          |                                                                                                                                                          |                      |
| Setting of data collection                     | 14       | Where was the data collected? e.g. home, clinic, workplace                                                                                               |                      |
| Presence of non-participants                   | 15       | Was anyone else present besides the participants and researchers?                                                                                        |                      |
| Description of sample                          | 16       | What are the important characteristics of the sample? e.g. demographic data, date                                                                        |                      |
| <i>Data collection</i>                         |          |                                                                                                                                                          |                      |
| Interview guide                                | 17       | Were questions, prompts, guides provided by the authors? Was it pilot tested?                                                                            |                      |
| Repeat interviews                              | 18       | Were repeat interviews carried out? If yes, how many?                                                                                                    |                      |
| Audio/visual recording                         | 19       | Did the research use audio or visual recording to collect the data?                                                                                      |                      |
| Field notes                                    | 20       | Were field notes made during and/or after the interview or focus group?                                                                                  |                      |
| Duration                                       | 21       | What was the duration of the interviews or focus group?                                                                                                  |                      |
| Data saturation                                | 22       | Was data saturation discussed?                                                                                                                           |                      |
| Transcripts returned                           | 23       | Were transcripts returned to participants for comment and/or                                                                                             |                      |

| Topic                                  | Item No. | Guide Questions/Description                                                                                                        | Reported on Page No. |
|----------------------------------------|----------|------------------------------------------------------------------------------------------------------------------------------------|----------------------|
|                                        |          | correction?                                                                                                                        |                      |
| <b>Domain 3: analysis and findings</b> |          |                                                                                                                                    |                      |
| <i>Data analysis</i>                   |          |                                                                                                                                    |                      |
| Number of data coders                  | 24       | How many data coders coded the data?                                                                                               |                      |
| Description of the coding tree         | 25       | Did authors provide a description of the coding tree?                                                                              |                      |
| Derivation of themes                   | 26       | Were themes identified in advance or derived from the data?                                                                        |                      |
| Software                               | 27       | What software, if applicable, was used to manage the data?                                                                         |                      |
| Participant checking                   | 28       | Did participants provide feedback on the findings?                                                                                 |                      |
| <i>Reporting</i>                       |          |                                                                                                                                    |                      |
| Quotations presented                   | 29       | Were participant quotations presented to illustrate the themes/findings?<br>Was each quotation identified? e.g. participant number |                      |
| Data and findings consistent           | 30       | Was there consistency between the data presented and the findings?                                                                 |                      |
| Clarity of major themes                | 31       | Were major themes clearly presented in the findings?                                                                               |                      |
| Clarity of minor themes                | 32       | Is there a description of diverse cases or discussion of minor themes?                                                             |                      |

Developed from: Tong A, Sainsbury P, Craig J. Consolidated criteria for reporting qualitative research (COREQ): a 32-item checklist for interviews and focus groups. *International Journal for Quality in Health Care*. 2007. Volume 19, Number 6: pp. 349 – 357

**Once you have completed this checklist, please save a copy and upload it as part of your submission. DO NOT include this checklist as part of the main manuscript document. It must be uploaded as a separate file.**

# BMJ Open

## PATIENTS' PERCEPTIONS OF SAFETY IN EMERGENCY MEDICAL SERVICES – AN INTERVIEW STUDY

|                                 |                                                                                                                                                                                                                                                                                                                                                                                                                                                                                                                                                                                                                                                                    |
|---------------------------------|--------------------------------------------------------------------------------------------------------------------------------------------------------------------------------------------------------------------------------------------------------------------------------------------------------------------------------------------------------------------------------------------------------------------------------------------------------------------------------------------------------------------------------------------------------------------------------------------------------------------------------------------------------------------|
| Journal:                        | <i>BMJ Open</i>                                                                                                                                                                                                                                                                                                                                                                                                                                                                                                                                                                                                                                                    |
| Manuscript ID                   | bmjopen-2020-037488.R3                                                                                                                                                                                                                                                                                                                                                                                                                                                                                                                                                                                                                                             |
| Article Type:                   | Original research                                                                                                                                                                                                                                                                                                                                                                                                                                                                                                                                                                                                                                                  |
| Date Submitted by the Author:   | 21-Aug-2020                                                                                                                                                                                                                                                                                                                                                                                                                                                                                                                                                                                                                                                        |
| Complete List of Authors:       | Venesoja, Anu; South Karelia Social and Health Care District, Acute care unit; Department of Emergency Medicine and Services, Helsinki University Hospital, Helsinki University, Department of Emergency Medicine and Services<br>Castrén, Maaret; Department of Emergency Medicine and Services, Helsinki University Hospital, Helsinki University, Department of Emergency Medicine and Services<br>Tella, Susanna; LAB University of Applied Sciences; University of Eastern Finland Faculty of Health Sciences<br>Lindström, Veronica ; Karolinska Institutet, Department of Neurobiology, Care Sciences and Society, section of Nursing); Samariten Ambulance |
| <b>Primary Subject Heading</b>: | Nursing                                                                                                                                                                                                                                                                                                                                                                                                                                                                                                                                                                                                                                                            |
| Secondary Subject Heading:      | Emergency medicine, Qualitative research                                                                                                                                                                                                                                                                                                                                                                                                                                                                                                                                                                                                                           |
| Keywords:                       | ACCIDENT & EMERGENCY MEDICINE, QUALITATIVE RESEARCH, Health & safety < HEALTH SERVICES ADMINISTRATION & MANAGEMENT                                                                                                                                                                                                                                                                                                                                                                                                                                                                                                                                                 |
|                                 |                                                                                                                                                                                                                                                                                                                                                                                                                                                                                                                                                                                                                                                                    |

SCHOLARONE™  
Manuscripts





I, the Submitting Author has the right to grant and does grant on behalf of all authors of the Work (as defined in the below author licence), an exclusive licence and/or a non-exclusive licence for contributions from authors who are: i) UK Crown employees; ii) where BMJ has agreed a CC-BY licence shall apply, and/or iii) in accordance with the terms applicable for US Federal Government officers or employees acting as part of their official duties; on a worldwide, perpetual, irrevocable, royalty-free basis to BMJ Publishing Group Ltd ("BMJ") its licensees and where the relevant Journal is co-owned by BMJ to the co-owners of the Journal, to publish the Work in this journal and any other BMJ products and to exploit all rights, as set out in our [licence](#).

The Submitting Author accepts and understands that any supply made under these terms is made by BMJ to the Submitting Author unless you are acting as an employee on behalf of your employer or a postgraduate student of an affiliated institution which is paying any applicable article publishing charge ("APC") for Open Access articles. Where the Submitting Author wishes to make the Work available on an Open Access basis (and intends to pay the relevant APC), the terms of reuse of such Open Access shall be governed by a Creative Commons licence – details of these licences and which [Creative Commons](#) licence will apply to this Work are set out in our licence referred to above.

Other than as permitted in any relevant BMJ Author's Self Archiving Policies, I confirm this Work has not been accepted for publication elsewhere, is not being considered for publication elsewhere and does not duplicate material already published. I confirm all authors consent to publication of this Work and authorise the granting of this licence.

1  
2  
3  
4  
5 **PATIENTS' PERCEPTIONS OF SAFETY IN EMERGENCY MEDICAL SERVICES – AN**  
6  
7 **INTERVIEW STUDY**  
8  
9

10 Anu Venesoja, RN, MHSc, PhD-student <sup>1,2</sup>; Maaret Castrén, MD, PhD <sup>2</sup>; Susanna Tella,  
11 RN, PhD <sup>3,4</sup>; Veronica Lindström, RN, PhD <sup>5,6</sup>  
12  
13

14  
15  
16 <sup>1</sup> South Carelia Social and Healthcare District, Finland; <sup>2</sup> Department of Emergency  
17 Medicine and Services, Helsinki University Hospital, Helsinki University, Helsinki, Finland;  
18  
19 <sup>3</sup> LAB University of Applied Sciences, Finland; <sup>4</sup> University of Eastern Finland; <sup>5</sup> Samariten  
20 Ambulance, Stockholm, Sweden; <sup>6</sup> Karolinska Institutet, Department of Neurobiology, Care  
21 Sciences, and Society Division of Nursing Stockholm, Sweden.  
22  
23  
24  
25

26 **Short running title:** EMS patients' experiences of safety  
27  
28

29  
30 **Corresponding author:**  
31

32 Anu Venesoja  
33

34 Address: Timonkatu 29, FI-55100 Imatra, Finland  
35

36 E-mail: [anu.venesoja@helsinki.fi](mailto:anu.venesoja@helsinki.fi)  
37

38 Telephone: +358-405575824  
39

40 Word count: 4443  
41  
42  
43  
44  
45  
46  
47  
48  
49  
50  
51  
52  
53  
54  
55  
56  
57  
58  
59  
60

# PATIENTS' PERCEPTIONS OF SAFETY IN EMERGENCY MEDICAL SERVICES

## – AN INTERVIEW STUDY

### ABSTRACT

**Background:** Research on patient safety in Emergency Medical Services (EMS) has mainly focused on the organization's and/or the EMS personnel's perspective. Little is known about how patients perceive safety in EMS. This study aims to describe the patients' experiences of their sense of safety in EMS.

**Methods:** A qualitative design with individual interviews of EMS patients (n=21) and an inductive qualitative content analysis were used.

**Results:** Patients' experiences of EMS personnel's ability or inability to show or use their medical, technical, and driving skills affected the patients' sense of safety. When they perceived a lack of professionalism and knowledge among EMS personnel, they felt unsafe. Patients highlighted equality in the encounter, the quality of the information given by EMS personnel, and the opportunity to participate in their care as important factors creating a sense of safety during the EMS encounter. Altogether, patients' perceptions of safety in EMS were connected to their confidence in the EMS personnel.

**Conclusions:** Overall, patients felt safe during their EMS encounter, but the EMS personnel's professional competence alone is not enough for them to feel safe. Lack of communication or professionalism may compromise their sense of safety. Further work is needed to explore how patients' perceptions of safety can be utilized in improving safety in EMS.

**Keywords:** Ambulance service; patient perception; qualitative study; safety; prehospital nurse

### Strengths and limitations of this study

- This study provides knowledge about what patients consider important for feeling safe in the EMS.
- Detailed, rich information was captured and analysed of individual patient perceptions of their safety during their interactions with EMS.
- A limitation is that the interviews were done in a small hospital district, which could limit the transferability of the results.

## BACKGROUND

"To err is human"[1], but it can at worst cause disastrous results for patients seeking care and for the organization caring for them. Therefore, systematic development and research are needed to ensure and improve patient safety and quality of care. Errors are described as being usually caused by faulty systems, processes, or conditions in the organization rather than by individual health care workers, and thus, all health care actors, including patients, should be involved in developing the safety culture in health care. Global recommendations and guidelines to improve patient safety include the patients as active team members whenever possible[1-3]. Patients' experiences of difficulties and harms can provide information about safety, which is not obvious to healthcare staff[4].

The World Health Organization (WHO) has defined the term safety culture as *the product of individual and group values, attitudes, perceptions, competencies, and patterns of behavior that determine the commitment to, and the style and proficiency of, an organization's health and safety management*. According to WHO, another definition for safety culture is *an integrated pattern of individual and organizational behavior, based upon shared beliefs and values, that continuously seeks to minimize patient harm which may result from the processes of care delivery*. [5] When researchers use the term "patient safety culture", they define sections of safety culture which have an impact on patient safety. [6-9] Considering this relationship between safety culture and patient safety culture, it is essential to recognize how relationship affects the patients' perceptions of safety. In this study, safety in emergency medical services (EMS) is explored from the patients' perspective. The EMS includes health care professionals who respond to emergency calls, assessing, treating, and transporting patients to health care providers such as the emergency department (ED).

## **Safety and patient safety in emergency medical services**

By nature, EMS can be considered a challenging and constantly changing environment compared with other emergency care settings such as hospitals. The hospital environment is especially built for patient care whereas the EMS personnel treat the patients in their homes, in public, inside the ambulance or outdoors. Because the environment is not always predictable in EMS, it could compromise the safety of both EMS personnel and patients. Transporting a patient to hospital by ambulance could also be a hazardous situation. The risks of traffic accidents are known to increase if driving with lights and sirens [10-11]. There is some evidence that safety culture and patient and EMS provider safety outcomes are interrelated. EMS personnel who reported an error or adverse event (AE) evaluate safety culture lower than those who did not report an error or AE.

Furthermore, EMS personnel who reported safety-compromising behavior evaluate safety culture lower than those who did not.[12]

Otherwise, patient safety studies within the EMS setting have mainly investigated AE, mishaps, near-misses, occupational hazards, and patient safety or quality of care, and these previous studies have mainly focused on the organization's or EMS personnel's perspective and ignored the patients' point of view on safety[13-17]. Patient safety from the their own viewpoint has mainly been investigated in hospital settings, showing that they give valuable insights into improving or assessing patient safety[18-20]. As the EMS personnel sometimes has to work in a challenging environment, including risks of driving hazards, there is a need to investigate the patients' perceptions of safety in the EMS. Therefore, the aim of this study was to describe the patients' perceptions of safety in the EMS.

## METHODS

A qualitative study design with individual interviews was used to explore patients' perceptions of safety in the EMS.

### Setting

This study was carried out in Finland, where the Hospital Districts are responsible for organizing the EMS. The Finnish EMS consists of advanced-level ambulances and basic-level ambulances, and every hospital district must have at least one EMS officer (operational supervisor of the shift, participates in challenging tasks). The advanced-level ambulances are staffed with two prehospital nurses or one prehospital nurse and another qualified person, e.g. nurse or other health care professional or rescue worker. The education level among advanced-level prehospital nurses is at least a registered nurse (3.5 years) with advanced life support education (one year alongside the work) or a prehospital nurse (4 years). Basic-level ambulances are manned by at least one emergency medical technician (EMT)[21,22]. The EMS officer should be an advanced-level prehospital nurse with operative leadership education (for example Masters' degree or one-year operational leadership education) and leadership experience. The highest educated EMS personnel is always responsible for patient care, but when the patient is assessed as low priority, a nurse, EMT, or other health care professional can attend to the them during transport.

The health care district this study was conducted in is eastern Finland and it covers approximately 132 000 inhabitants. There is one central hospital in the district and ambulance services cover an area 6872.10km<sup>2</sup>, including both rural and urban regions. Ambulance transports vary between 1 and over 100km. In 2017, there were about 22 100 EMS requests in the area according to official statistics. At present (in 2018), there are one EMS officer, 11 ambulances, all of them advanced level ambulances, and in addition there are two units with the assignments to treat and evaluate low priority patients at home. The

1  
2  
3 units have the same equipment as the ambulance and point-of-care devices, but they are  
4  
5 not capable of transporting the patient.  
6  
7  
8

### 9 **Data collection and participants**

10  
11 Data collection was undertaken at the central hospital ED, where patients are transported  
12  
13 by EMS. Data were collected via semi-structured interviews during a two-week period in  
14  
15 March 2018. The interviews were conducted by the first author, a prehospital nurse with 20  
16  
17 years' working experience in the EMS, who has not had any professional or personal  
18  
19 contact with the participants beforehand. Purposeful sampling [23] was used, aiming to  
20  
21 achieve variation (gender, age, urban/rural area, primary condition) among participants  
22  
23 without risking patient safety. The inclusion criteria were as follows: the patient was  
24  
25 transported by the EMS to the ED after an emergency call to the emergency response  
26  
27 centre (ERC). The patient was assessed as low priority in the ED or the patient was  
28  
29 transported to the hospital as high priority, but the priority was assessed as low after  
30  
31 treatment in the ED. The patients needing urgent treatment in the ED, patients under the  
32  
33 influence of alcohol (based on ED nurses' assessment) or drugs and inter-hospital  
34  
35 transports were excluded. Additional exclusion criteria were being younger than 18 years  
36  
37 of age, incapability of communicating in Finnish, or presence of dementia, confusion, or  
38  
39 terminal disease. ED nurses identified eligible participants. The first author received a list  
40  
41 of eligible participants from the ED nurse, gave oral and written information about the  
42  
43 study and asked about participation after patients had received their initial assessment  
44  
45 and treatment at the ED.  
46  
47  
48  
49  
50  
51

52  
53 All interviews were performed on weekdays between 8 am to 4 pm, although some of the  
54  
55 interviewed patients had been transported to the ED in the night-time. The first, second, and  
56  
57 last authors (the first and last authors with working experience in EMS as prehospital nurses,  
58  
59 and the second author with experience as an EMS physician) together devised the interview  
60



1  
2  
3 questions. The interviews started with an open-ended question: “*Can you tell me about your*  
4 *experience of the EMS encounter?*” To encourage patients to share their experiences,  
5  
6  
7 additional questions were asked concerning waiting time, assessment, treatment,  
8  
9  
10 transportation, and the handover at the ED. The interviews were concluded by asking the  
11  
12 patients to describe what made them feel safe or insecure during the EMS encounter. The  
13  
14 interview guide is presented in supplementary file 1. The authors held multiple discussions  
15  
16 during the data collection. The interviews lasted between 10 and 20 minutes. The interviews  
17  
18 continued until no new information was obtained during the interviews. The variations in the  
19  
20 interviews started to be limited during interview 15, but six more interviews were conducted  
21  
22 aiming to ensure that no new variations would emerge. All the interviews were recorded with  
23  
24 a digital recorder and transcribed verbatim by the first author. All the transcriptions were  
25  
26 anonymised. Two of the interviews were translated from Finnish into English to achieve  
27  
28 transparency among all authors participating in the study.  
29  
30  
31  
32  
33  
34

### 35 **Patient and public involvement**

36  
37 The patients or the public were not involved in the design and conduct of this study.  
38  
39

### 40 **Data analysis**

41  
42 An inductive qualitative content analysis was used to analyse the data[24]. The analysis  
43  
44 began after all interviews had been listened to and transcribed. The text was then read  
45  
46 several times to obtain a sense of the whole and to identify the patients’ expressions about  
47  
48 their perceptions of safety in the EMS. The expressions were single words or short  
49  
50 sentences. The third author, who had no experience in EMS, but had working knowledge of  
51  
52 patient safety research, read the transcripts with the aim of increasing the reliability of the  
53  
54 process and verifying the first phase of open coding, in which similar expressions received  
55  
56  
57  
58  
59  
60

1  
2  
3 the same open code. The coding was made without using any software for analysis. An  
4  
5 example of the coding tree is presented in supplementary file 2.  
6

7  
8 After the open coding, the codes were collected into a sheet with other related codes. These  
9  
10 coding sheets were then abstracted into sub-categories, which were grouped into generic  
11  
12 categories and finally into the main category. During the analysis, there was a recurrent  
13  
14 movement between the whole and the parts. The authors held multiple discussions to  
15  
16 ensure the reliability and credibility of the analysis, keeping the balance between their pre-  
17  
18 understanding and openness to the content during the analysis. In every phase, the analysis  
19  
20 continued until consensus between the researchers was reached. The last phase in the  
21  
22 analysis was the conceptualization of the results, displayed in Figure 1.  
23  
24  
25  
26  
27

### 28 **Ethical considerations**

29  
30  
31 This study was approved by the Ethics Committee of Helsinki University Hospital  
32  
33 (HUS/3529/2017). The patients received written information about the purpose of the study  
34  
35 with contact information for the responsible researcher, and they had the possibility to ask  
36  
37 the first author questions about the research. The patients filled out a form affirming their  
38  
39 voluntary participation in the study. The patients were informed that they have the right to  
40  
41 withdraw from the study at any phase. During the interviews, the first author observed the  
42  
43 patients and discontinued the discussion if any changes occurred in the patient's physical  
44  
45 or mental condition.  
46  
47  
48  
49  
50

### 51 **RESULTS**

52  
53 In total, 22 patients were asked to participate, 21 of whom agreed to participate in the  
54  
55 study. One male refused the interview without providing a reason. Some of the patients  
56  
57 had used EMS more than once and for some of them, this was a first contact to the EMS.  
58  
59  
60

The main reason for seeking EMS care was cardiac-related symptoms or breathing difficulties, as displayed in Table 1. Two of the patients did not describe their health problem or the reason for requesting an ambulance.

Table 1. Description of patients.

|                                                | Female<br>n=12 | Male<br>n=9  |
|------------------------------------------------|----------------|--------------|
| Age range (mean)                               | 44–91 (74.5)   | 41–86 (68.1) |
| Transported from urban area                    | 7              | 5            |
| Transported from rural area                    | 5              | 4            |
| <i>Primary condition as patients described</i> |                |              |
| Breathing difficulties                         | 4              | 1            |
| Cardiac-related symptoms                       | 3              | 2            |
| Gastrointestinal problems                      | 2              | 1            |
| Lower body pain                                | 1              | 1            |
| Minor injury                                   | -              | 2            |
| Neurological symptoms                          | -              | 2            |
| Missing data                                   | 2              | -            |

The main category *Patients' confidence in the EMS* shows that the patients feel safe in the EMS and have confidence in EMS personnel. The patients' confidence in the EMS personnel were divided in two generic categories: *EMS personnel's social skills* and *circumstantial factors affecting patients' care*. EMS personnel's social skills and professional competence consist of subcategories *equal treatment*, *information*, *involvement in care decisions* and *EMS personnel's professional competence*. Circumstantial factors affecting patients' care is composed of subcategories *environmental factors* and *EMS personnel's driving skills*. (Figure 1). The generic categories with their sub-categories are presented below with illustrative quotations.

## EMS personnel social's skills and professional competence

The EMS personnel's social skills and professional competence that affected patients' sense of safety in EMS included being treated equally, receiving information, being involved in their care, and getting professional treatment.

### Equal treatment

According to the patients, equal treatment and a reliable patient-EMS personnel relationship generated a sense of safety in the EMS. The patients noted that it is essential that the EMS personnel's behaviour is calm, natural, and friendly. They expressed that a bit of humour and small talk during the care lighten the atmosphere and help to create a good patient-EMS personnel relationship.

*"They didn't feel like officials. They were like human to human." (Pt5)*

On the other hand, patients said that they felt insecure or that the EMS personnel acted in a condescending way when the personnel's behaviour was rushed, negative or too official, or when the personnel lacked communication skills. The patients also stated that the EMS personnel did not always take their concerns seriously and sometimes ignored them altogether. This was reflected in how patients described situations where their mental and/or physical condition created a feeling of insecurity, e.g. if they had difficulties with breathing, felt lonely, or had to wait for the ambulance for a long time. Feeling insecure because of condescending treatment caused a sense of being unsafe among the patients.

*"Waiting is the worst, especially if you are alone and there isn't anyone with you."*

*(Pt6)*

### Information

Most patients mentioned that the EMS personnel handed over enough information about the assessments, a student presence, environmental conditions, treatment, and medication

1  
2  
3 as well as about driving with lights and sirens on. In addition, if the EMS personnel had  
4  
5 contacted the hospital beforehand, the patients expressed that the information had  
6  
7 transferred to the hospital personnel. The patients described that in these situations their  
8  
9 treatment in the hospital started smoothly and quickly. However, some patients mentioned  
10  
11 not getting enough information. Usually, the lack of information concerned what the EMS  
12  
13 personnel has assessed, the assessments results or the patient's medication during care.  
14  
15 Even these patients maintained confidence in the EMS personnel and their professionalism  
16  
17 because of the feeling that they received help from EMS personnel. Lack of information thus  
18  
19 had negligible impact on patients' feelings of safety in the EMS.  
20  
21  
22

23  
24 *"Ambulance personnel interviewed me and they took all sorts of assessments and I*  
25  
26 *don't know all the assessments they took."* (Pt13)  
27  
28  
29

### 30 Involvement in care decisions

31  
32 According to the patients, their involvement in care decisions varied. The patients' possibility  
33  
34 to affect their transport position had an impact on their sense of safety. Especially the ones  
35  
36 suffering from breathing problems stated that they wanted to sit on the seat rather than lay  
37  
38 on the stretcher even if they were placed in an upright position. However, EMS personnel  
39  
40 usually ignored this wish without explaining why it was not possible. Although some of the  
41  
42 patients said that they did not have the chance to influence how they were moved to the  
43  
44 ambulance or what position or where to stay during the transport, they did not automatically  
45  
46 consider it negative.  
47  
48  
49

50  
51 *"They didn't let me walk anymore, they were pushing (with the stretchers) the old*  
52  
53 *granny ... it sort of gives a nice feeling that somebody is still taking care of the old*  
54  
55 *granny."* (Pt5)  
56  
57  
58  
59  
60

1  
2  
3 In some situations regarding safety, the patients took an active role. For example, they  
4 asked the EMS personnel to put safety belts on or they asked to reduce ambulance speed  
5 if they felt that the speed compromised their safety.  
6  
7  
8

9  
10 *"I said that at least put the seatbelt on me. If you drive off the road, I fly out of here*  
11 *(from the stretchers) because I don't have the seatbelt on."* (Pt10)  
12  
13  
14

15  
16 EMS personnel's professional competence

17  
18 Patients stated that EMS personnel's professional competence made them feel safe during  
19 care. According to them, good professional competence means asking questions related to  
20 their health problems, background information about previous illnesses, medication, home  
21 situation, etc., and taking assessments and giving medication when needed. These factors  
22 made them feel that the treatment had started immediately and that the EMS personnel  
23 were interested in their health problem. Furthermore, the patients mentioned that when the  
24 EMS personnel supervised and gave guidance to the student it also had an effect on the  
25 patient's perception of the EMS personnel's professional competence. They noted that the  
26 EMS personnel mainly had good professional competence from their point of view.  
27  
28  
29  
30  
31  
32  
33  
34  
35  
36  
37

38  
39 *"The guys inserted an IV (intravenous cannula) and did assessments. Very*  
40 *professional personnel inserted the IV into my forearm, so they are very well*  
41 *educated."* (Pt11)  
42  
43  
44

45  
46 *"They took care of me and measured my blood pressure and gave me the*  
47 *medication orally and that made me feel safe."* (Pt8)  
48  
49

50  
51 However, some of the patients perceived that the EMS personnel lacked professional  
52 competence, and this affected their sense of safety. This situation occurred when the EMS  
53 personnel were uncertain of what had caused the patients' health problem or when the  
54 patient became aware that the EMS personnel had a lack of knowledge, e.g. when the only  
55 solution to the problem in the EMS personnel's view was to transport the patient to the  
56  
57  
58  
59  
60

1  
2  
3 hospital. In addition, when the personnel were unable to put in an IV, the patients interpreted  
4  
5 it as a lack of professional competence. These factors made the patient feel uncertain and  
6  
7 unsafe.  
8

9  
10 *"They said that they don't understand, and they brought me here (hospital)... they*  
11  
12 *tried to insert an IV in my forearm and it failed."* (Pt3)  
13  
14

### 15 16 **Circumstantial factors affecting care**

17  
18 Environmental factors (e.g. road and weather conditions, ambulance suspension, and  
19  
20 conditions inside the ambulance during the transport) and driving skills create the  
21  
22 circumstances where the EMS patients get treatment. These circumstantial factors were  
23  
24 highlighted when the patients talked about their perceptions of factors affecting the care and  
25  
26 sense of safety in EMS.  
27  
28

#### 29 30 31 Environmental factors

32  
33 Environmental factors markedly affect patients' feelings of safety in EMS. They feel that  
34  
35 EMS provides an essential public safety function. Almost all of the patients interviewed had  
36  
37 some preconceived notions of how the EMS works, expectations based on their own  
38  
39 perceptions or on how the service has been described in the media. Quick response times  
40  
41 increase their perceptions of safety. However, the experience of a quick response time  
42  
43 varied between the patients. They mentioned that they felt safe while the ambulance  
44  
45 transported them to hospital. They also described a feeling of relief and security when the  
46  
47 EMS personnel arrived and brought help to them with good equipment.  
48  
49  
50

51  
52 *" Because I know that every time when I call an ambulance, help is near."* (Pt13)  
53

54  
55 Some environmental issues reduced the patients' feeling of safety or made them  
56  
57 uncomfortable. Uncomfortable and narrow stretchers and difficulties in getting inside the  
58  
59 ambulance impair the experience of the care. The experience of feeling bad increased if the  
60

1  
2  
3 temperature was too hot or too cold during the transport. Bad, bumpy roads or poor  
4  
5 suspension in the ambulance also made patients feel worse.  
6

7  
8 *"Why did the ambulance have such bad and noisy suspension? Was the road so*  
9  
10 *bad or was it the ambulance suspension?" (Pt10)*  
11

### 12 13 14 EMS personnel's driving skills

15  
16 For the most part, the patients felt that the EMS personnel had good driving skills, reflected  
17  
18 in "smooth and fast transportation" or not driving too fast. Furthermore, if the driver took  
19  
20 notice of the weather and road conditions and adjusted the driving style accordingly, the  
21  
22 patient had an impression of good driving skills and safe transportation. However, some of  
23  
24 the patients felt unsafe and insecure if the ambulance's speed was too high, especially if the  
25  
26 weather conditions were bad or the roads were slippery or uneven.  
27  
28

29  
30 *"It was hailing, they were the size of ping pong balls, and other cars had stopped at*  
31  
32 *the roadside but the ambulance was going very fast." (Pt10)*  
33  
34

## 35 36 **DISCUSSION**

37  
38 Overall, the interviewed patients appeared to feel safe in the EMS and to have confidence  
39  
40 in EMS personnel. Clearly, confidence in the care provider is the main factor affecting  
41  
42 patients' sense of safety in the EMS. In addition, medical knowledge and driving skills are  
43  
44 directly related to a positive sense of safety. However, the EMS personnel's professional  
45  
46 competence and good driving skills are meaningless in maintaining the patients'  
47  
48 confidence if the EMS personnel does not treat them in an equal and humane manner.  
49  
50 Therefore, EMS personnel should become more aware of their social interactions and their  
51  
52 importance to patients' perception of safety. In health care overall and in the EMS setting,  
53  
54 it is crucial that health care workers support patient involvement in care decisions and  
55  
56 provide relevant information to the patients. By seeing the patient as a team member and  
57  
58  
59  
60



1  
2  
3 involving them in their care[19,25], the EMS personnel can create a psychologically safe  
4 environment for the patients. Patients then are more likely to talk about their concerns, to  
5 get an experience of interaction, and to feel safe in the EMS encounter. In previous  
6 research, the Finnish patient safety experts stated that trust in the healthcare  
7 professionals and their attitudes towards patient participation in general are important,  
8 when involving patients in improving patient safety[26].  
9

10  
11 In this study, the perception of equality, the possibility to get information, and the  
12 involvement in care decisions affected the patient's sense of safety in the EMS. A previous  
13 study[27] showed that shared information and being treated in a friendly and respectful  
14 manner are important according to patients. If they feel objectified by the EMS personnel,  
15 this may cause a feeling of "suffering from care"[28], leading to a sense of unsafety. Previous  
16 knowledge of patient experiences of safety in hospital settings[18-20] highlights that being  
17 treated equally is important to patients, and based on our findings this is also true in the  
18 context of EMS.  
19

20  
21 In other healthcare settings, researchers establish positive associations between the patient  
22 experiences and patient safety and clinical effectiveness[29]. From the experiences,  
23 valuable information emerged on how to improve patient safety and the patient encounter  
24 in EMS. The EMS personnel's clinical judgment was important when patients described what  
25 makes them feel safe when cared for by EMS personnel. On the other hand, some of the  
26 patients had experienced, especially with driving, a situation that could have compromised  
27 the safety of the patient and the EMS personnel. A previous study reveals that EMS users  
28 value a short waiting time, confidence, professionalism and communication[30]. Our study  
29 points out that these same factors also influence their perceptions of their safety. However,  
30 in our study a short waiting time according to patients ranged from a few to 30 minutes.  
31  
32  
33  
34  
35  
36  
37  
38  
39  
40  
41  
42  
43  
44  
45  
46  
47  
48  
49  
50  
51  
52  
53  
54  
55  
56  
57  
58  
59  
60

1  
2  
3 In some respects, our findings are in line with the results described in former patient safety  
4 culture studies[6-9]. The categories *equal treatment, information and involvement in care*  
5  
6  
7 *decisions* reflect both the “social process” and the “psychological dimension”[7] or  
8  
9  
10 teamwork, communication and patient-centredness described in other studies[6,8-9]. On the  
11  
12 other hand, the categories *EMS personnel’s professional competence, environmental*  
13  
14 *factors* and *EMS personnel’s driving skills* reflect the “organizational dimension”[7] or  
15  
16 leadership and evidence-based health care described in the other studies[6,8-9]. Like a  
17  
18 study conducted in hospital setting suggests[31], error management should promote  
19  
20 developing a strong safety culture that affords the patient a role in promoting safety in their  
21  
22 care. Our study highlights the gap between what safety means to the EMS personnel or the  
23  
24 EMS organization and what kind of perceptions patients had safety in the EMS encounter.  
25  
26 Patient perception of safety in the EMS is not the same as actually receiving safe care.  
27  
28 Therefore, EMS organizations and EMS personnel must continue to develop the other safety  
29  
30 elements in the EMS.  
31  
32  
33

34  
35 Furthermore, based on this study and a former study[32], EMS personnel, EMS  
36  
37 organizations, and vocational training providers need additional knowledge about factors  
38  
39 affecting patients’ sense of safety in the EMS. The EMS personnel require more education  
40  
41 to improve their social skills and to be able to foster psychological safety for the patient. The  
42  
43 curriculum in EMS personnel training should thus be expanded to include development of  
44  
45 social skills. Therefore, in the future it could be beneficial to explore the social factor between  
46  
47 EMS personnel and the patients by using ethnographic framework within observational  
48  
49 study.  
50  
51  
52  
53  
54

### 55 **Study strengths and limitations**

56  
57 It could be a strength or a limitation that the researchers had a deep pre-understanding of  
58  
59 the research topic. Our deep theoretical and clinical experience helps us to understand  
60

1  
2  
3 patients' experiences of the EMS and also to put these into a clinical context despite the  
4  
5 short interviews. However, theoretical and clinical experience could also cause a bias via a  
6  
7 lack of openness to the subject. To reduce this potential bias, we moved back and forth  
8  
9 between the interviews and the expressions and between the categories and the interviews  
10  
11 during the analysis. In addition, one of the researchers had no experience with EMS, but  
12  
13 had working knowledge of patient safety, and this reduced the risk of bias caused by  
14  
15 preconceptions.  
16  
17

18  
19 The patients were recruited from only one health care district area, which could reduce the  
20  
21 transferability of the results. However, patients' characteristics cover common EMS patient  
22  
23 groups according to the ERC official statistics and therefore it is reasonable to think that the  
24  
25 results can be transferred to a similar context. According to the exclusion criteria, we did not  
26  
27 interview high priority patients suffering for multiple traumas or other life-threatening  
28  
29 conditions or inter-hospital transfers. These patients could have given valuable information  
30  
31 their perceptions of safety when EMS personnel must use for example support equipment  
32  
33 and different kinds of transfer methods.  
34  
35

36  
37 The interviews were performed when the patient was admitted to the ED. This may also be  
38  
39 considered a limitation or a strength: a limitation due to the patient's experiences of illness,  
40  
41 a strength due to their memory of the EMS personnel and the EMS encounter being fresh  
42  
43 and unaffected by other people's opinions. Because of the timing of the interviews, one  
44  
45 might assume that the care in the EMS was still in the patients' recent memory. The short  
46  
47 duration of the interviews may be a limitation and may have been caused by the patients'  
48  
49 illness or fatigue. It is possible that the short duration would limit the depth of understanding.  
50  
51 Even though the interviews were done alone with the patient, it is possible that the patients  
52  
53 were hesitant to openly share their views. There could have been barriers to the patients  
54  
55 disclosing their concerns caused by for instance "I do not want to be a troublemaker", "I do  
56  
57  
58  
59  
60

1  
2  
3 not know how to raise my concern", or "I do not want to harm my relationship with members  
4 of the medical team"[33]. To reduce these concerns, the interviewer introduced herself as a  
5 researcher, wore casual attire, and informed the patient that interviews are analysed  
6 anonymously. Moreover, we informed the patients that participating or withdrawing or  
7 anything that they say will not influence their treatment in the hospital or EMS. Despite  
8 certain limitations, this study offers valuable insights into patients' perceptions of safety in  
9 EMS.  
10  
11  
12  
13  
14  
15  
16  
17  
18  
19  
20

## 21 **CONCLUSIONS**

22  
23 The EMS personnel's social interactions seem to be associated with patients' perceptions  
24 of safety. Thus, more attention should be directed to their social skills and their ability to  
25 create a psychologically safe environment for the patient. In addition, this study adds to the  
26 knowledge about the factors contributing to or reducing patients' perception of safety when  
27 attended to by EMS personnel. This information is valuable when EMS organizations design  
28 methods to involve patients in developing their safety performance.  
29  
30  
31  
32  
33  
34  
35  
36  
37  
38

## 39 **ACKNOWLEDGEMENTS**

40  
41 We thank the EMS patients who shared their experiences with us. We also thank the  
42 emergency department nurses for valuable help in recruiting patients. Thanks to the  
43 Spoken company for the copyediting services.  
44  
45  
46  
47

## 48 **CONFLICT OF INTEREST**

49  
50 All authors declare that they have no competing interests.  
51  
52  
53  
54  
55  
56  
57  
58  
59  
60

1  
2  
3  
4  
5  
6  
7  
8  
9  
10  
11  
12  
13  
14  
15  
16  
17  
18  
19  
20  
21  
22  
23  
24  
25  
26  
27  
28  
29  
30  
31  
32  
33  
34  
35  
36  
37  
38  
39  
40  
41  
42  
43  
44  
45  
46  
47  
48  
49  
50  
51  
52  
53  
54  
55  
56  
57  
58  
59  
60

## **AUTHORS' CONTRIBUTIONS**

All authors contributed to this study as follows: study design (AV, VL, MC), data collection (AV), data analysis (AV, VL, ST), and writing the manuscript (AV, VL, MC, ST). All authors read and approved the final manuscript.

## **FUNDING**

Funding was provided by Finnish State Research Funding.

## **AVAILABILITY OF DATA AND MATERIAL**

The data used and analysed during the study are available from the corresponding author on reasonable request.

## **CONCENT FOR PUBLICATION**

Not applicable.

## **REFERENCES**

1. Institute of Medicine (US) Committee on Quality of Health Care in America; Kohn LT, Corrigan JM, Donaldson MS, eds. To Err is Human: Building a Safer Health System. Washington (DC): National Academies Press (US); 2000. doi:10.17226/9728.
2. World Health Organization. Exploring patient participation in reducing health-care related safety risks. World Health Organization, Copenhagen. 2013. Available from: [http://www.euro.who.int/\\_\\_data/assets/pdf\\_file/0010/185779/e96814.pdf](http://www.euro.who.int/__data/assets/pdf_file/0010/185779/e96814.pdf) Accessed: 15 November 2019.
3. World Health Organization. Patient engagement. Technical series on safer primary care. Geneva: WHO, 2016. Available from: <https://apps.who.int/iris/bitstream/handle/10665/252269/9789241511629-eng.pdf>. Accessed: 15 November 2019.

- 1  
2  
3 4. Vincent C, Burnett S, Carthey J. Safety measurement and monitoring in healthcare: A  
4 framework to guide clinical teams and healthcare organizations in maintaining safety. *BMJ*  
5 *Qual Saf* 2014;23:670-677. doi:10.1136/bmjqs-2013-002757.  
6  
7
- 8  
9 5. World Health Organization (WHO) 2009. Conceptual Framework for the International  
10 Classification for Patient Safety, Version 1.1, Final Technical Report.  
11  
12 [https://apps.who.int/iris/bitstream/handle/10665/70882/WHO\\_IER\\_PSP\\_2010.2\\_eng.pdf?s](https://apps.who.int/iris/bitstream/handle/10665/70882/WHO_IER_PSP_2010.2_eng.pdf?sequence=1)  
13 [equence=1](https://apps.who.int/iris/bitstream/handle/10665/70882/WHO_IER_PSP_2010.2_eng.pdf?sequence=1).  
14  
15
- 16  
17 6. Sammer, C.E., Lykens, K., Singh, K.P., Mains, D.A. and Lackan, N.A. 2010. What is  
18 Patient Safety Culture? A Review of the Literature. *J Nurs Scholarsh*, 42: 156-165.  
19  
20 doi:10.1111/j.1547-5069.2009.01330.x  
21  
22
- 23  
24 7. Reiman T, Pietikäinen E, Oedewald P. Multilayered approach to patient safety culture.  
25 *Qual Saf Health Care* 2010;19. doi:10.1136/qshc.2008.029793.  
26  
27
- 28  
29 8. Stavrianopoulos, T. 2012. The development of patient safety culture. *Health Sci J*, 6(2),  
30 201.  
31  
32
- 33  
34 9. Reis, C. T., Paiva, S. G., & Sousa, P. 2018. The patient safety culture: a systematic  
35 review by characteristics of hospital survey on patient safety culture dimensions. *Int J Qual*  
36 *Health Care*, 30(9), 660-677. doi: 10.1093/intqhc/mzy080  
37  
38
- 39  
40 10. Holgate R. The opinion of emergency medical service personnel regarding safety in  
41 pre-hospital emergency care practice. Johannesburg: University of the Witwatersrand,  
42 2015. Available from:  
43 <https://pdfs.semanticscholar.org/fbb6/a55bfbf33da065422982f16a79de87fd8a46.pdf>.  
44  
45 Accessed: 15 November 2019.  
46  
47
- 48  
49 11. Brice JH, Studnek JR, Bigham BL, et al. EMS provider and patient safety during  
50 response and transport: Proceedings of an ambulance safety conference. *Prehosp Emerg*  
51 *Care*. 2012;16:3-19. doi:10.3109/10903127.2011.626106.  
52  
53
- 54  
55 12. Weaver MD, Wang HE, Fairbanks RJ, Patterson D. The association between EMS  
56 workplace safety culture and safety outcomes. *Prehosp Emerg Care*. 2012;16(1):43-52.  
57  
58 doi:10.3109/10903127.2011.614048  
59  
60

1  
2  
3  
4  
5  
6  
7  
8  
9  
10  
11  
12  
13  
14  
15  
16  
17  
18  
19  
20  
21  
22  
23  
24  
25  
26  
27  
28  
29  
30  
31  
32  
33  
34  
35  
36  
37  
38  
39  
40  
41  
42  
43  
44  
45  
46  
47  
48  
49  
50  
51  
52  
53  
54  
55  
56  
57  
58  
59  
60

13. Salminen-Tuomaala M, Leikkola P, Paavilainen E. Patient and staff safety incidents and near misses in out-of-hospital emergency care. *Emergency Med* 2014;4:219. doi:10.4172/2165-7548.1000219.

14. Salminen-Tuomaala M, Leikkola P, Paavilainen E. Emergency health care professionals' experiences of factors that influence care quality and safety. *Clin Nurs Stud*. 2015;3:60-68. doi:10.5430/cns.v3n3p60.

15. Bigham BL, Buick JE, Brooks SC, Morrison M, Shojania KG, Morrison LJ. Patient safety in emergency medical services: A systematic review of the literature. *Prehosp Emerg Care*. 2012;16:20-35 doi:10.3109/10903127.2011.621045.

16. Coster JE, Irving AD, Turner JK, Phung VH, Siriwardena AN. Prioritizing novel and existing ambulance performance measures through expert and lay consensus: A three-stage multimethod consensus study. *Health Expect*. 2018;21:249–260. doi:10.1111/hex.12610.

17. Fairbanks RJ, Crittenden CN, O'Gara KG, et al. Emergency medical services provider perceptions of the nature of adverse events and near-misses in out-of-hospital care: An ethnographic view. *Acad Emerg Med*. 2008;15:633-640. doi:10.1111/j.1553-2712.2008.00147.x.

18. Rainey H, Ehrich K, Mackintosh N, Sandall J. The role of patients and their relatives in 'speaking up' about their own safety - a qualitative study of acute illness. *Health Expect*. 2015;18:392-405. doi: 10.1111/hex.12044.

19. Sahlström M, Partanen P, Azimirad M, Selander T, Turunen H. Patient participation in patient safety—An exploration of promoting factors. *J Nurs Manag*. 2019;27:84-92. doi: 10.1111/jonm.12651.

20. McTier L, Botti M, Duke M. Patient participation in medication safety during an acute care admission. *Health Expect*. 2015;18:1744-1756. doi:10.1111/hex.12167.

21. Health Care Act 1326:2010. Ministry of Social Affairs and Health, Finland. 2013.

22. Ministry of Social Affairs and Health decree of prehospital emergency care 585:2017. Ministry of Social Affairs and Health, Finland. 2017.

- 1  
2  
3 23. Patton MQ. *Qualitative research and evaluation methods: Integrating theory and*  
4 *practice*. Fourth edition ed. California, United States of America: SAGE Publications, Inc.;  
5 2015:52-53.  
6  
7  
8  
9 24. Elo S, Kyngäs H. The qualitative content analysis process. *J Adv Nurs*. 2008;62:107-  
10 115. doi:10.1111/j.1365-2648.2007.04569.x.  
11  
12  
13  
14 25. Edmondson, A. "Psychological Safety, Trust and Learning: A Group-level Lens." In:  
15 Kramer R., Cook K. eds. *Trust and Distrust in Organizations: Dilemmas and Approaches*,  
16 239–272. New York: Russell Sage Foundation. 2004.  
17  
18  
19  
20 26. Sahlström M, Partanen P, Rathert C, Turunen H. Patient participation in patient safety  
21 still missing: Patient safety experts' views. *Int J Nurs Pract*. 2016;22(5):461-469.  
22 doi:10.1111/ijn.12476.  
23  
24  
25  
26  
27 27. Bishop AC, Macdonald M. Patient involvement in patient safety: A qualitative study of  
28 nursing staff and patient perceptions. *J Patient Saf*. 2017;13:82-87.  
29 doi:10.1097/PTS.000000000000123.  
30  
31  
32  
33 28. Ahlenius M, Lindström V, Vicente V. Patients' experience of being badly treated in the  
34 ambulance service: A qualitative study of deviation reports in Sweden. *Int Emerg Nurs*.  
35 2017;30:25-30 doi:10.1016/j.ienj.2016.07.004.  
36  
37  
38  
39 29. Doyle C, Lennox L, Bell D. A systematic review of evidence on the links between  
40 patient experience and clinical safety and effectiveness. *BMJ*  
41 *Open* 2013;3:e001570. doi:10.1136/bmjopen-2012-001570  
42  
43  
44  
45  
46 30. Togher FJ, O'Cathain A, Phung V-, Turner J, Siriwardena AN. Reassurance as a key  
47 outcome valued by emergency ambulance service users: A qualitative interview study.  
48 *Health Expect*. 2015;18:2951-2961. doi:10.1111/hex.12279.  
49  
50  
51  
52 31. Sahlström M, Partanen P, Turunen H. Safety as experienced by patients themselves: a  
53 Finnish survey of the most recent period of care. *Res Nurs Health*. 2014;37(3):194-203.  
54 doi:10.1002/nur.21589  
55  
56  
57  
58  
59  
60



1  
2  
3  
4  
5  
6  
7  
8  
9  
10  
11  
12  
13  
14  
15  
16  
17  
18  
19  
20  
21  
22  
23  
24  
25  
26  
27  
28  
29  
30  
31  
32  
33  
34  
35  
36  
37  
38  
39  
40  
41  
42  
43  
44  
45  
46  
47  
48  
49  
50  
51  
52  
53  
54  
55  
56  
57  
58  
59  
60

32. Sjölin H, Lindström V, Hult H, Ringsted C, Kurland L. What an ambulance nurse needs to know: A content analysis of curricula in the specialist nursing programme in prehospital emergency care. *Int Emerg Nurs*. 2015;23:127-132. doi:10.1016/j.ienj.2014.09.002.

33. Bell SK, Roche SD, Mueller A, et al. Speaking up about care concerns in the ICU: Patient and family experiences, attitudes and perceived barriers. *BMJ Qual Saf*. 2018;27:928-936. doi:10.1136/bmjqs-2017-007525.

For peer review only

1  
2  
3  
4  
5  
6 I, the Submitting Author has the right to grant and does grant on behalf of all authors of the Work (as  
7 defined in the below author licence), an exclusive licence and/or a non-exclusive licence for  
8 contributions from authors who are: i) UK Crown employees; ii) where BMJ has agreed a CC-BY  
9 licence shall apply, and/or iii) in accordance with the terms applicable for US Federal Government  
10 officers or employees acting as part of their official duties; on a worldwide, perpetual, irrevocable,  
11 royalty-free basis to BMJ Publishing Group Ltd ("BMJ") its licensees and where the relevant Journal is  
12 co-owned by BMJ to the co-owners of the Journal, to publish the Work in BMJ Open and any other BMJ  
13 products and to exploit all rights, as set out in our licence.

14  
15 The Submitting Author accepts and understands that any supply made under these terms is made by  
16 BMJ to the Submitting Author unless you are acting as an employee on behalf of your employer or a  
17 postgraduate student of an affiliated institution which is paying any applicable article publishing charge  
18 ("APC") for Open Access articles. Where the Submitting Author wishes to make the Work available on  
19 an Open Access basis (and intends to pay the relevant APC), the terms of reuse of such Open Access  
20 shall be governed by a Creative Commons licence – details of these licences and which Creative  
21 Commons licence will apply to this Work are set out in our licence referred to above.  
22  
23  
24  
25  
26  
27  
28  
29  
30  
31  
32  
33  
34  
35  
36  
37  
38  
39  
40  
41  
42  
43  
44  
45  
46  
47  
48  
49  
50  
51  
52  
53  
54  
55  
56  
57  
58  
59  
60

1  
2  
3  
4  
5  
6  
7  
8  
9  
10  
11  
12  
13  
14  
15  
16  
17  
18  
19  
20  
21  
22  
23  
24  
25  
26  
27  
28  
29  
30  
31  
32  
33  
34  
35  
36  
37  
38  
39  
40  
41  
42  
43  
44  
45  
46  
47  
48  
49  
50  
51  
52  
53  
54  
55  
56  
57  
58  
59  
60

Figure legend: Overview of the categories

For peer review only

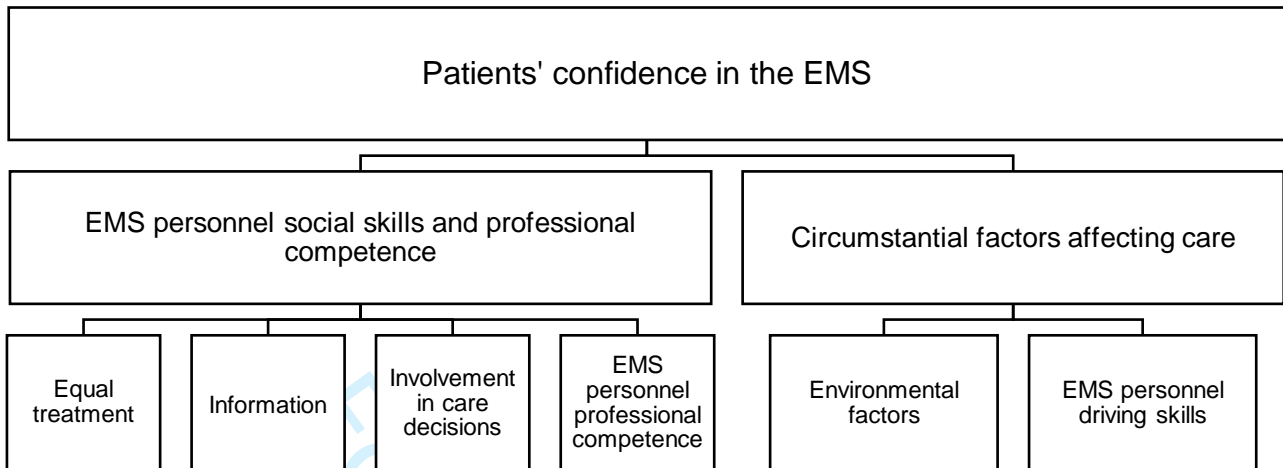

Figure 1. Overview of the categories.

1  
2  
3  
4  
5  
6  
7  
8  
9  
10  
11  
12  
13  
14  
15  
16  
17  
18  
19  
20  
21  
22  
23  
24  
25  
26  
27  
28  
29  
30  
31  
32  
33  
34  
35  
36  
37  
38  
39  
40  
41  
42  
43  
44  
45  
46  
47  
48  
49  
50  
51  
52  
53  
54  
55  
56  
57  
58  
59  
60

## Supplementary file 1: Interview guide

1. Can you tell me about your experience of the EMS encounter?
  - Additional questions:
    - Can you tell me more about the waiting time?
    - Can you tell me more about the assessment?
    - Can you tell me more about the treatment?
    - Can you tell me more about the transportation?
    - Can you tell me more about the handover at the ED?
2. What made you feel safe during the EMS encounter?
  - Follow up question if needed:
    - Can you tell me more about that?
3. Was there anything that made you feel insecure during the EMS encounter?
  - Follow up question if needed:
    - Can you tell me more about that?
4. Is there something else you want to tell me about the care in the EMS?

## Supplementary file 2: Example of the coding tree

| Patients' descriptions                                                                                                                                                                                                                                                                                                                          | Subcategories                                                                                                     |                                                         |                                                                                    |                       |                                       |                              |
|-------------------------------------------------------------------------------------------------------------------------------------------------------------------------------------------------------------------------------------------------------------------------------------------------------------------------------------------------|-------------------------------------------------------------------------------------------------------------------|---------------------------------------------------------|------------------------------------------------------------------------------------|-----------------------|---------------------------------------|------------------------------|
|                                                                                                                                                                                                                                                                                                                                                 | Equal treatment                                                                                                   | Information                                             | Involvement in care decisions                                                      | Environmental factors | EMS personnel professional competence | EMS personnel driving skills |
| <p><i>They weren't sort of formal. So, they were like a human next to a human. So, I feel that this is a very important thing at least for me personally. So, like if they look like officials/formal and just very formally ask these questions it is different than if they are not as formal. It creates a sort of pleasant feeling.</i></p> | <p>Don't feel nice if acting is too official</p> <p>Natural acting (not too official) makes relationship nice</p> |                                                         |                                                                                    |                       |                                       |                              |
| <p><i>Well then, the ambulance staff interviewed me and they took all sorts of test and I don't know what they took but I think we were there for an hour and then they said that we should get to the hospital because it won't go away otherwise. So, then we came here and now I am here.</i></p>                                            |                                                                                                                   | <p>Lack of information about assessment and results</p> |                                                                                    |                       |                                       |                              |
| <p><i>And nothing else other than lie down inside the ambulance and cannula was inserted into my hand and I have type 1 diabetes so they took my blood sugar levels, there was nothing alarming in those readings and they asked if I want to have pain medications and I said I don't need any and every five minutes</i></p>                  |                                                                                                                   |                                                         | <p>Ask patient need for pain medication</p> <p>Ask patient feelings during the</p> |                       |                                       |                              |

1  
2  
3  
4  
5  
6  
7  
8  
9  
10  
11  
12  
13  
14  
15  
16  
17  
18  
19  
20  
21  
22  
23  
24  
25  
26  
27  
28  
29  
30  
31  
32  
33  
34  
35  
36  
37  
38  
39  
40  
41  
42  
43  
44  
45  
46

|                                                                                                                                                                                                                                                                                                                                                                                                                                                                                                                                                                                                                                                       |  |  |           |                                    |                                                                                                                                                                                      |                 |
|-------------------------------------------------------------------------------------------------------------------------------------------------------------------------------------------------------------------------------------------------------------------------------------------------------------------------------------------------------------------------------------------------------------------------------------------------------------------------------------------------------------------------------------------------------------------------------------------------------------------------------------------------------|--|--|-----------|------------------------------------|--------------------------------------------------------------------------------------------------------------------------------------------------------------------------------------|-----------------|
| <p><i>they asked if I was feeling ok. One of the paramedic’s was chatting to me and taking down information and then we arrived at the hospital and we came into this treatment room and I could not imagine any better treatment or transportation or anything.</i></p>                                                                                                                                                                                                                                                                                                                                                                              |  |  | transport |                                    |                                                                                                                                                                                      |                 |
| <p><i>Well I did not hold on to anything, so I was just able to be sort of relaxed. But it did shake and bounce, so the road is worse there, but we got there regardless.</i></p>                                                                                                                                                                                                                                                                                                                                                                                                                                                                     |  |  |           | Shaky and bouncy ride<br>Bad roads |                                                                                                                                                                                      |                 |
| <p><i>Well... They did investigations, like for example this morning. So, then they said that they don’t understand so they will bring me here. Probably it was somewhat tricky what this illness may be, I don’t know. Because it was only two weeks ago when I was here. The transportations were similar. And then when we left home they apparently stopped because I felt that it can’t be this smooth on the road. They tried to insert, and it failed so it was not inserted (shows cannula). They can insert it soon at the hospital, apparently the veins are so fragile. That’s why it failed. Yeah, I don’t know what else to say.</i></p> |  |  |           |                                    | Lack of knowledge (EMS personnel)<br><br>Solution is to transport to the hospital<br><br>Uncertainty to put an IV (paramedics try first and then decide to leave it to the hospital) |                 |
| <p><i>It was good because I was tied securely so I did not sway, and the ambulance</i></p>                                                                                                                                                                                                                                                                                                                                                                                                                                                                                                                                                            |  |  |           |                                    |                                                                                                                                                                                      | Not driving too |

1  
2  
3  
4  
5  
6  
7  
8  
9  
10  
11  
12  
13  
14  
15  
16  
17  
18  
19  
20  
21  
22  
23  
24  
25  
26  
27  
28  
29  
30  
31  
32  
33  
34  
35  
36  
37  
38  
39  
40  
41  
42  
43  
44  
45  
46

|                                                                                                                                                |  |  |  |  |  |                                                                      |
|------------------------------------------------------------------------------------------------------------------------------------------------|--|--|--|--|--|----------------------------------------------------------------------|
| <p><i>driver did not drive recklessly and then I knew it was safe to be aboard on the way to get treatment. And to be in expert hands.</i></p> |  |  |  |  |  | <p>fast<br/><br/>Sens of safety when get transported to hospital</p> |
|------------------------------------------------------------------------------------------------------------------------------------------------|--|--|--|--|--|----------------------------------------------------------------------|

For peer review only



1  
2  
3  
4  
5  
6  
7  
8  
9  
10  
11  
12  
13  
14  
15  
16  
17  
18  
19  
20  
21  
22  
23  
24  
25  
26  
27  
28  
29  
30  
31  
32  
33  
34  
35  
36  
37  
38  
39  
40  
41  
42  
43  
44  
45  
46

For peer review only

## COREQ (CONsolidated criteria for REporting Qualitative research) Checklist

A checklist of items that should be included in reports of qualitative research. You must report the page number in your manuscript where you consider each of the items listed in this checklist. If you have not included this information, either revise your manuscript accordingly before submitting or note N/A.

| Topic                                          | Item No. | Guide Questions/Description                                                                                                                              | Reported on Page No. |
|------------------------------------------------|----------|----------------------------------------------------------------------------------------------------------------------------------------------------------|----------------------|
| <b>Domain 1: Research team and reflexivity</b> |          |                                                                                                                                                          |                      |
| <i>Personal characteristics</i>                |          |                                                                                                                                                          |                      |
| Interviewer/facilitator                        | 1        | Which author/s conducted the interview or focus group?                                                                                                   |                      |
| Credentials                                    | 2        | What were the researcher's credentials? E.g. PhD, MD                                                                                                     |                      |
| Occupation                                     | 3        | What was their occupation at the time of the study?                                                                                                      |                      |
| Gender                                         | 4        | Was the researcher male or female?                                                                                                                       |                      |
| Experience and training                        | 5        | What experience or training did the researcher have?                                                                                                     |                      |
| <i>Relationship with participants</i>          |          |                                                                                                                                                          |                      |
| Relationship established                       | 6        | Was a relationship established prior to study commencement?                                                                                              |                      |
| Participant knowledge of the interviewer       | 7        | What did the participants know about the researcher? e.g. personal goals, reasons for doing the research                                                 |                      |
| Interviewer characteristics                    | 8        | What characteristics were reported about the interviewer/facilitator? e.g. Bias, assumptions, reasons and interests in the research topic                |                      |
| <b>Domain 2: Study design</b>                  |          |                                                                                                                                                          |                      |
| <i>Theoretical framework</i>                   |          |                                                                                                                                                          |                      |
| Methodological orientation and Theory          | 9        | What methodological orientation was stated to underpin the study? e.g. grounded theory, discourse analysis, ethnography, phenomenology, content analysis |                      |
| <i>Participant selection</i>                   |          |                                                                                                                                                          |                      |
| Sampling                                       | 10       | How were participants selected? e.g. purposive, convenience, consecutive, snowball                                                                       |                      |
| Method of approach                             | 11       | How were participants approached? e.g. face-to-face, telephone, mail, email                                                                              |                      |
| Sample size                                    | 12       | How many participants were in the study?                                                                                                                 |                      |
| Non-participation                              | 13       | How many people refused to participate or dropped out? Reasons?                                                                                          |                      |
| <i>Setting</i>                                 |          |                                                                                                                                                          |                      |
| Setting of data collection                     | 14       | Where was the data collected? e.g. home, clinic, workplace                                                                                               |                      |
| Presence of non-participants                   | 15       | Was anyone else present besides the participants and researchers?                                                                                        |                      |
| Description of sample                          | 16       | What are the important characteristics of the sample? e.g. demographic data, date                                                                        |                      |
| <i>Data collection</i>                         |          |                                                                                                                                                          |                      |
| Interview guide                                | 17       | Were questions, prompts, guides provided by the authors? Was it pilot tested?                                                                            |                      |
| Repeat interviews                              | 18       | Were repeat interviews carried out? If yes, how many?                                                                                                    |                      |
| Audio/visual recording                         | 19       | Did the research use audio or visual recording to collect the data?                                                                                      |                      |
| Field notes                                    | 20       | Were field notes made during and/or after the interview or focus group?                                                                                  |                      |
| Duration                                       | 21       | What was the duration of the interviews or focus group?                                                                                                  |                      |
| Data saturation                                | 22       | Was data saturation discussed?                                                                                                                           |                      |
| Transcripts returned                           | 23       | Were transcripts returned to participants for comment and/or                                                                                             |                      |

| Topic                                  | Item No. | Guide Questions/Description                                                                                                        | Reported on Page No. |
|----------------------------------------|----------|------------------------------------------------------------------------------------------------------------------------------------|----------------------|
|                                        |          | correction?                                                                                                                        |                      |
| <b>Domain 3: analysis and findings</b> |          |                                                                                                                                    |                      |
| <i>Data analysis</i>                   |          |                                                                                                                                    |                      |
| Number of data coders                  | 24       | How many data coders coded the data?                                                                                               |                      |
| Description of the coding tree         | 25       | Did authors provide a description of the coding tree?                                                                              |                      |
| Derivation of themes                   | 26       | Were themes identified in advance or derived from the data?                                                                        |                      |
| Software                               | 27       | What software, if applicable, was used to manage the data?                                                                         |                      |
| Participant checking                   | 28       | Did participants provide feedback on the findings?                                                                                 |                      |
| <i>Reporting</i>                       |          |                                                                                                                                    |                      |
| Quotations presented                   | 29       | Were participant quotations presented to illustrate the themes/findings?<br>Was each quotation identified? e.g. participant number |                      |
| Data and findings consistent           | 30       | Was there consistency between the data presented and the findings?                                                                 |                      |
| Clarity of major themes                | 31       | Were major themes clearly presented in the findings?                                                                               |                      |
| Clarity of minor themes                | 32       | Is there a description of diverse cases or discussion of minor themes?                                                             |                      |

Developed from: Tong A, Sainsbury P, Craig J. Consolidated criteria for reporting qualitative research (COREQ): a 32-item checklist for interviews and focus groups. *International Journal for Quality in Health Care*. 2007. Volume 19, Number 6: pp. 349 – 357

**Once you have completed this checklist, please save a copy and upload it as part of your submission. DO NOT include this checklist as part of the main manuscript document. It must be uploaded as a separate file.**
