# Supplementary material for: Patients’ perceptions of safety in emergency medical services: an interview study
Source: PubMed Central journal article supplement — BMJ Open. 2020 Oct 21;10(10):e037488. doi: 10.1136/bmjopen-2020-037488 (PMC7580042; doi:10.1136/bmjopen-2020-037488), 2020-10-21
Supplement: bmjopen-2020-037488supp001.pdf [file bmjopen-2020-037488supp001.pdf]

### Supplementary file 1: Interview guide

1. Can you tell me about your experience of the EMS encounter?
  - Additional questions:
    - Can you tell me more about the waiting time?
    - Can you tell me more about the assessment?
    - Can you tell me more about the treatment?
    - Can you tell me more about the transportation?
    - Can you tell me more about the handover at the ED?
2. What made you feel safe during the EMS encounter?
  - Follow up question if needed:
    - Can you tell me more about that?
3. Was there anything that made you feel insecure during the EMS encounter?
  - Follow up question if needed:
    - Can you tell me more about that?
4. Is there something else you want to tell me about the care in the EMS?
